# Supplementary material for: Highly enantioselective transfer hydrogenation of racemic α-substituted β-keto sulfonamidesviadynamic kinetic resolution
Source: Royal Society of Chemistry journal article supplement (doi:10.1039/c8cc01643g), 2018-01-01
Supplement: c8cc01643g1.pdf [file c8cc01643g1.pdf]

*Supporting Information*

**Highly Enantioselective Transfer Hydrogenation of Racemic  $\alpha$ -  
Substituted  $\beta$ -keto Sulfonamides *via* Dynamic Kinetic Resolution**

*Zhichao Xiong, Chengfeng Peia, Peng Xue, Hui Lv\* and Xumu Zhang\**

Table of contents

|                                                                                                           |     |
|-----------------------------------------------------------------------------------------------------------|-----|
| 1 General Information.....                                                                                | S2  |
| 2 General procedure for the synthesis of $\alpha$ -Substituted $\beta$ -keto Sulfonamides.....            | S2  |
| 3 General procedure for asymmetric hydrogenation of $\alpha$ -Substituted $\beta$ -keto Sulfonamides..... | S8  |
| 4 NMR spectra.....                                                                                        | S14 |
| 5 HPLC spectra of <b>2</b> .....                                                                          | S50 |

## 1. General Information

Unless otherwise noted, all reagents and solvents were purchased from commercial suppliers and used without further purification. NMR spectra were recorded on Bruker ADVANCE III (400 MHz) spectrometers for  $^1\text{H}$  NMR and  $^{13}\text{C}$  NMR.  $\text{CDCl}_3$  was the solvent used for the NMR analysis, with tetramethylsilane as the internal standard. Chemical shifts were reported upfield to TMS (0.00 ppm) for  $^1\text{H}$  NMR and relative to  $\text{CDCl}_3$  (77.3 ppm) for  $^{13}\text{C}$  NMR. Optical rotation was determined using a Perkin Elmer 343 polarimeter. HPLC analysis was conducted on an Agilent 1260 Series instrument. Column Chromatography was performed with silica gel Merck 60 (300-400 mesh). All new products were further characterized by HRMS. A positive ion mass spectrum of sample was acquired on a Thermo LTQ-FT mass spectrometer with an electrospray ionization source.

## 2. General procedure for the synthesis of $\alpha$ -Substituted $\beta$ -keto Sulfonamides

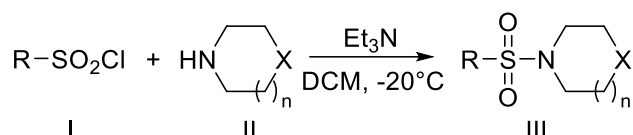

*Preparation of III according to the literature<sup>[1]</sup>:*

To a solution of amine (I, 10 mmol) dissolved in 20 mL of  $\text{CH}_2\text{Cl}_2$  was added triethyl amine (1.01g, 10 mmol) at  $-20^\circ\text{C}$ . Then sulfonyl chloride (II, 15 mmol) was added slowly at  $-20^\circ\text{C}$ . After stirring for 6 h from  $-20^\circ\text{C}$  to room temperature, aqueous  $\text{NH}_4\text{Cl}$  solution (3 mL) was added to reaction mixture. The solution was extracted with  $\text{CH}_2\text{Cl}_2$  ( $3 \times 10$  mL) and the combined organic phase was washed with  $\text{H}_2\text{O}$  ( $3 \times 10$  mL) and brine and dried over  $\text{Na}_2\text{SO}_4$ , filtered and concentrated under vacuum. The residue was purified by chromatography on silica gel using hexanes-ethyl acetate (10:1) as eluant to give the sulfonamide (III).

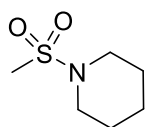

### 1-(methylsulfonyl) piperidine:

White solid, 2.6g, 75% yield;  $^1\text{H}$  NMR (400 MHz,  $\text{CDCl}_3$ )  $\delta$  3.28 – 3.11 (m, 4H), 2.77 (s, 3H), 1.74 – 1.66 (m, 4H), 1.63 – 1.52 (m, 2H).  $^{13}\text{C}$  NMR (101 MHz,  $\text{CDCl}_3$ )  $\delta$  46.77, 34.31, 25.35, 23.68; ESI-HRMS Calculated for  $\text{C}_6\text{H}_{14}\text{NO}_2\text{S}^+$  ( $[\text{M}+\text{H}]^+$ ): 164.0740, found: 164.0737.

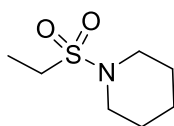

### 1-(ethylsulfonyl) piperidine:

Colorless oil, 7.6g, 80% yield;  $^1\text{H}$  NMR (400 MHz,  $\text{CDCl}_3$ )  $\delta$  3.18 (m, 4H), 2.94 – 2.82 (q, 2H), 1.65 – 1.45 (m, 6H), 1.36 – 1.24 (t, 3H).  $^{13}\text{C}$  NMR (101 MHz,  $\text{CDCl}_3$ )  $\delta$  46.67, 43.65, 25.73, 23.82, 7.84; ESI-HRMS Calculated for  $\text{C}_7\text{H}_{16}\text{NO}_2\text{S}^+$  ( $[\text{M}+\text{H}]^+$ ): 178.0896, found: 178.0898.

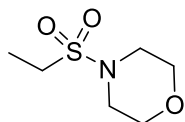

#### 4-(ethylsulfonyl) morpholine

White solid, 1.4g, 70% yield;  $^1\text{H}$  NMR (400 MHz,  $\text{CDCl}_3$ )  $\delta$  3.86 – 3.68 (m, 4H), 3.29 (m, 4H), 2.97 (q,  $J = 7.4$  Hz, 2H), 1.40 (t,  $J = 7.4$  Hz, 3H).  $^{13}\text{C}$  NMR (101 MHz,  $\text{CDCl}_3$ )  $\delta$  66.67, 45.88, 43.46, 7.73; ESI-HRMS Calculated for  $\text{C}_6\text{H}_{14}\text{NO}_3\text{S}^+$  ( $[\text{M}+\text{H}]^+$ ): 180.0689, found: 180.0692.

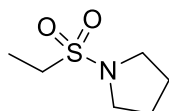

#### 1-(ethylsulfonyl) pyrrolidine:

Colorless oil, 1.8g, 78% yield;  $^1\text{H}$  NMR (400 MHz,  $\text{CDCl}_3$ )  $\delta$  3.37 (m, 4H), 3.02 (q,  $J = 7.4$  Hz, 2H), 2.00 – 1.89 (m, 4H), 1.38 (t,  $J = 7.4$  Hz, 3H).  $^{13}\text{C}$  NMR (101 MHz,  $\text{CDCl}_3$ )  $\delta$  47.77, 44.04, 25.92, 8.00; ESI-HRMS Calculated for  $\text{C}_6\text{H}_{14}\text{NO}_2\text{S}^+$  ( $[\text{M}+\text{H}]^+$ ): 164.0740, found: 164.0735.

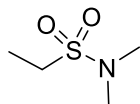

#### N, N-dimethylethanesulfonamide

Colorless oil, 1.5g, 76% yield;  $^1\text{H}$  NMR (400 MHz,  $\text{CDCl}_3$ )  $\delta$  2.95 (q,  $J = 7.4$  Hz, 2H), 2.87 (s, 6H), 1.34 (t,  $J = 7.4$  Hz, 3H);  $^{13}\text{C}$  NMR (101 MHz,  $\text{CDCl}_3$ )  $\delta$  42.84, 37.57, 7.82.

*Preparation of V (1a-1o):*

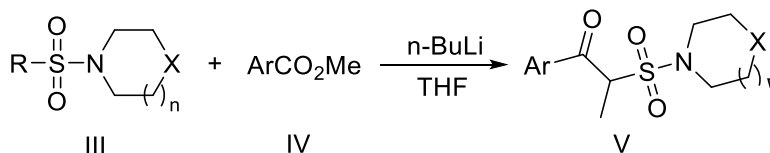

A solution of sulfamide (10 mmol) in 20 ml of dry tetrahydrofuran at  $-78^\circ\text{C}$  was treated dropwise with 11 mmol  $n\text{-BuLi}$  (2.5 M) in hexanes. The reaction mixture was stirred in an ice bath for 1 h and then cooled again to  $-78^\circ\text{C}$ . Then 12 mmol benzoate was added dropwise and stirred at room temperature for 16h. The mixture was concentrated and the residue was treated with 1N HCl (until pH~3), diluted with 10 ml water, and extracted with ethyl acetate. The organic layer was washed with brine, dried over  $\text{Na}_2\text{SO}_4$ , and concentrated under vacuum. The residue was purified by

chromatography on silica gel using hexanes-ethyl acetate (8:1) as eluant to give the target compound.<sup>2</sup>

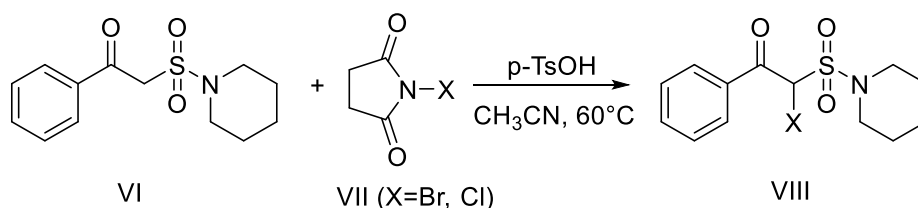

Intermediate VI (1 eq.), VII (1.1 eq.) and p-TsOH (0.1 eq.) were dissolved in anhydrate  $\text{CH}_3\text{CN}$  and stirred at  $60^\circ\text{C}$  for 6 h. After the reaction was completed (monitored by TLC), 20 mL  $\text{H}_2\text{O}$  was added. The solution was extracted with ethyl acetate ( $3 \times 10$  mL) and the combined organic phase was washed with  $\text{H}_2\text{O}$  ( $3 \times 10$  mL) and brine and dried over  $\text{Na}_2\text{SO}_4$ , filtered and concentrated under vacuum. The residue was purified by chromatography on silica gel using hexanes-ethyl acetate (5:1) as eluant to give the product.

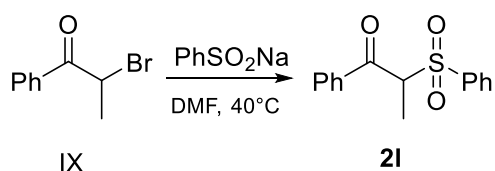

2-bromo-1-phenylpropan-1-one (1 eq.) and  $\text{PhSO}_2\text{Na}$  (1.2 eq.) were dissolved in DMF and heated at  $40^\circ\text{C}$ . When TLC showed the reaction was completed,  $\text{H}_2\text{O}$  and ethyl acetate were added and the reaction mixture was washed with  $\text{H}_2\text{O}$  for three times and brine for one time. The organic layer was dried over  $\text{Na}_2\text{SO}_4$ , filtered and concentrated under vacuum. The residue was purified by chromatography on silica gel using hexanes-ethyl acetate (10:1) as eluant to give the product.<sup>3</sup>

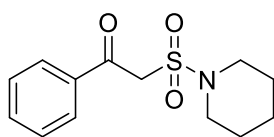

#### 1-phenyl-2-(piperidin-1-ylsulfonyl) ethan-1-one:

White solid, 3.2g, 78% yield;  $^1\text{H}$  NMR (400 MHz,  $\text{CDCl}_3$ )  $\delta$  8.08 – 8.00 (m, 2H), 7.68 – 7.60 (m, 1H), 7.51 (dd,  $J = 10.6, 4.8$  Hz, 2H), 4.55 (s, 2H), 3.39 – 3.22 (m, 4H), 1.60 (m, 6H).  $^{13}\text{C}$  NMR (101 MHz,  $\text{CDCl}_3$ )  $\delta$  189.50, 135.87, 134.35, 129.49, 128.89, 57.36, 47.10, 25.66, 23.67; ESI-HRMS Calculated for  $\text{C}_{13}\text{H}_{18}\text{NO}_3\text{S}^+$  ( $[\text{M}+\text{H}]^+$ ): 268.1002, found: 268.1006.

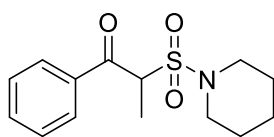

**1-phenyl-2-(piperidin-1-ylsulfonyl) propan-1-one (1a)**

White solid, 2.5g, 78% yield;  $^1\text{H}$  NMR (400 MHz,  $\text{CDCl}_3$ )  $\delta$  8.11 – 7.99 (m, 2H), 7.68 – 7.57 (m, 1H), 7.55 – 7.46 (m, 2H), 5.13 (q,  $J = 6.9$  Hz, 1H), 3.26 (m,  $J = 12.4$  Hz, 4H), 1.65 (d,  $J = 6.9$  Hz, 3H), 1.55 (m, 6H).  $^{13}\text{C}$  NMR (101 MHz,  $\text{CDCl}_3$ )  $\delta$  193.47, 136.21, 134.03, 129.17, 128.82, 62.82, 47.94, 26.12, 23.77, 13.42; ESI-HRMS Calculated for  $\text{C}_{14}\text{H}_{20}\text{NO}_3\text{S}^+$  ( $[\text{M}+\text{H}]^+$ ): 282.1158, found: 282.1153.

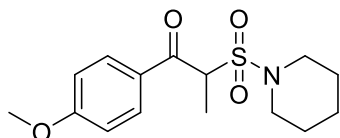**1-(4-methoxyphenyl)-2-(piperidin-1-ylsulfonyl) propan-1-one (1b)**

White solid, 0.48g, 72% yield;  $^1\text{H}$  NMR (400 MHz,  $\text{CDCl}_3$ )  $\delta$  8.30 – 7.88 (m, 2H), 7.17 – 6.77 (m, 2H), 5.07 (q,  $J = 6.9$  Hz, 1H), 3.89 (s, 3H), 3.28 (m, 4H), 1.63 (d,  $J = 6.9$  Hz, 3H), 1.55 (m, 6H).  $^{13}\text{C}$  NMR (101 MHz,  $\text{CDCl}_3$ )  $\delta$  191.60, 164.30, 131.71, 129.20, 114.01, 62.74, 55.63, 47.97, 26.15, 23.81, 13.45. ESI-HRMS Calculated for  $\text{C}_{15}\text{H}_{22}\text{NO}_4\text{S}^+$  ( $[\text{M}+\text{H}]^+$ ): 312.1264, found: 312.1267.

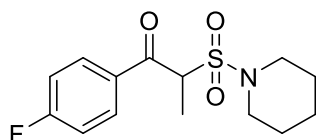**1-(4-fluorophenyl)-2-(piperidin-1-ylsulfonyl) propan-1-one (1c)**

White solid, 0.41g, 71% yield;  $^1\text{H}$  NMR (400 MHz,  $\text{CDCl}_3$ )  $\delta$  8.18 – 8.03 (m, 2H), 7.18 (t,  $J = 8.6$  Hz, 2H), 5.08 (q,  $J = 6.9$  Hz, 1H), 3.28 (m, 4H), 1.64 (d,  $J = 6.9$  Hz, 3H), 1.57 (m, 6H).  $^{13}\text{C}$  NMR (101 MHz,  $\text{CDCl}_3$ )  $\delta$  191.89, 167.55, 165.00, 132.65, 132.62, 132.11, 132.02, 116.10, 115.89, 63.05, 48.03, 26.14, 23.76, 13.32; ESI-HRMS Calculated for  $\text{C}_{14}\text{H}_{19}\text{FNO}_3\text{S}^+$  ( $[\text{M}+\text{H}]^+$ ): 300.1064, found: 300.1059.

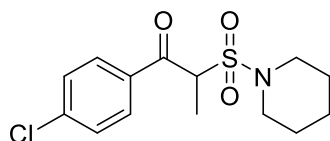**1-(4-chlorophenyl)-2-(piperidin-1-ylsulfonyl) propan-1-one (1d)**

White solid, 0.45g, 75% yield;  $^1\text{H}$  NMR (400 MHz,  $\text{CDCl}_3$ )  $\delta$  7.99 (d,  $J = 8.6$  Hz, 2H), 7.48 (d,  $J = 8.6$  Hz, 2H), 5.06 (q,  $J = 6.9$  Hz, 1H), 3.29 (m, 4H), 1.64 (d,  $J = 6.9$  Hz, 3H), 1.57 (m, 6H).  $^{13}\text{C}$  NMR (101 MHz,  $\text{CDCl}_3$ )  $\delta$  192.35, 140.70, 140.43, 134.51, 130.66, 129.14, 63.13, 48.06, 26.14, 23.76, 13.28; ESI-HRMS Calculated for  $\text{C}_{14}\text{H}_{19}\text{ClNO}_3\text{S}^+$  ( $[\text{M}+\text{H}]^+$ ): 316.0769, found: 316.0766.

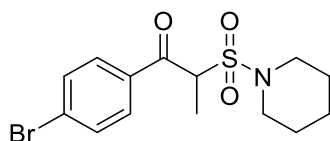

**1-(4-bromophenyl)-2-(piperidin-1-ylsulfonyl) propan-1-one (1e)**

White solid, 0.4g, 72% yield;  $^1\text{H}$  NMR (400 MHz,  $\text{CDCl}_3$ )  $\delta$  7.99 (d,  $J = 8.6$  Hz, 2H), 7.48 (d,  $J = 8.6$  Hz, 2H), 5.06 (q,  $J = 6.9$  Hz, 1H), 3.29 (m, 4H), 1.64 (d,  $J = 6.9$  Hz, 3H), 1.57 (m, 6H).  $^{13}\text{C}$  NMR (101 MHz,  $\text{CDCl}_3$ )  $\delta$  192.57, 134.92, 132.14, 130.71, 129.54, 63.12, 48.06, 26.14, 23.76, 13.27; ESI-HRMS Calculated for  $\text{C}_{14}\text{H}_{19}\text{BrNO}_3\text{S}^+$  ( $[\text{M}+\text{H}]^+$ ): 360.0264, found: 360.0259.

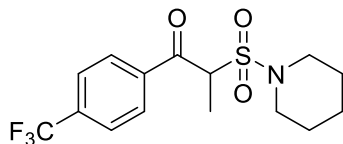**2-(piperidin-1-ylsulfonyl)-1-(4-(trifluoromethyl) phenyl) propan-1-one (1f)**

White solid, 0.43g, 76% yield;  $^1\text{H}$  NMR (400 MHz,  $\text{CDCl}_3$ )  $\delta$  8.09 (dd,  $J = 8.9, 5.3$  Hz, 2H), 7.18 (t,  $J = 8.6$  Hz, 2H), 5.07 (q,  $J = 6.9$  Hz, 1H), 3.27 (m, 4H), 1.64 (d,  $J = 6.9$  Hz, 3H), 1.57 (m, 6H).  $^{13}\text{C}$  NMR (101 MHz,  $\text{CDCl}_3$ )  $\delta$  191.89, 167.56, 165.00, 132.65, 132.62, 132.11, 132.02, 116.11, 115.89, 77.39, 77.07, 76.75, 63.07, 48.03, 26.14, 23.76, 13.32; ESI-HRMS Calculated for  $\text{C}_{15}\text{H}_{19}\text{F}_3\text{NO}_3\text{S}^+$  ( $[\text{M}+\text{H}]^+$ ): 350.1032, found: 350.1026.

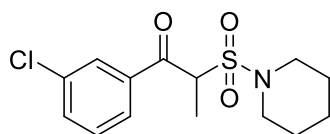**1-(3-chlorophenyl)-2-(piperidin-1-ylsulfonyl) propan-1-one (1g)**

White solid, 0.4g, 72% yield;  $^1\text{H}$  NMR (400 MHz,  $\text{CDCl}_3$ )  $\delta$  7.62 – 7.56 (m, 1H), 7.47 – 7.40 (m, 2H), 7.37 (ddd,  $J = 7.6, 6.0, 2.7$  Hz, 1H), 5.02 (q,  $J = 6.9$  Hz, 1H), 3.33 (m, 4H), 1.68 (d,  $J = 6.9$  Hz, 3H), 1.58 (m, 6H).  $^{13}\text{C}$  NMR (101 MHz,  $\text{CDCl}_3$ )  $\delta$  196.63, 138.82, 132.50, 130.76, 130.39, 130.31, 127.21, 66.49, 47.84, 26.12, 23.77; ESI-HRMS Calculated for  $\text{C}_{14}\text{H}_{19}\text{ClNO}_3\text{S}^+$  ( $[\text{M}+\text{H}]^+$ ): 316.0769, found: 316.0764.

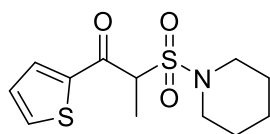**2-(piperidin-1-ylsulfonyl)-1-(thiophen-2-yl) propan-1-one (1h)**

White solid, 0.38g, 70% yield;  $^1\text{H}$  NMR (400 MHz,  $\text{CDCl}_3$ )  $\delta$  7.89 (dd,  $J = 3.9, 1.0$  Hz, 1H), 7.76 (dd,  $J = 4.9, 1.1$  Hz, 1H), 7.19 (dd,  $J = 4.9, 3.9$  Hz, 1H), 4.88 (q,  $J = 7.0$  Hz, 1H), 3.30 (m, 4H), 1.66 (d,  $J = 7.0$  Hz, 3H), 1.56 (m, 6H).  $^{13}\text{C}$  NMR (101 MHz,  $\text{CDCl}_3$ )  $\delta$  185.70, 143.55, 135.93, 134.49, 128.71, 64.86, 47.96, 26.12, 23.76, 13.31; ESI-HRMS Calculated for  $\text{C}_{12}\text{H}_{18}\text{NO}_3\text{S}_2^+$  ( $[\text{M}+\text{H}]^+$ ): 288.0723, found: 288.0717.

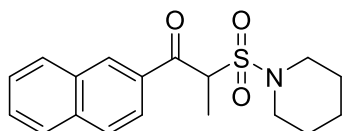

**1-(naphthalen-2-yl)-2-(piperidin-1-ylsulfonyl) propan-1-one (1i)**

White solid, 0.51g, 76% yield;  $^1\text{H}$  NMR (400 MHz,  $\text{CDCl}_3$ )  $\delta$  8.59 (s, 1H), 8.11 – 7.97 (m, 2H), 7.91 (dd,  $J$  = 14.7, 8.4 Hz, 2H), 7.69 – 7.54 (m, 2H), 5.30 (q,  $J$  = 6.9 Hz, 1H), 3.29 (m, 4H), 1.71 (d,  $J$  = 6.9 Hz, 3H), 1.55 (m, 6H).  $^{13}\text{C}$  NMR (101 MHz,  $\text{CDCl}_3$ )  $\delta$  193.40, 193.38, 137.64, 135.94, 134.63, 133.51, 132.41, 131.66, 131.61, 130.01, 129.73, 129.19, 128.88, 128.76, 127.80, 127.07, 127.03, 124.20, 121.53, 63.09, 48.04, 26.16, 23.79, 13.57; ESI-HRMS Calculated for  $\text{C}_{18}\text{H}_{22}\text{NO}_3\text{S}^+$  ( $[\text{M}+\text{H}]^+$ ): 332.1315, found: 332.1308.

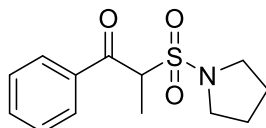**1-phenyl-2-(pyrrolidin-1-ylsulfonyl) propan-1-one (1j)**

White solid, 0.48g, 74% yield;  $^1\text{H}$  NMR (400 MHz,  $\text{CDCl}_3$ )  $\delta$  8.08 – 8.01 (m, 2H), 7.67 – 7.60 (m, 1H), 7.55 – 7.48 (m, 2H), 5.17 (q,  $J$  = 6.9 Hz, 1H), 3.42 – 3.33 (m, 4H), 1.87 – 1.78 (m, 4H), 1.70 (d,  $J$  = 6.9 Hz, 3H).  $^{13}\text{C}$  NMR (101 MHz,  $\text{CDCl}_3$ )  $\delta$  193.61, 136.29, 134.02, 129.07, 128.85, 63.02, 48.90, 47.77, 44.08, 25.93, 25.73, 13.52, 8.01; ESI-HRMS Calculated for  $\text{C}_{13}\text{H}_{18}\text{NO}_3\text{S}^+$  ( $[\text{M}+\text{H}]^+$ ): 268.1002, found: 268.1006.

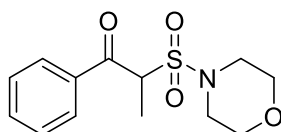**2-(morpholinosulfonyl)-1-phenylpropan-1-one (1k)**

White solid, 0.48g, 744%yield;  $^1\text{H}$  NMR (400 MHz,  $\text{CDCl}_3$ )  $\delta$  8.08 – 8.00 (m, 2H), 7.68 – 7.60 (m, 1H), 7.57 – 7.48 (m, 2H), 5.16 (q,  $J$  = 6.9 Hz, 1H), 3.73 – 3.61 (m, 4H), 3.44 – 3.27 (m, 4H), 1.67 (d,  $J$  = 6.9 Hz, 3H).  $^{13}\text{C}$  NMR (101 MHz,  $\text{CDCl}_3$ )  $\delta$  193.28, 135.97, 134.29, 129.14, 128.95, 66.97, 62.90, 47.14, 13.52; ESI-HRMS Calculated for  $\text{C}_{13}\text{H}_{18}\text{NO}_4\text{S}^+$  ( $[\text{M}+\text{H}]^+$ ): 284.0951, found: 284.0956.

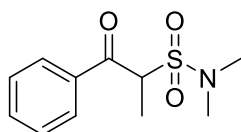**N, N-dimethyl-1-oxo-1-phenylpropane-2-sulfonamide (1l)**

White solid, 0.45g, 87% yield;  $^1\text{H}$  NMR (400 MHz,  $\text{CDCl}_3$ )  $\delta$  8.08 – 8.01 (m, 2H), 7.63 (t,  $J$  = 7.4 Hz, 1H), 7.52 (t,  $J$  = 7.7 Hz, 2H), 5.17 (q,  $J$  = 7.0 Hz, 1H), 2.89 (s, 6H).  $^{13}\text{C}$  NMR (101 MHz,  $\text{CDCl}_3$ )  $\delta$  193.54, 136.13, 134.12, 129.13, 128.87, 62.92, 38.52, 13.62; ESI-HRMS Calculated for  $\text{C}_{11}\text{H}_{16}\text{NO}_3\text{S}^+$  ( $[\text{M}+\text{H}]^+$ ): 242.0845, found: 242.0847.

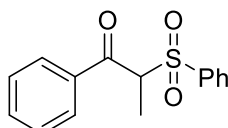

**1-phenyl-2-(phenylsulfonyl) propan-1-one (1m)**

White solid, 0.39g, 93% yield;  $^1\text{H}$  NMR (400 MHz,  $\text{CDCl}_3$ )  $\delta$  8.01 – 7.93 (m, 2H), 7.84 – 7.76 (m, 2H), 7.63 (dt,  $J$  = 16.1, 7.4 Hz, 2H), 7.50 (dt,  $J$  = 17.3, 7.8 Hz, 4H), 5.18 (q,  $J$  = 6.9 Hz, 1H), 1.58 (d,  $J$  = 6.9 Hz, 3H);  $^{13}\text{C}$  NMR (101 MHz,  $\text{CDCl}_3$ )  $\delta$  192.50, 136.16, 135.97, 134.29, 134.16, 129.85, 129.19, 128.93, 128.81, 64.92, 13.23.  $^{13}\text{C}$  NMR (101 MHz,  $\text{CDCl}_3$ )  $\delta$  192.50, 136.16, 135.97, 134.29, 134.16, 129.85, 129.19, 128.93, 128.81, 64.92, 13.23.

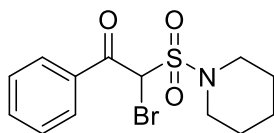**2-bromo-1-phenyl-2-(piperidin-1-ylsulfonyl) ethan-1-one (1n)**

White solid, 0.54g, 85% yield;  $^1\text{H}$  NMR (400 MHz,  $\text{CDCl}_3$ )  $\delta$  7.99 (d,  $J$  = 8.6 Hz, 2H), 7.48 (d,  $J$  = 8.6 Hz, 2H), 5.06 (q,  $J$  = 6.9 Hz, 1H), 3.29 (m, 4H), 1.64 (d,  $J$  = 6.9 Hz, 3H), 1.57 (m, 6H).  $^{13}\text{C}$  NMR (101 MHz,  $\text{CDCl}_3$ )  $\delta$  187.66, 134.66, 134.23, 129.52, 129.02, 58.22, 48.99, 26.12, 23.66; ESI-HRMS Calculated for  $\text{C}_{13}\text{H}_{17}\text{BrNO}_3\text{S}^+$  ( $[\text{M}+\text{H}]^+$ ): 346.0107, found: 346.0103

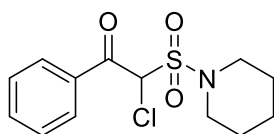**2-chloro-1-phenyl-2-(piperidin-1-ylsulfonyl) ethan-1-one (1o)**

White solid, 0.3g, 85% yield;  $^1\text{H}$  NMR (400 MHz,  $\text{CDCl}_3$ )  $\delta$  8.04 (d,  $J$  = 7.6 Hz, 2H), 7.66 (t,  $J$  = 7.4 Hz, 1H), 7.53 (t,  $J$  = 7.7 Hz, 2H), 6.23 (s, 1H), 3.46 (m, 4H), 1.62 (m, 6H).  $^{13}\text{C}$  NMR (101 MHz,  $\text{CDCl}_3$ )  $\delta$  187.38, 134.72, 134.51, 129.62, 128.96, 70.34, 48.77, 26.07, 23.64; ESI-HRMS Calculated for  $\text{C}_{13}\text{H}_{17}\text{ClNO}_3\text{S}^+$  ( $[\text{M}+\text{H}]^+$ ): 302.0612, found: 302.0609.

**General procedure of the asymmetric hydrogen transfer reduction**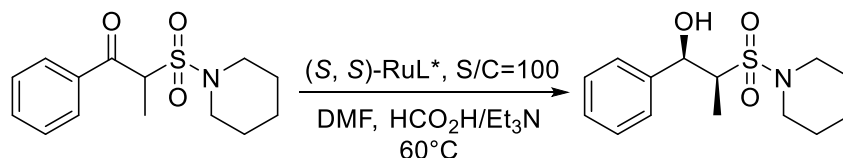

A suspension of  $\beta$ -keto sulfamide (0.16 mmol), (*S, S*)-RuL\* (0.0016 mmol), 5:2  $\text{HCO}_2\text{H}/\text{Et}_3\text{N}$  (0.2 mL) in anhydrous DMF (1 mL) were stirred under  $\text{N}_2$  at 60 °C for 12 h until completion according to TLC detection. 5.0 mL water was added to the reaction, the mixture was then extracted with ethyl acetate (3 $\times$ 5mL) threetimes, dried over  $\text{Na}_2\text{SO}_4$  and concentrated. The desired product was purified by silica gel chromatography (hexanes: ethyl acetate = 1:3). The enantioselectivity of the products was determined by HPLC analysis. The racemic samples of diastereomeric mixtures of 2a-2p for HPLC analysis were prepared following literature procedures.



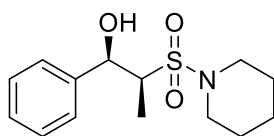

**(1R, 2S)-1-phenyl-2-(piperidin-1-ylsulfonyl) propan-1-ol (2a)**

White solid, 21.8mg, 96% yield, 99% ee, dr= 20:1;  $[\alpha]_D^{20} = 11.6$  ( $c = 1.00$ ,  $\text{CHCl}_3$ ); The enantiomeric excess was determined by HPLC on Chiralpak AD-H column, hexane: isopropanol = 95: 5; flow rate = 1.0 mL/min; UV detection at 210 nm;  $t_R = 22.26$  min (minor), 31.65 min (major), 33.04 min (minor), 37.21 min (minor).  $^1\text{H}$  NMR (400 MHz,  $\text{CDCl}_3$ )  $\delta$  7.37 – 7.33 (m, 4H), 7.28 (m,  $J = 3.0, 2.0$  Hz, 1H), 5.46 (s, 1H), 3.38 – 3.33 (m, 4H), 3.31 (d,  $J = 1.8$  Hz, 1H), 3.18 (qd,  $J = 7.1, 1.4$  Hz, 1H), 1.67 – 1.61 (m, 6H), 1.19 (d,  $J = 7.1$  Hz, 3H).  $^{13}\text{C}$  NMR (101 MHz,  $\text{CDCl}_3$ )  $\delta$  140.22, 128.46, 127.68, 125.65, 70.65, 63.07, 47.06, 46.69, 43.70, 26.08, 25.75, 23.87, 23.85, 7.87, 6.81; ESI-HRMS Calculated for  $\text{C}_{14}\text{H}_{22}\text{NO}_3\text{S}^+$  ( $[\text{M}+\text{H}]^+$ ): 284.1315, found: 284.1311.

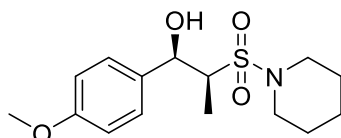

**(1R, 2S)-1-(4-methoxyphenyl)-2-(piperidin-1-ylsulfonyl) propan-1-ol (2b)**

White solid, 23.8 mg, 95% yield, 98% ee, dr= 20:1;  $[\alpha]_D^{20} = 6.8$  ( $c = 1.00$ ,  $\text{CHCl}_3$ ); The enantiomeric excess was determined by HPLC on Chiralpak AD-H column, hexane: isopropanol = 90: 10; flow rate = 1.0 mL/min; UV detection at 210 nm;  $t_R = 21.31$  min (minor), 27.08 min (major), 30.95 min (minor), 36.62 min (minor).  $^1\text{H}$  NMR (400 MHz,  $\text{CDCl}_3$ )  $\delta$  7.19 (d,  $J = 8.6$  Hz, 2H), 6.93 – 6.72 (m, 2H), 4.76 (d,  $J = 9.1$  Hz, 1H), 4.37 (d,  $J = 1.0$  Hz, 1H), 3.73 (s, 3H), 3.39 – 3.26 (m, 4H), 3.17 (tt,  $J = 9.0, 5.8$  Hz, 1H), 1.69 – 1.46 (m, 6H), 0.85 (d,  $J = 7.1$  Hz, 3H).  $^{13}\text{C}$  NMR (101 MHz,  $\text{CDCl}_3$ )  $\delta$  159.62, 132.13, 128.28, 114.00, 73.67, 63.54, 55.32, 47.24, 26.09, 23.84, 12.82; ESI-HRMS Calculated for  $\text{C}_{15}\text{H}_{24}\text{NO}_4\text{S}^+$  ( $[\text{M}+\text{H}]^+$ ): 314.1421, found: 314.1425.

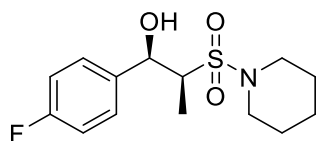

**(1R, 2S)-1-(4-fluorophenyl)-2-(piperidin-1-ylsulfonyl) propan-1-ol (2c)**

White solid, 23.1 mg, 95% yield, 99% ee, dr=20:1;  $[\alpha]_D^{20} = 1.2$  ( $c = 1.00$ ,  $\text{CHCl}_3$ ); The enantiomeric excess was determined by HPLC on Chiralpak AD-H column, hexane: isopropanol = 92: 8; flow rate = 1.0 mL/min; UV detection at 210 nm;  $t_R = 17.07$  min (minor), 20.75 min (major), 23.93 min (minor), 28.36 min (minor).  $^1\text{H}$  NMR (400 MHz,  $\text{CDCl}_3$ )  $\delta$  7.39 – 7.28 (m, 2H), 7.12 – 6.99 (m, 2H), 5.45 (s, 1H), 3.35 (m,  $J = 5.9, 4.2$  Hz, 4H), 3.27 – 3.19 (m, 1H), 3.13 (qd,  $J = 7.1, 1.3$  Hz, 1H), 1.67 – 1.61 (m, 6H), 1.17 (d,  $J = 7.1$  Hz, 3H);  $^{13}\text{C}$  NMR (101 MHz,  $\text{CDCl}_3$ )  $\delta$  162.34, 159.89, 134.85, 134.82, 126.32, 126.24, 114.41, 114.20, 69.14, 61.95, 46.03, 45.65, 42.68, 25.03, 24.71, 24.31,

22.80, 6.82, 5.70; ESI-HRMS Calculated for  $C_{14}H_{21}FNO_3S^+$  ( $[M+H]^+$ ): 302.1221, found: 302.1216.

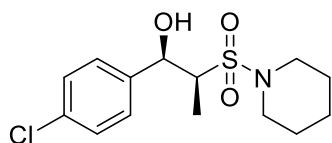

**(1R, 2S)-1-(4-chlorophenyl)-2-(piperidin-1-ylsulfonyl) propan-1-ol (2d)**

White solid, 24.2 mg, 95% yield, 98% ee, dr=20:1;  $[\alpha]_D^{20} = 8.1$  ( $c = 1.00$ ,  $CHCl_3$ ); The enantiomeric excess was determined by HPLC on Chiralpak AD-H column, hexane: isopropanol = 90: 10; flow rate = 1.0 mL/min; UV detection at 210 nm;  $t_R = 15.29$  min (minor), 17.93 min (major), 21.69 min (minor), 27.00 min (minor).  $^1H$  NMR (400 MHz,  $CDCl_3$ )  $\delta$  7.30 – 7.21 (m, 4H), 5.38 (s, 1H), 3.35 – 3.28 (m, 4H), 3.28 (m, 1H), 3.06 (qd,  $J = 7.1, 1.3$  Hz, 1H), 1.65 – 1.56 (m, 6H), 1.11 (d,  $J = 7.1$  Hz, 3H).  $^{13}C$  NMR (101 MHz,  $CDCl_3$ )  $\delta$  137.60, 132.38, 127.59, 126.04, 69.15, 61.82, 46.04, 25.03, 22.80, 5.73; ESI-HRMS Calculated for  $C_{14}H_{21}ClNO_3S^+$  ( $[M+H]^+$ ): 318.0925, found: 318.0919.

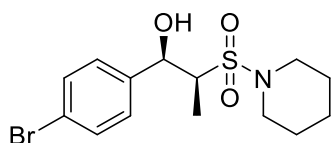

**(1R, 2S)-1-(4-bromophenyl)-2-(piperidin-1-ylsulfonyl) propan-1-ol (2e)**

White solid, 27.2 mg, 94% yield, 99% ee, dr = 20:1;  $[\alpha]_D^{20} = 9.5$  ( $c = 1.00$ ,  $CHCl_3$ ); The enantiomeric excess was determined by HPLC on Chiralpak AD-H column, hexane: isopropanol = 90: 10; flow rate = 1.0 mL/min; UV detection at 210 nm;  $t_R = 16.54$  min (minor), 19.40 min (major), 23.41 min (minor), 30.29 min (minor).  $^1H$  NMR (400 MHz,  $CDCl_3$ )  $\delta$  7.42 (d,  $J = 8.5$  Hz, 2H), 7.17 (d,  $J = 8.3$  Hz, 2H), 5.30 (d,  $J = 51.2$  Hz, 1H), 3.29 (m, 4H), 3.28 (s, 1H), 3.06 (qd,  $J = 7.1, 1.3$  Hz, 1H), 1.59 (dd,  $J = 9.8, 4.6$  Hz, 6H), 1.10 (d,  $J = 7.1$  Hz, 3H).  $^{13}C$  NMR (101 MHz,  $CDCl_3$ )  $\delta$  139.23, 131.58, 127.44, 121.54, 70.24, 62.83, 47.09, 26.08, 25.37, 23.85, 6.79; ESI-HRMS Calculated for  $C_{14}H_{21}BrNO_3S^+$  ( $[M+H]^+$ ): 362.0420, found: 362.0414.

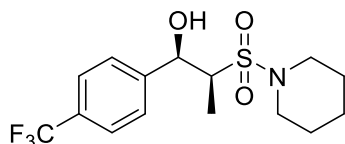

**(1R, 2S)-2-(piperidin-1-ylsulfonyl)-1-(4-(trifluoromethyl) phenyl) propan-1-ol (2f)**

White solid, 27.2 mg, 96% yield, 99% ee, dr=20:1;  $[\alpha]_D^{20} = 9.7$  ( $c = 1.00$ ,  $CHCl_3$ ); The enantiomeric excess was determined by HPLC on Chiralpak AD-H column, hexane: isopropanol = 95: 5; flow rate = 1.0 mL/min; UV detection at 210 nm;  $t_R = 23.43$  min (minor), 26.43 min (major), 33.70 min (minor), 46.38 min (minor).  $^1H$  NMR (400 MHz,  $CDCl_3$ )  $\delta$  7.56 (d,  $J = 8.2$  Hz, 2H), 7.42 (d,  $J = 8.5$  Hz, 2H), 5.46 (s, 1H), 3.38 (d,  $J = 1.7$  Hz, 1H), 3.34 – 3.25 (m, 4H), 3.11 (qd,  $J = 7.1, 1.3$  Hz, 1H), 1.64 – 1.55 (m, 6H), 1.10 (d,  $J = 7.1$  Hz, 3H).  $^{13}C$  NMR (101 MHz,  $CDCl_3$ )  $\delta$  144.24, 130.08, 129.76, 126.11,

125.48, 125.45, 125.41, 125.37, 122.69, 77.38, 77.27, 77.07, 76.75, 70.34, 62.78, 47.12, 46.70, 26.07, 25.75, 25.35, 23.83, 6.84; ESI-HRMS Calculated for  $C_{15}H_{21}F_3NO_3S^+$  ( $[M+H]^+$ ): 352.1189, found: 352.1183.

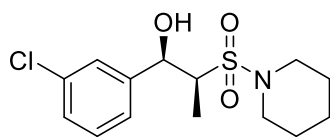

**(1R, 2S)-1-(3-chlorophenyl)-2-(piperidin-1-ylsulfonyl) propan-1-ol (2g)**

White solid, 24.2 mg, 95% yield, 99% ee, dr=20:1;  $[\alpha]_D^{20} = 11.3$  ( $c = 1.00$ ,  $CHCl_3$ ); The enantiomeric excess was determined by HPLC on Chiralpak IB column, hexane: isopropanol = 97: 3; flow rate = 1.0 mL/min; UV detection at 210 nm;  $t_R = 19.20$  min (major), 23.29 min (minor), 26.76 min (minor), 32.71 min (minor).  $^1H$  NMR (400 MHz,  $CDCl_3$ )  $\delta$  7.29 – 7.22 (m, 4H), 5.38 (s, 1H), 3.33 – 3.28 (m, 4H), 3.28 (s, 1H), 3.06 (qd,  $J = 7.1, 1.3$  Hz, 1H), 1.65 – 1.56 (m, 6H), 1.11 (d,  $J = 7.1$  Hz, 3H);  $^{13}C$  NMR (101 MHz,  $CDCl_3$ )  $\delta$  142.29, 134.51, 129.77, 127.88, 125.94, 123.84, 70.18, 62.82, 47.11, 26.08, 23.85, 6.84; ESI-HRMS Calculated for  $C_{14}H_{21}ClNO_3S^+$  ( $[M+H]^+$ ): 318.0925, found: 318.0921.

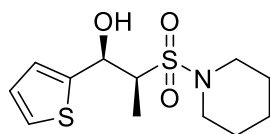

**(1S, 2S)-2-(piperidin-1-ylsulfonyl)-1-(thiophen-2-yl) propan-1-ol (2h)**

White solid, 21.5 mg, 93% yield, 99% ee, dr=20:1;  $[\alpha]_D^{20} = 14.3$  ( $c = 1.00$ ,  $CHCl_3$ ); The enantiomeric excess was determined by HPLC on Chiralpak IB column, hexane: isopropanol = 95: 5; flow rate = 1.0 mL/min; UV detection at 210 nm;  $t_R = 14.82$  min (major), 16.15 min (minor), 18.56 min (minor), 19.78 min (minor).  $^1H$  NMR (400 MHz,  $CDCl_3$ )  $\delta$  7.27 (m,  $J = 1.2$  Hz, 1H), 7.26 (d,  $J = 1.2$  Hz, 1H), 7.05 – 6.93 (m, 2H), 5.71 (s, 1H), 3.38 (m, 4H), 3.35 (s, 1H), 3.28 (qd,  $J = 7.1, 1.4$  Hz, 1H), 1.65 (m, 6H), 1.34 (d,  $J = 7.1$  Hz, 3H).  $^{13}C$  NMR (101 MHz,  $CDCl_3$ )  $\delta$  143.89, 126.88, 124.69, 123.43, 68.44, 63.17, 47.07, 26.06, 23.85, 7.46; ESI-HRMS Calculated for  $C_{12}H_{20}NO_3S_2^+$  ( $[M+H]^+$ ): 290.0879, found: 290.0873.

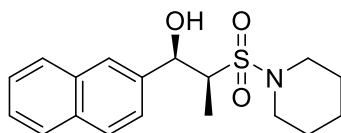

**(1R, 2S)-1-(naphthalen-2-yl)-2-(piperidin-1-ylsulfonyl) propan-1-ol (2i)**

White solid, 25.1 mg, 94% yield, 99% ee, dr=20:1;  $[\alpha]_D^{20} = 14.3$  ( $c = 1.00$ ,  $CHCl_3$ ); The enantiomeric excess was determined by HPLC on Chiralpak IB column, hexane: isopropanol = 90: 10; flow rate = 1.0 mL/min; UV detection at 210 nm;  $t_R = 14.20$  min (major), 15.11 min (minor), 18.21 min (minor), 23.56 min (minor).  $^1H$  NMR (400 MHz,  $CDCl_3$ )  $\delta$  7.91 – 7.82 (m, 4H), 7.53 – 7.45 (m, 2H), 7.39 (dd,  $J = 8.5, 1.6$  Hz, 1H), 5.65

(s, 1H), 3.43 (d,  $J = 1.7$  Hz, 1H), 3.42 – 3.36 (m, 4H), 3.30 (tt,  $J = 7.1, 3.5$  Hz, 1H), 1.74 – 1.64 (m, 6H), 1.22 (d,  $J = 7.1$  Hz, 3H).  $^{13}\text{C}$  NMR (101 MHz,  $\text{CDCl}_3$ )  $\delta$  137.50, 133.21, 132.86, 128.25, 128.07, 127.71, 126.39, 126.10, 124.69, 123.51, 70.80, 62.92, 47.13, 46.71, 26.11, 25.76, 23.89, 6.88; ESI-HRMS Calculated for  $\text{C}_{18}\text{H}_{24}\text{NO}_3\text{S}^+$  ( $[\text{M}+\text{H}]^+$ ): 334.1471, found: 334.1466.

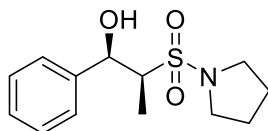

**(1R, 2S)-1-phenyl-2-(pyrrolidin-1-ylsulfonyl) propan-1-ol (2j)**

White solid, 20.6 mg, 95% yield, 99% ee, dr=20:1;  $[\alpha]_{\text{D}}^{20} = 4.0$  ( $c = 1.00$ ,  $\text{CHCl}_3$ ); The enantiomeric excess was determined by HPLC on Chiralpak IB column, hexane: isopropanol = 95: 5; flow rate = 1.0 mL/min; UV detection at 210 nm;  $t_{\text{R}} = 16.08$  min (major), 19.34 min (minor), 20.76 min (minor), 24.66 min (minor).  $^1\text{H}$  NMR (400 MHz,  $\text{CDCl}_3$ )  $\delta$  7.37 (d,  $J = 4.4$  Hz, 4H), 7.33 – 7.26 (m, 1H), 5.50 (s, 1H), 3.53 – 3.43 (m, 4H), 3.39 (m,  $J = 1.2$  Hz, 1H), 3.28 (qd,  $J = 7.1, 1.3$  Hz, 1H), 2.01 – 1.96 (m, 4H), 1.24 (d,  $J = 7.1$  Hz, 3H).  $^{13}\text{C}$  NMR (101 MHz,  $\text{CDCl}_3$ )  $\delta$  140.21, 128.46, 127.68, 125.66, 70.63, 64.44, 63.14, 48.25, 26.08, 25.36, 6.72; ESI-HRMS Calculated for  $\text{C}_{13}\text{H}_{20}\text{NO}_3\text{S}^+$  ( $[\text{M}+\text{H}]^+$ ): 270.1158, found: 270.1163.

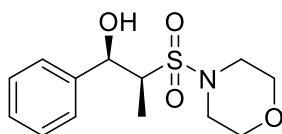

**(1R, 2S)-2-(morpholinosulfonyl)-1-phenylpropan-1-ol (2k)**

White solid, 19.9 mg, 96% yield, 99% ee, dr=20:1;  $[\alpha]_{\text{D}}^{20} = 2.8$  ( $c = 1.00$ ,  $\text{CHCl}_3$ ); The enantiomeric excess was determined by HPLC on Chiralpak IB column, hexane: isopropanol = 95: 5; flow rate = 1.0 mL/min; UV detection at 210 nm;  $t_{\text{R}} = 27.81$  min (major), 31.88 min (minor), 34.27 min (minor), 39.55 min (minor).  $^1\text{H}$  NMR (400 MHz,  $\text{CDCl}_3$ )  $\delta$  7.36 – 7.22 (m, 5H), 5.43 (s, 1H), 3.70 (t,  $J = 4.7$  Hz, 4H), 3.35 (m, 4H), 3.15 (m,  $J = 7.0, 3.5$  Hz, 1H), 3.05 (s, 1H), 1.14 (d,  $J = 6.1$  Hz, 3H).  $^{13}\text{C}$  NMR (101 MHz,  $\text{CDCl}_3$ )  $\delta$  140.03, 128.56, 127.88, 125.64, 70.68, 66.98, 63.57, 46.31, 25.37, 6.91; ESI-HRMS Calculated for  $\text{C}_{13}\text{H}_{20}\text{NO}_4\text{S}^+$  ( $[\text{M}+\text{H}]^+$ ): 286.1108, found: 286.1111.

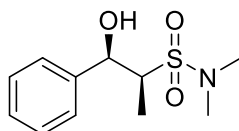

**(1R, 2S)-1-hydroxy-N, N-dimethyl-1-phenylpropane-2-sulfonamide (2l)**

White solid, 19.0 mg, 97% yield, 99% ee, dr=20:1;  $[\alpha]_{\text{D}}^{20} = 3.3$  ( $c = 1.00$ ,  $\text{CHCl}_3$ ); The enantiomeric excess was determined by HPLC on Chiralpak IB column, hexane: isopropanol = 95: 5; flow rate = 1.0 mL/min; UV detection at 210 nm;  $t_{\text{R}} = 17.18$  min (major), 21.09 min (minor), 23.06 min (minor), 28.65 min (minor).  $^1\text{H}$  NMR (400 MHz,

CDCl<sub>3</sub>)  $\delta$  7.38 (d,  $J$  = 4.4 Hz, 4H), 7.30 (dd,  $J$  = 8.8, 4.5 Hz, 1H), 5.49 (s, 1H), 3.28 (qd,  $J$  = 7.1, 1.1 Hz, 1H), 3.24 (d,  $J$  = 1.7 Hz, 1H), 2.99 (d,  $J$  = 5.6 Hz, 6H), 1.21 (d,  $J$  = 7.1 Hz, 3H). <sup>13</sup>C NMR (101 MHz, CDCl<sub>3</sub>)  $\delta$  140.06, 128.50, 127.76, 125.68, 70.69, 62.86, 37.82, 6.85; ESI-HRMS Calculated for C<sub>11</sub>H<sub>16</sub>NO<sub>3</sub>S<sup>+</sup> ([M+H]<sup>+</sup>): 242.0845, found: 242.0841.

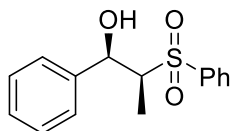

**(1R, 2S)-1-phenyl-2-(phenylsulfonyl)propan-1-ol (2m)**

White solid, 21.1 mg, 95% yield, 99% ee, dr=20:1; [ $\alpha$ ]<sub>D</sub><sup>20</sup> = -11.5 ( $c$  = 1.00, acetone); The enantiomeric excess was determined by HPLC on Chiralpak AD-H column, hexane: isopropanol = 90: 10; flow rate = 1.0 mL/min; UV detection at 210 nm;  $t_R$  = 18.19 min (minor), 25.32 min (major), 31.53 min (minor), 34.37 min (minor). <sup>1</sup>H NMR (400 MHz, CDCl<sub>3</sub>)  $\delta$  8.07 – 7.90 (m, 2H), 7.73 (t,  $J$  = 7.4 Hz, 1H), 7.64 (t,  $J$  = 7.6 Hz, 2H), 7.34 (dd,  $J$  = 10.4, 4.4 Hz, 2H), 7.28 (s, 3H), 5.54 (s, 1H), 3.31 (d,  $J$  = 1.9 Hz, 1H), 3.23 (qd,  $J$  = 7.1, 1.1 Hz, 1H), 1.22 (d,  $J$  = 7.1 Hz, 3H). <sup>13</sup>C NMR (101 MHz, CDCl<sub>3</sub>)  $\delta$  139.81, 137.29, 134.18, 129.45, 128.76, 128.49, 127.80, 125.57, 69.24, 65.66, 64.48, 25.38, 5.80.

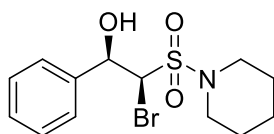

**(1R, 2S)-2-bromo-1-phenyl-2-(piperidin-1-ylsulfonyl)ethan-1-ol (2n)**

White solid, 25.2 mg, 90% yield, 99% ee, dr=10:1; [ $\alpha$ ]<sub>D</sub><sup>20</sup> = -28.2 ( $c$  = 1.00, CHCl<sub>3</sub>); The enantiomeric excess was determined by HPLC on Chiralpak AD-H column, hexane: isopropanol = 90: 10; flow rate = 1.0 mL/min; UV detection at 210 nm;  $t_R$  = 23.11 min (major), 24.45 min (minor), 26.74 min (minor), 28.73 min (minor). <sup>1</sup>H NMR (400 MHz, CDCl<sub>3</sub>)  $\delta$  7.43 – 7.32 (m, 5H), 5.31 (m, 1H), 3.69 (s, 1H), 3.26 (m, 4H), 3.12 (dd,  $J$  = 14.0, 2.0 Hz, 1H), 1.65 (m, 6H). <sup>13</sup>C NMR (101 MHz, CDCl<sub>3</sub>)  $\delta$  141.09, 128.84, 128.46, 128.33, 126.11, 125.68, 68.80, 57.07, 46.63, 25.56, 23.69; ESI-HRMS Calculated for C<sub>13</sub>H<sub>19</sub>BrNO<sub>3</sub>S<sup>+</sup> ([M+H]<sup>+</sup>): 348.0264, found: 348.0267.

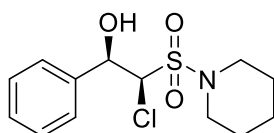

**(1R, 2S)-2-chloro-1-phenyl-2-(piperidin-1-ylsulfonyl)ethan-1-ol (2o)**

White solid, 22.3 mg, 92% yield, 99% ee, dr=20:1; [ $\alpha$ ]<sub>D</sub><sup>20</sup> = 6.4 ( $c$  = 1.00, CHCl<sub>3</sub>); The enantiomeric excess was determined by HPLC on Chiralpak IA column, hexane: isopropanol = 95: 5; flow rate = 1.0 mL/min; UV detection at 210 nm;  $t_R$  = 24.88 min (minor), 30.27 min (major), 37.74 min (minor), 46.31 min (minor). <sup>1</sup>H NMR (400 MHz,

CDCl<sub>3</sub>)  $\delta$  7.47 – 7.32 (m, 5H), 5.65 (s, 1H), 4.80 (d,  $J$  = 1.2 Hz, 1H), 3.56 – 3.41 (m, 4H), 3.39 (s, 1H), 1.71 – 1.60 (m, 6H). <sup>13</sup>C NMR (101 MHz, CDCl<sub>3</sub>)  $\delta$  138.29, 128.50, 126.26, 71.16, 47.88, 25.90, 23.67. ESI-HRMS Calculated for C<sub>13</sub>H<sub>19</sub>ClNO<sub>3</sub>S<sup>+</sup> ([M+H]<sup>+</sup>): 304.0769, found: 304.0772.

### 3. NMR spectra

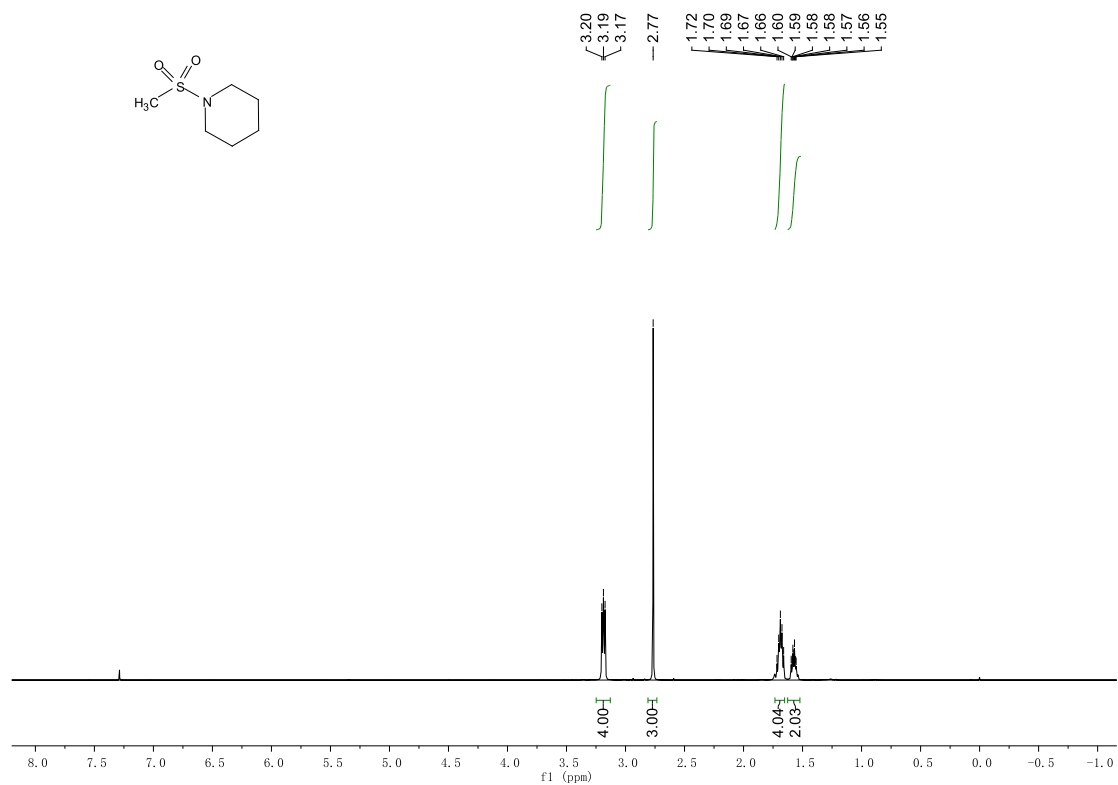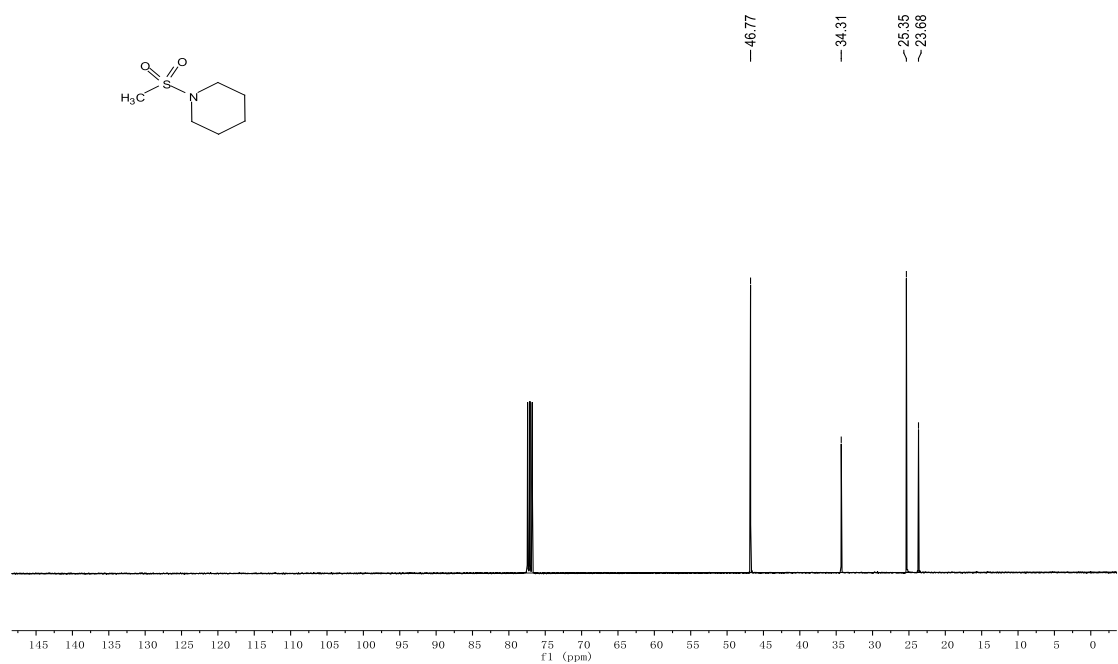

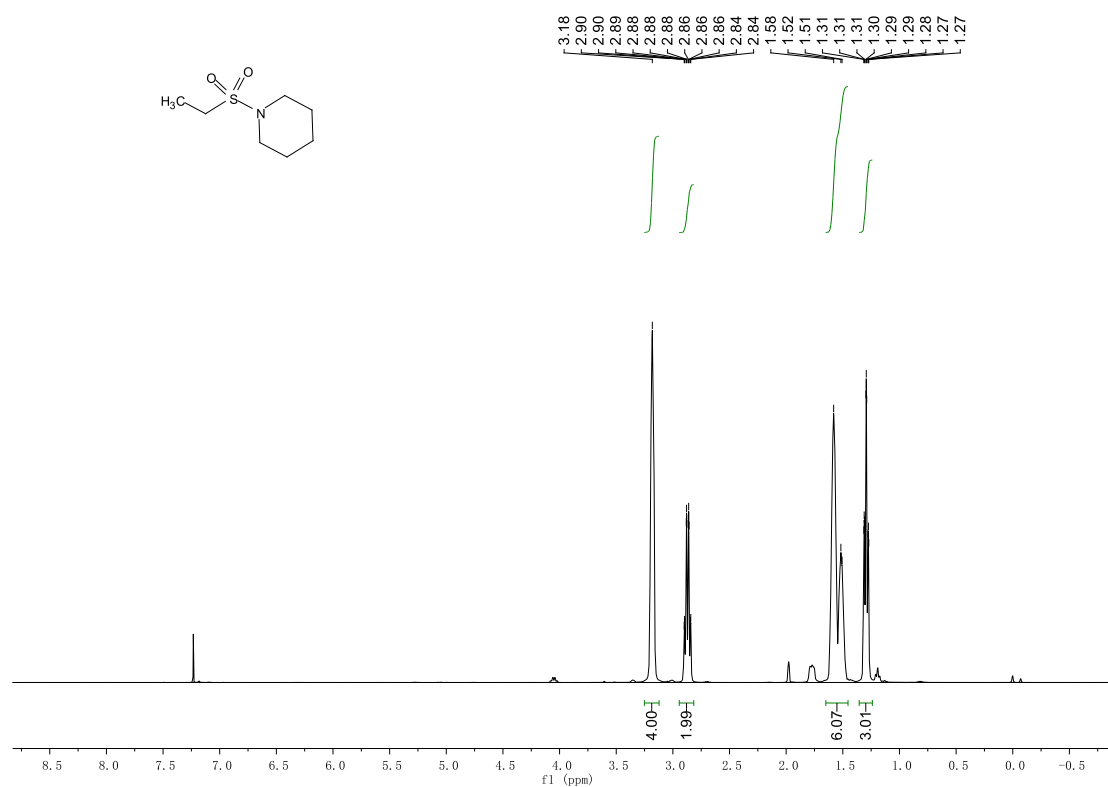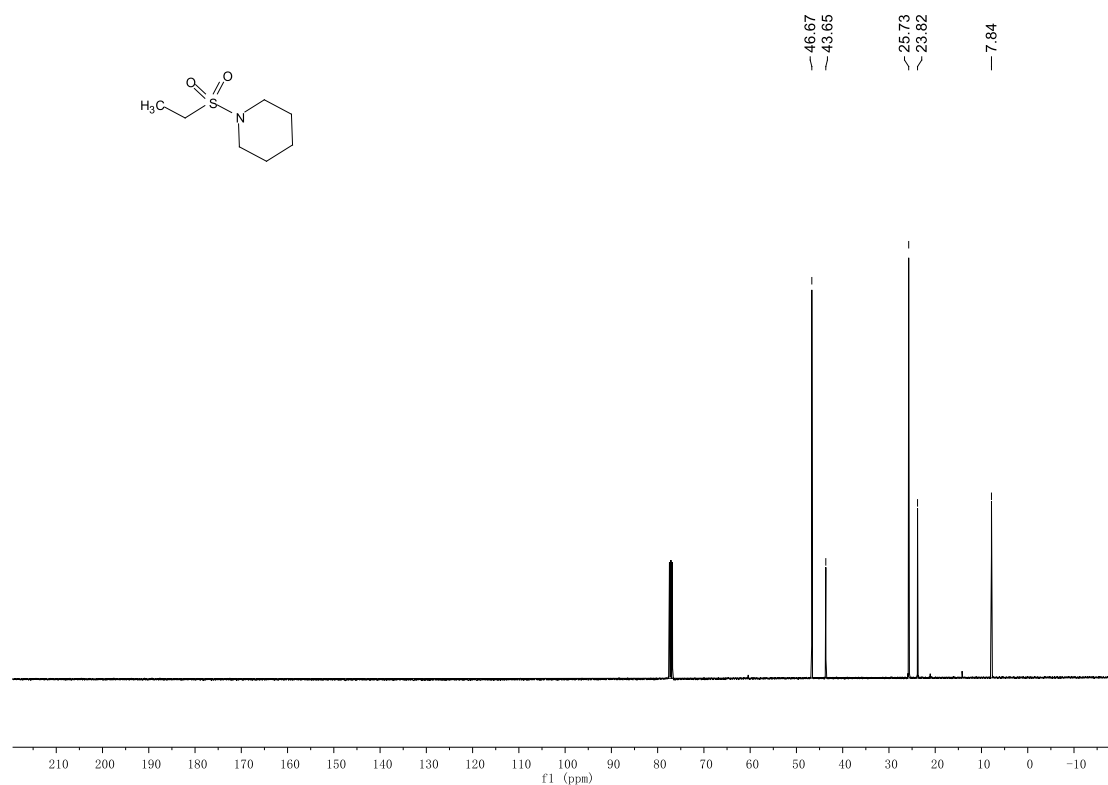

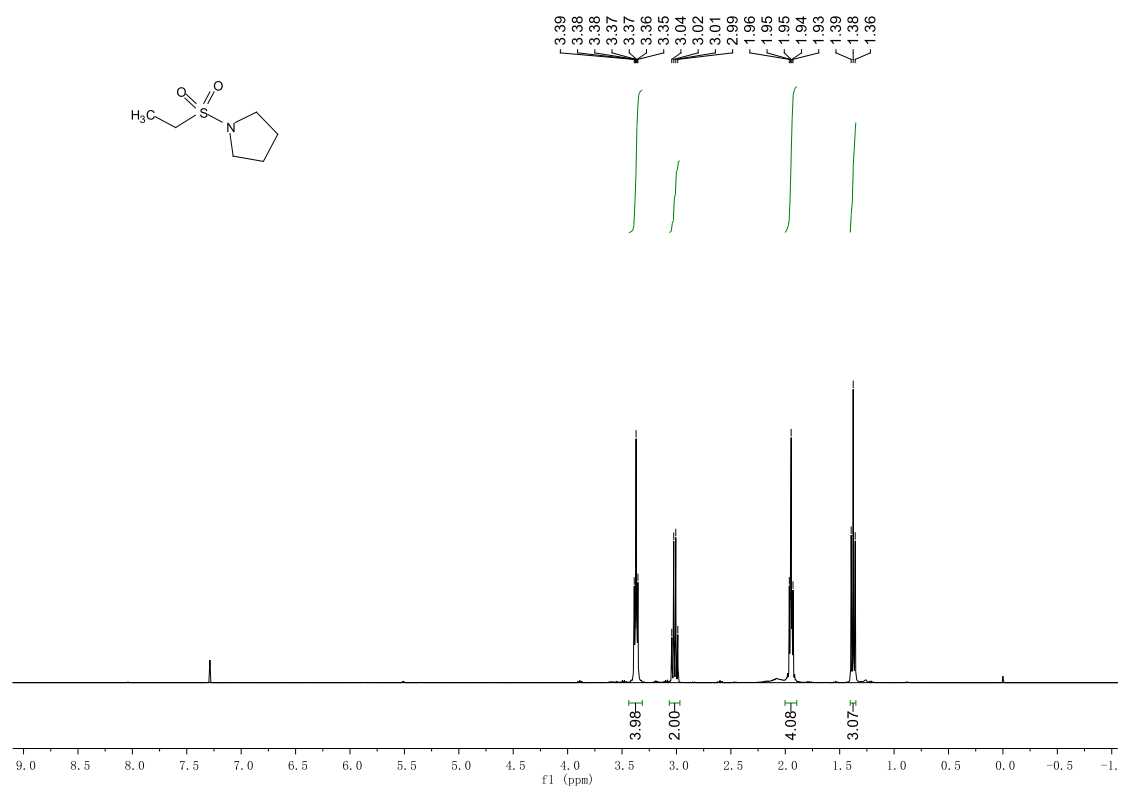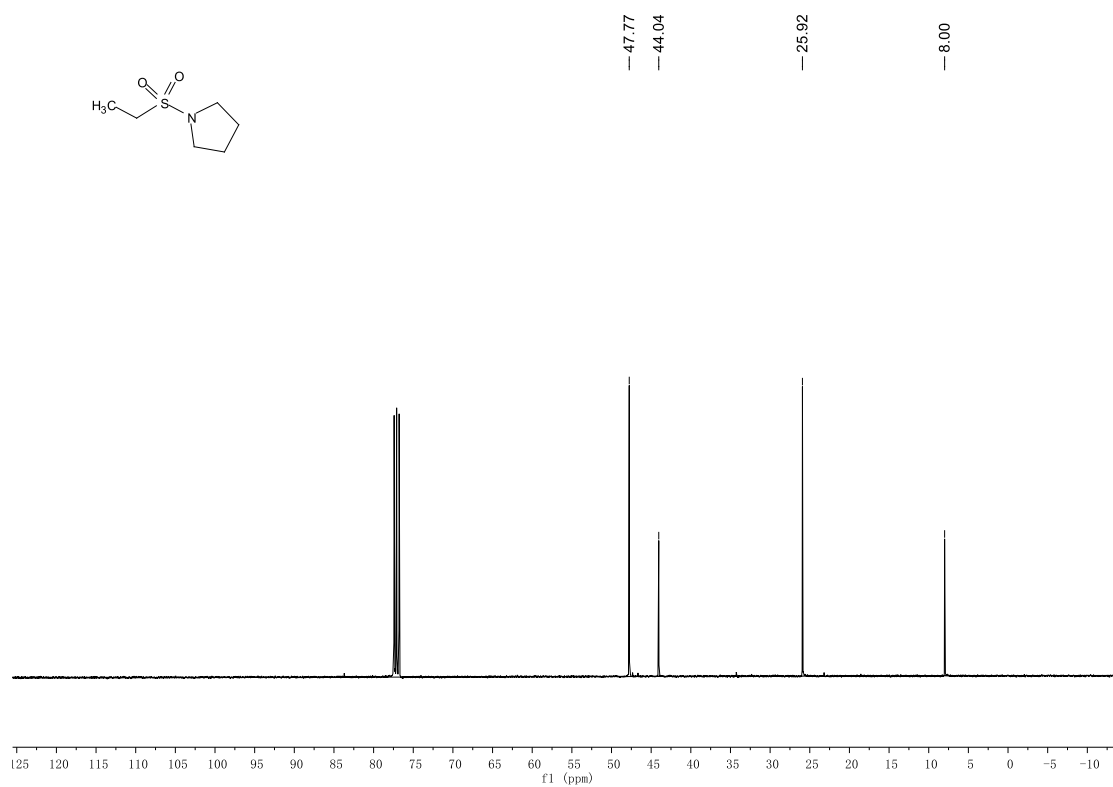



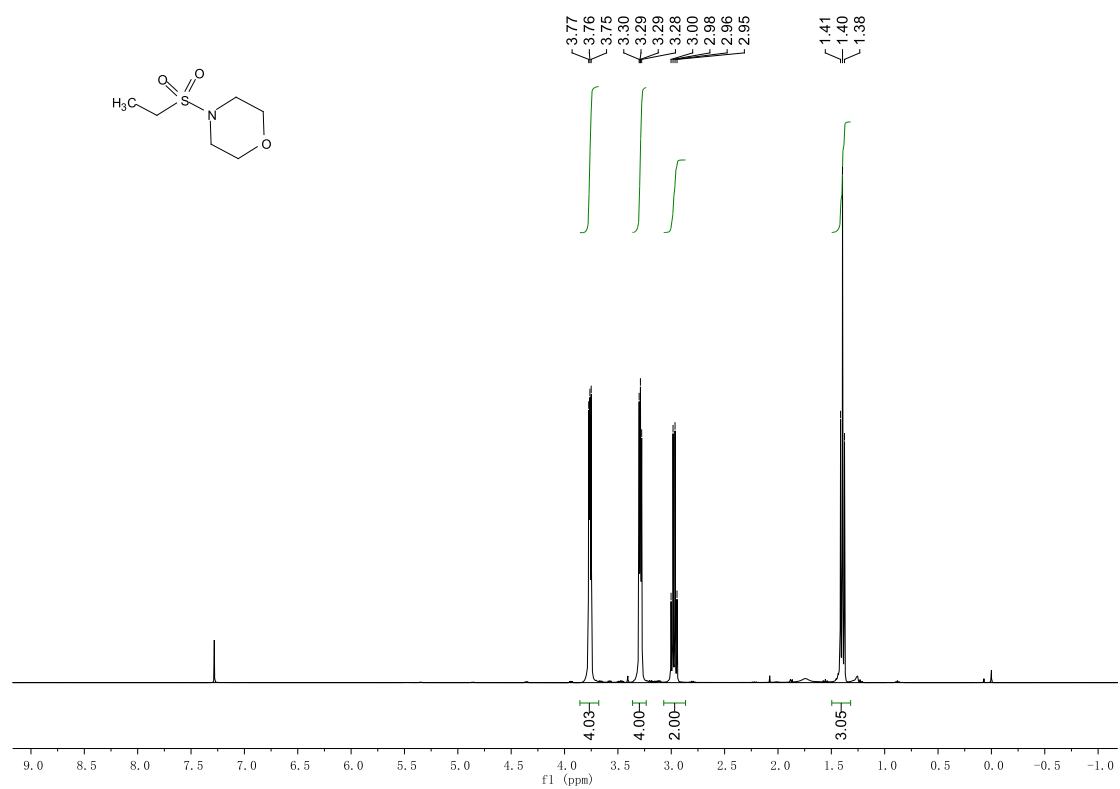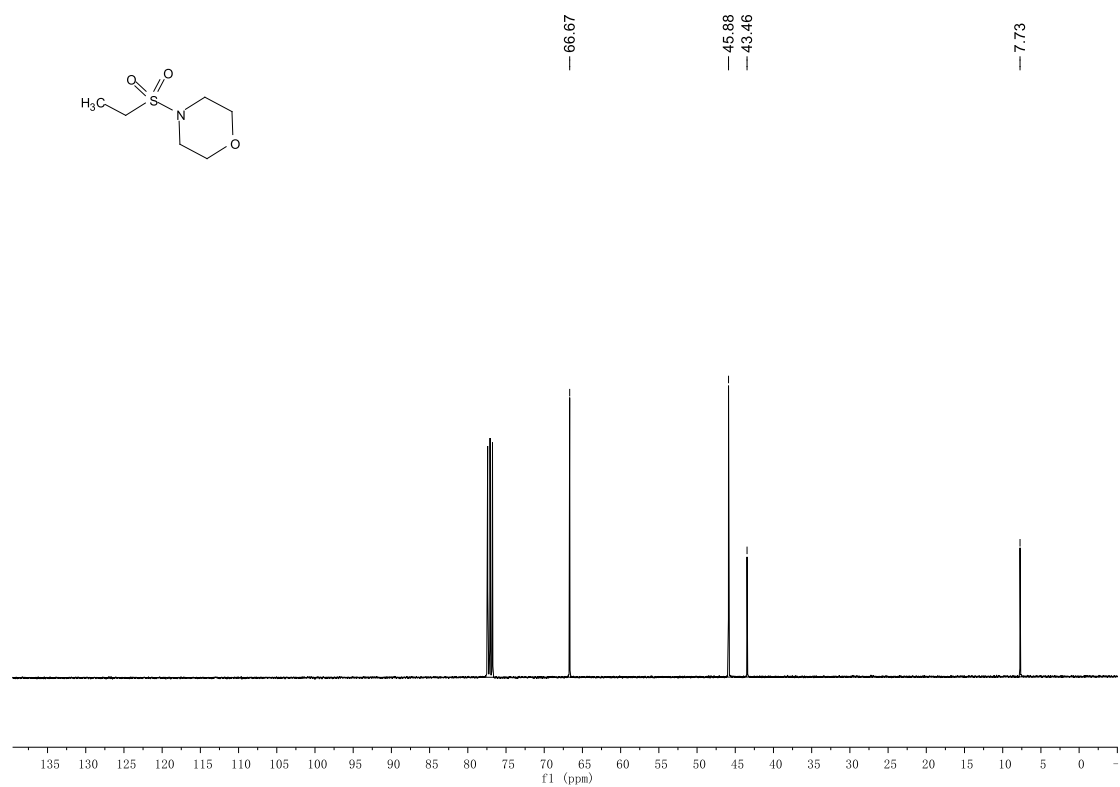

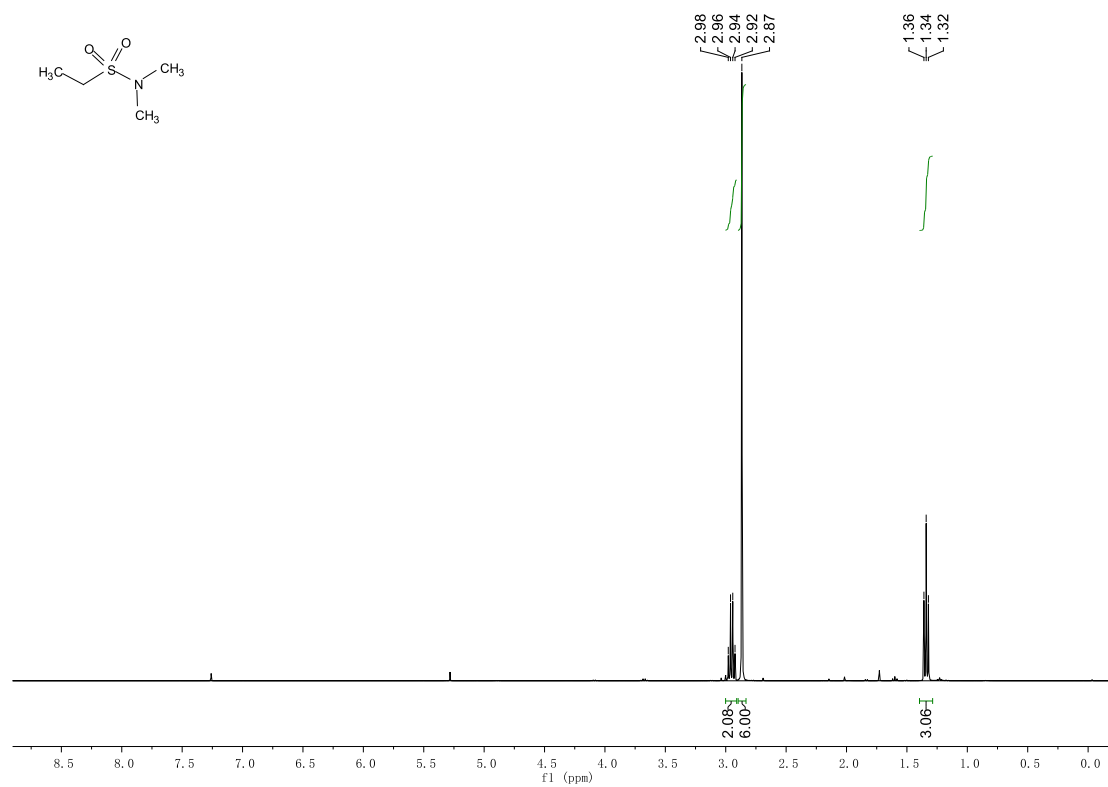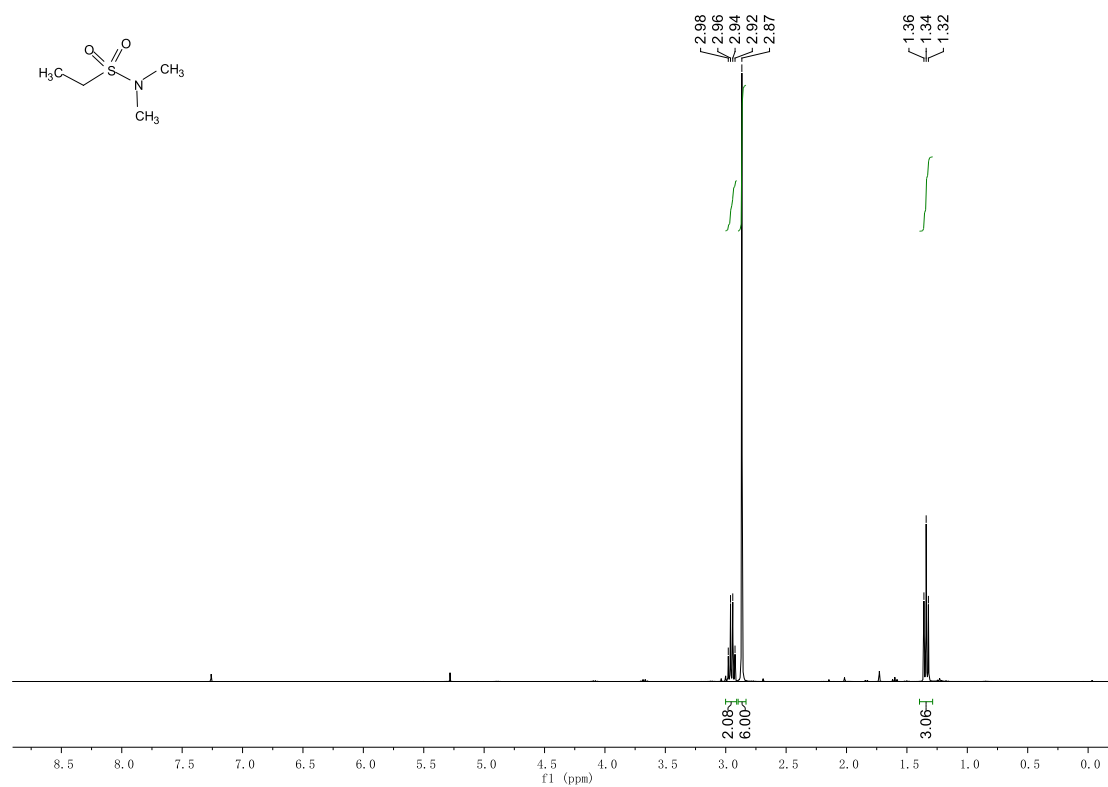

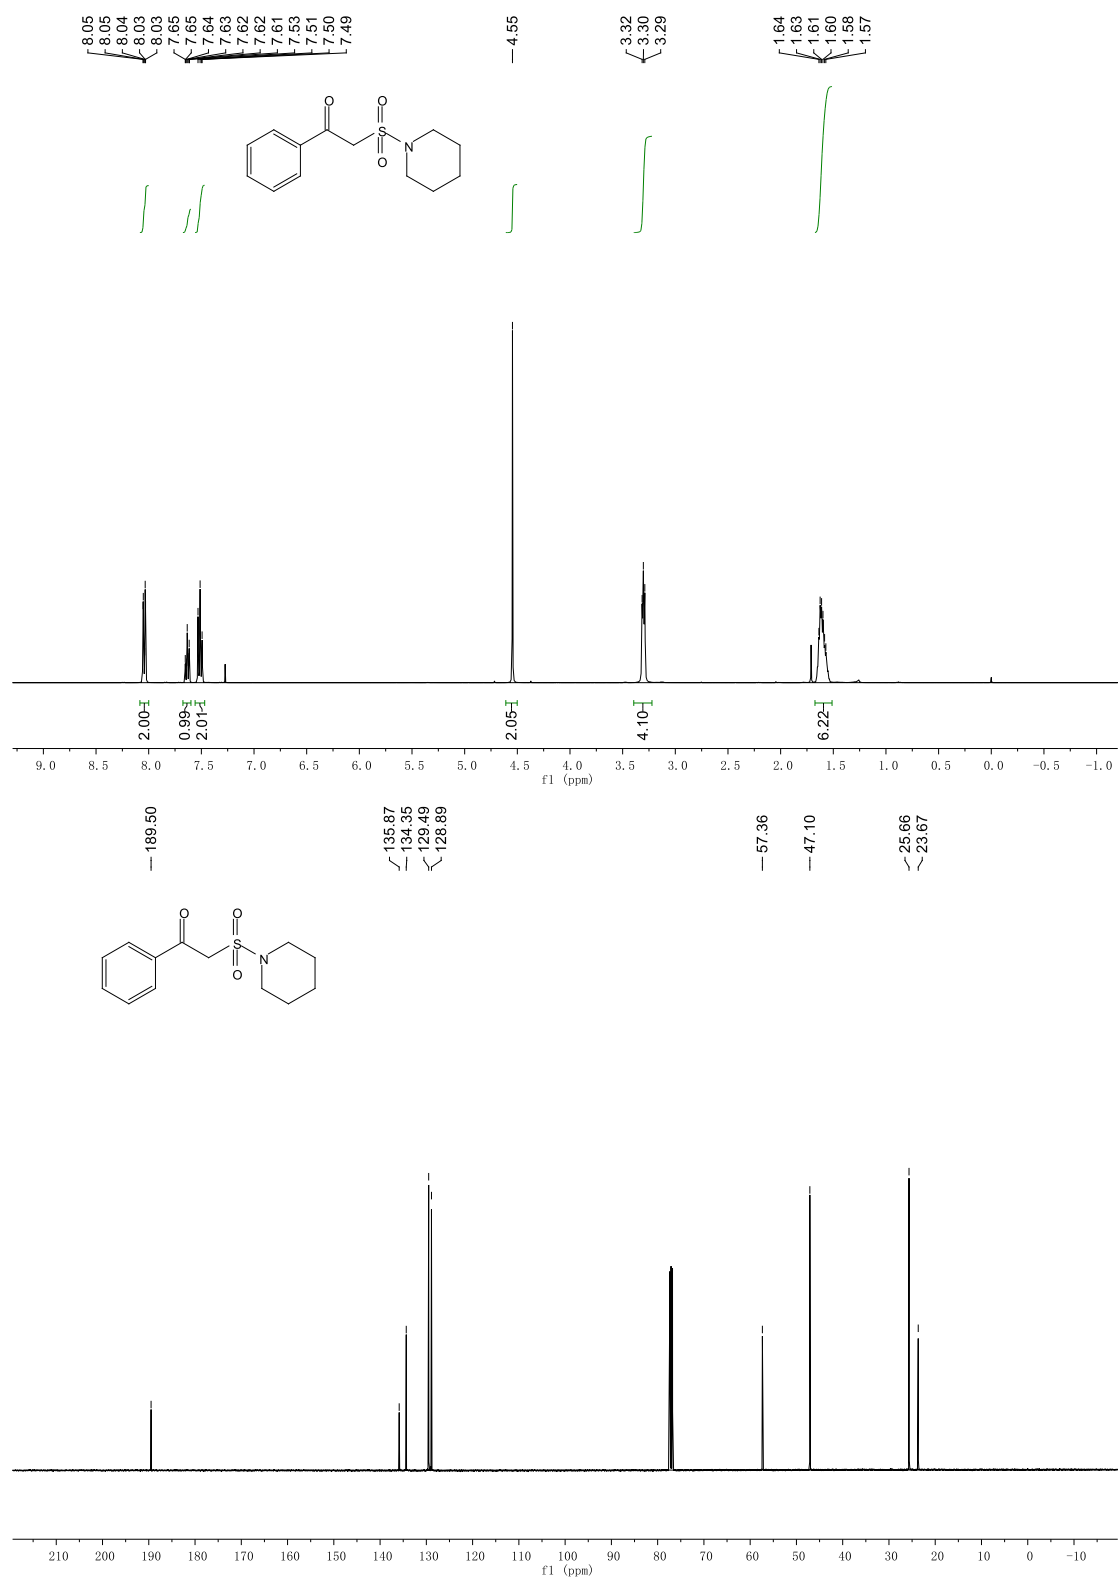

NMR spectra of **1a**

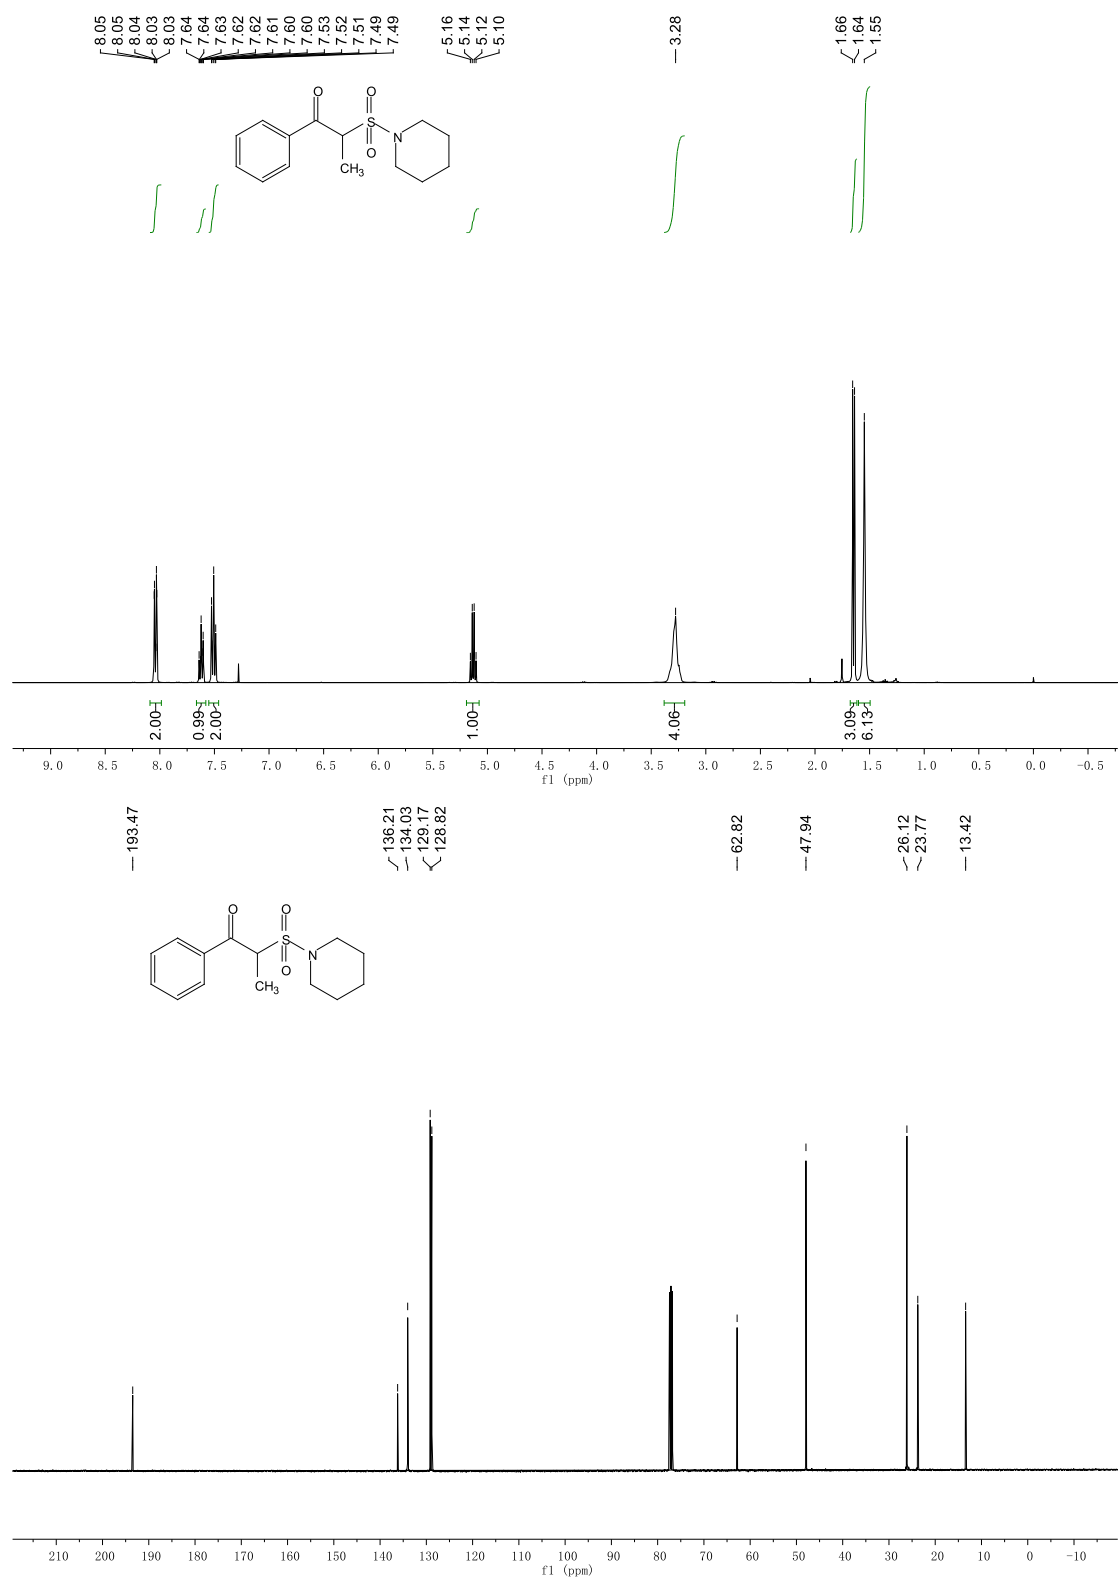

NMR spectra of **1b**

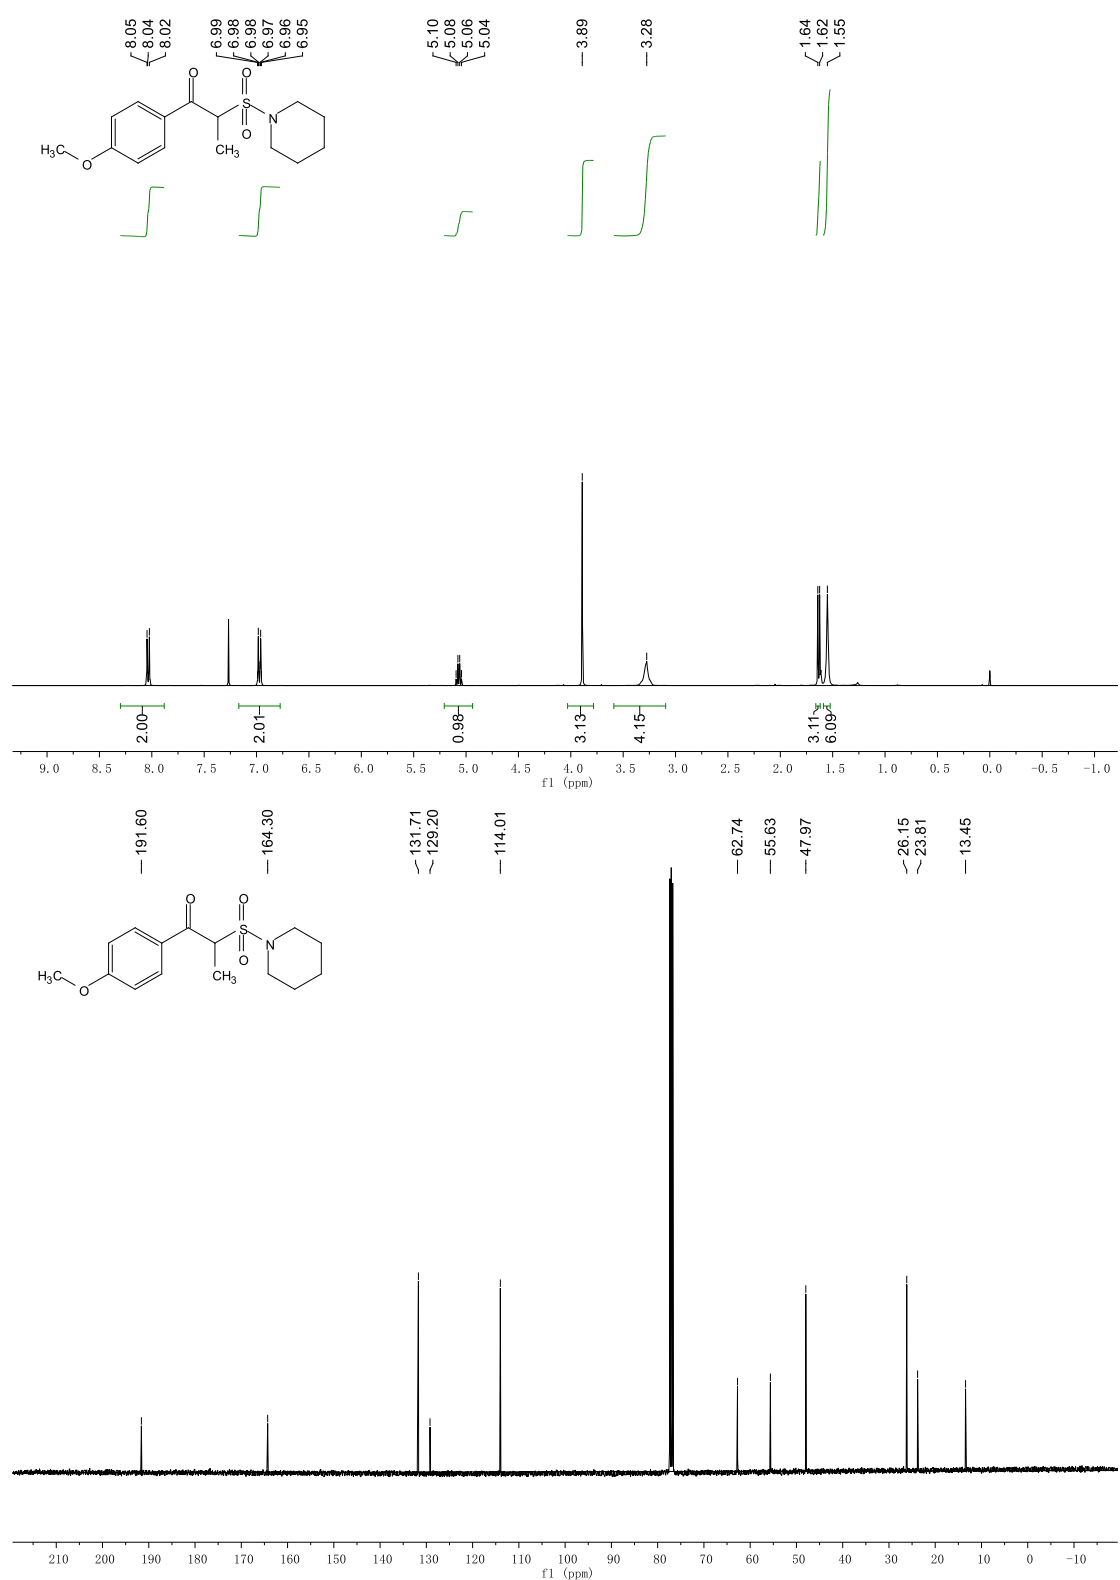

NMR spectra of **1c**

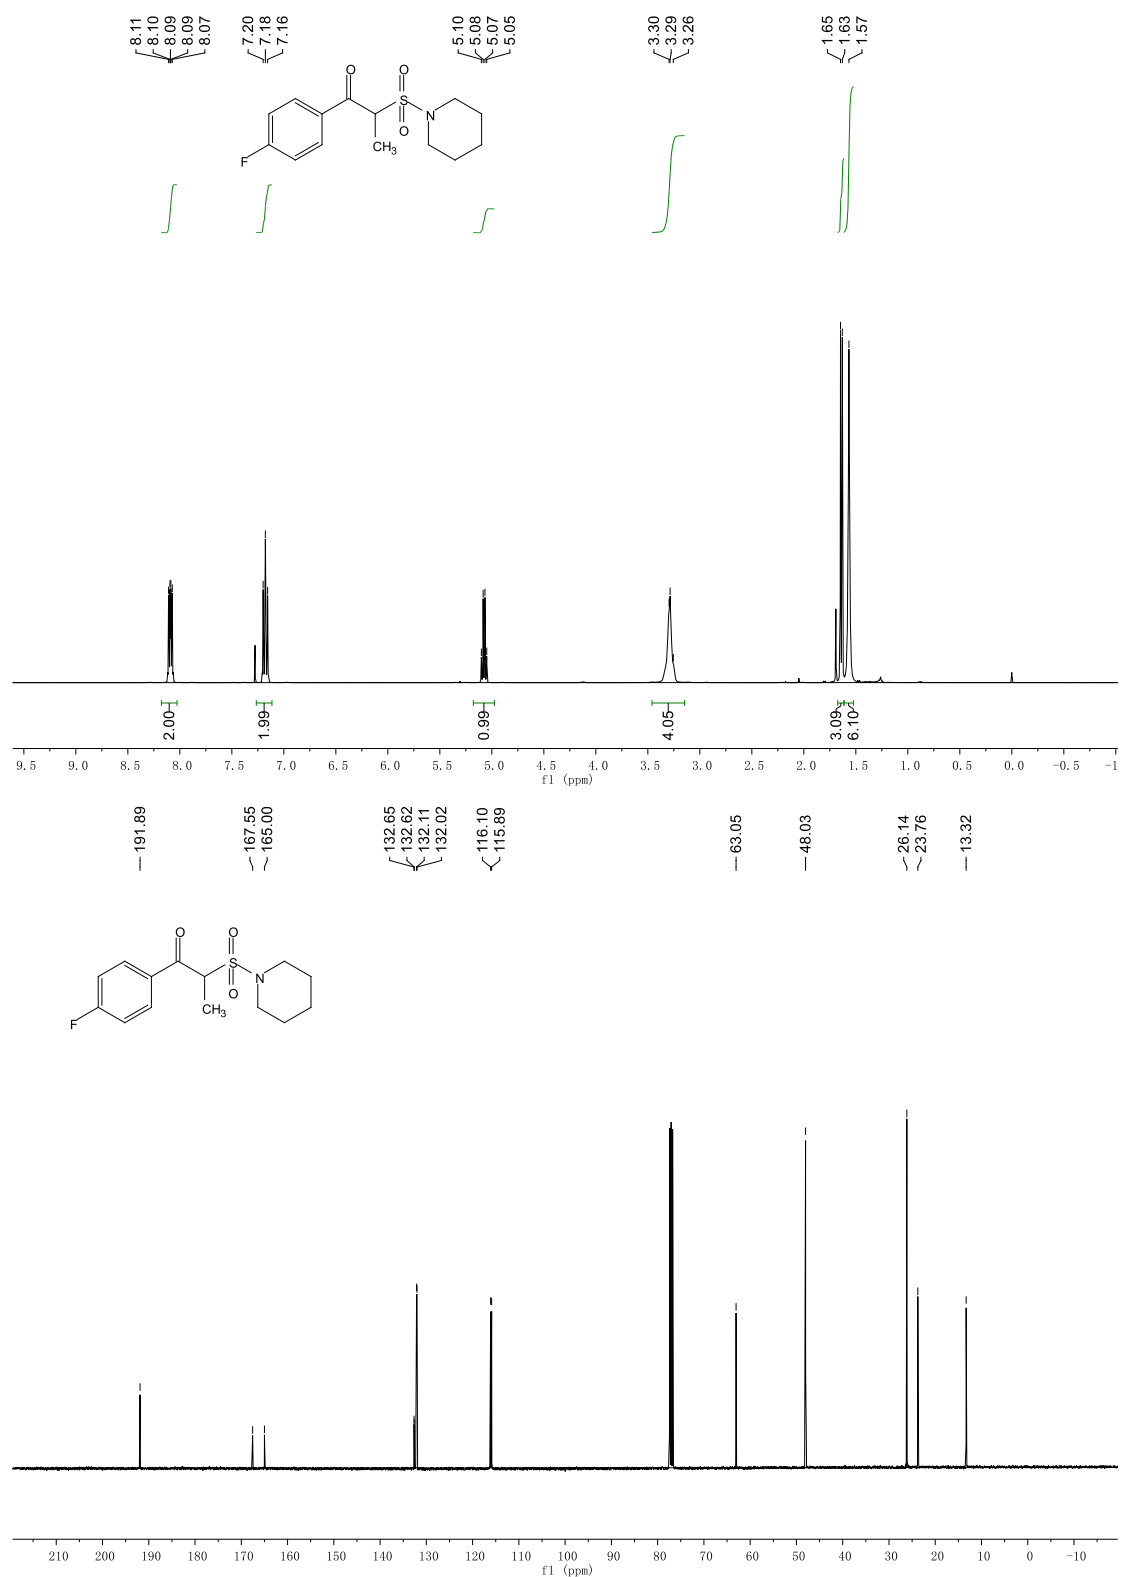

NMR spectra of **1d**

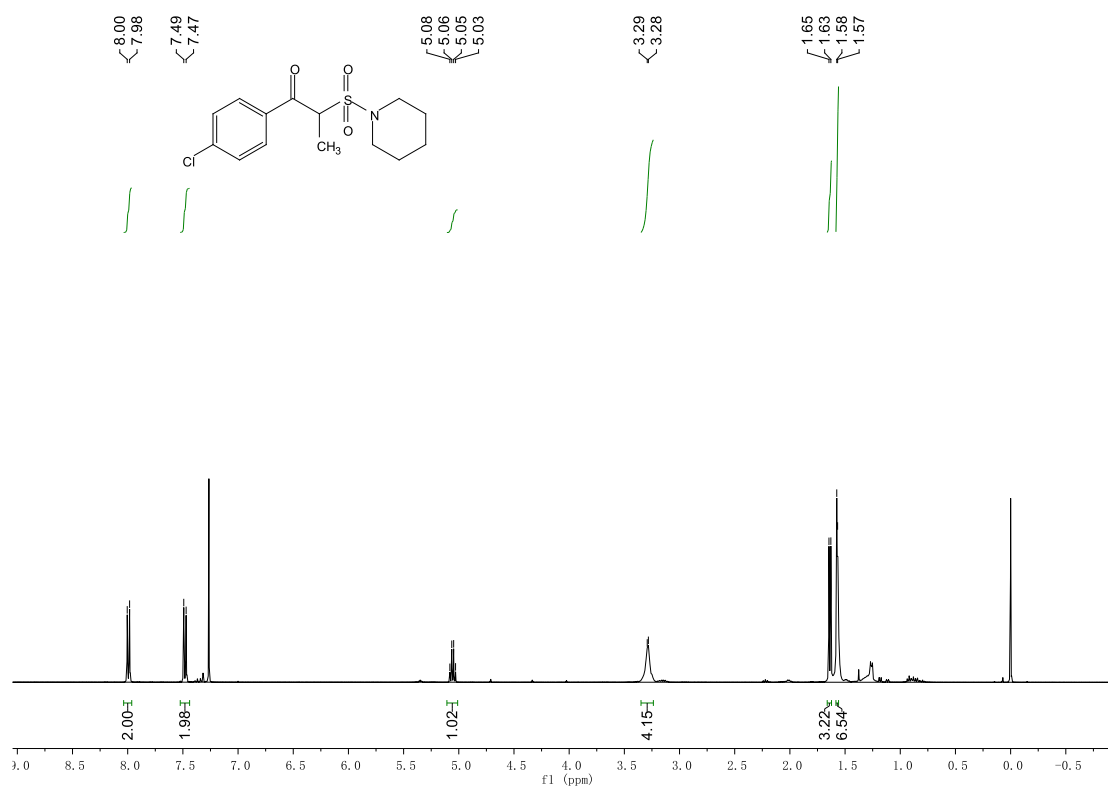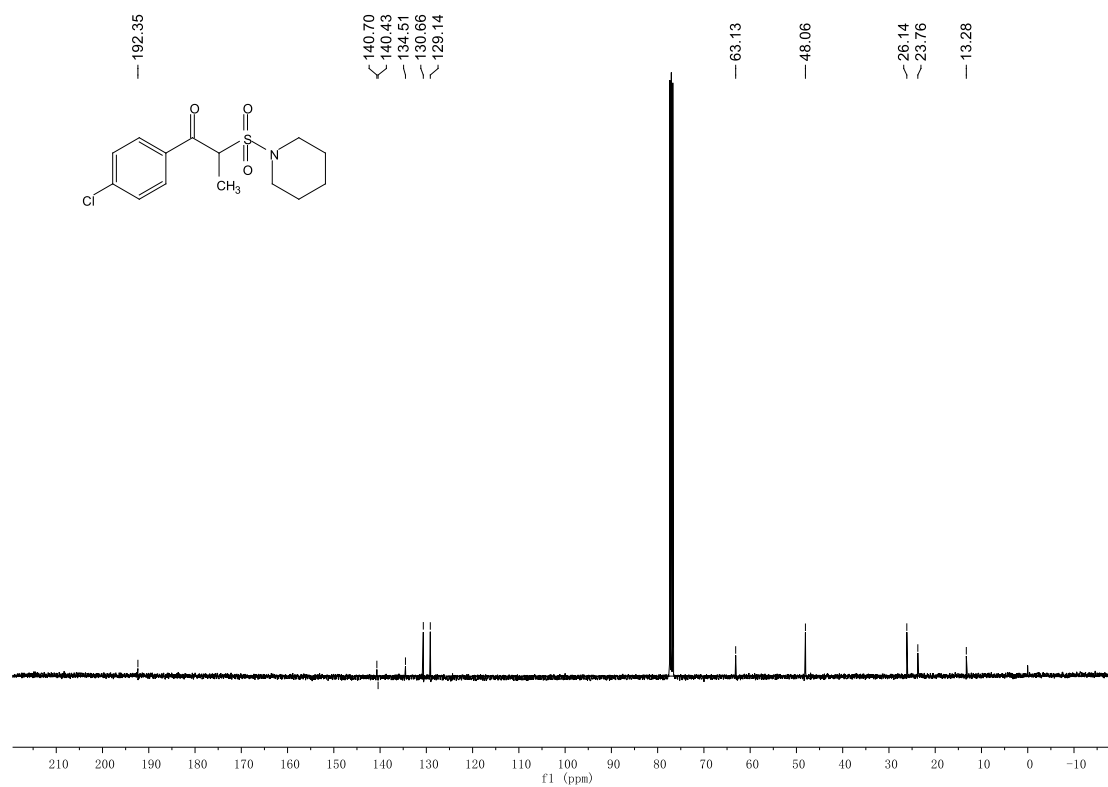

NMR spectra of **1e**

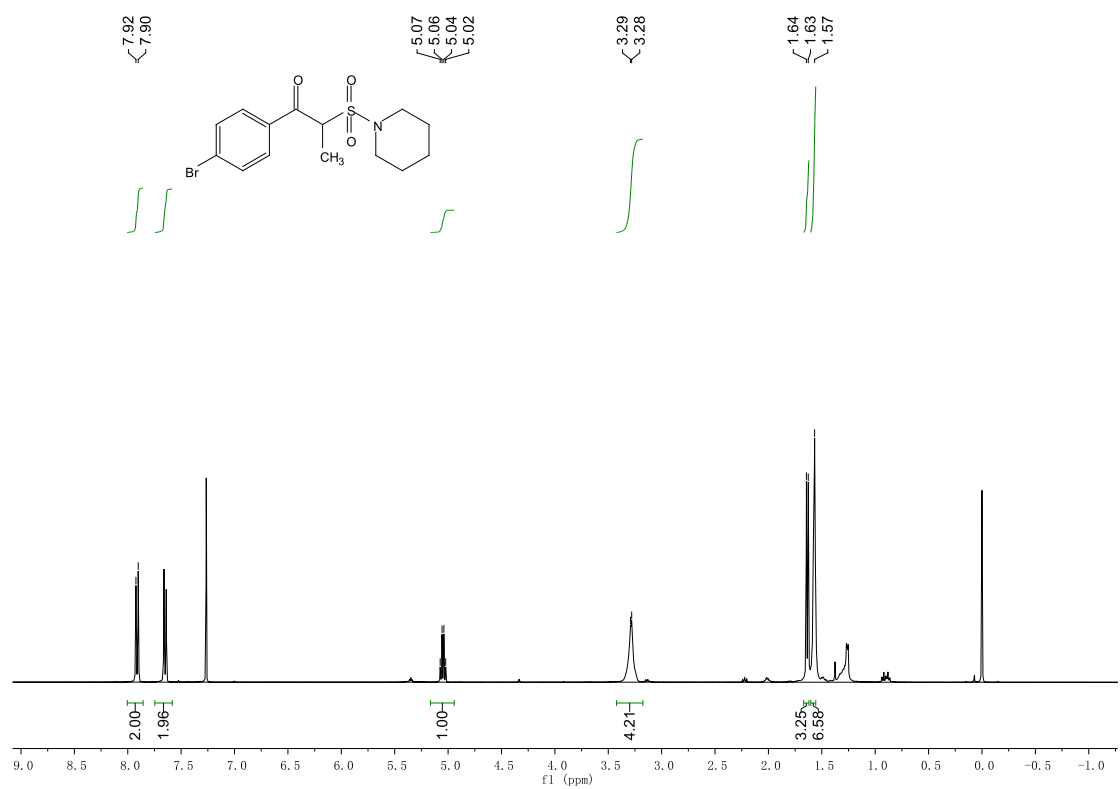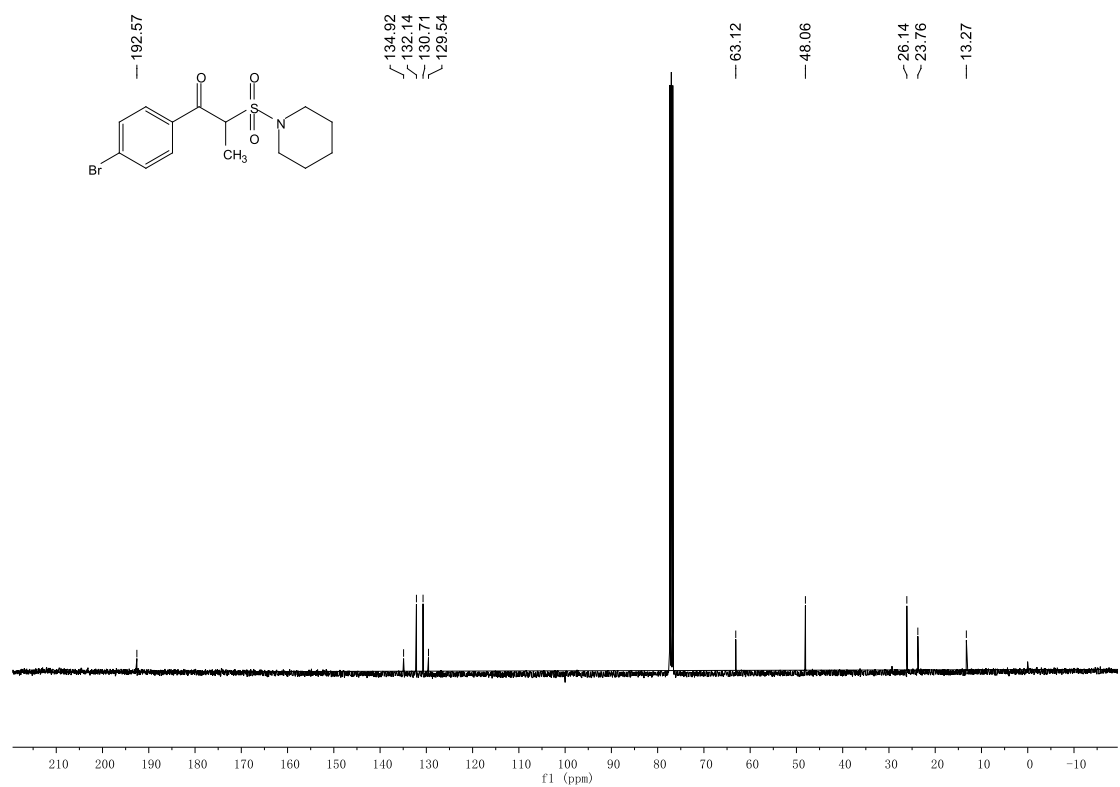

NMR spectra of **1f**



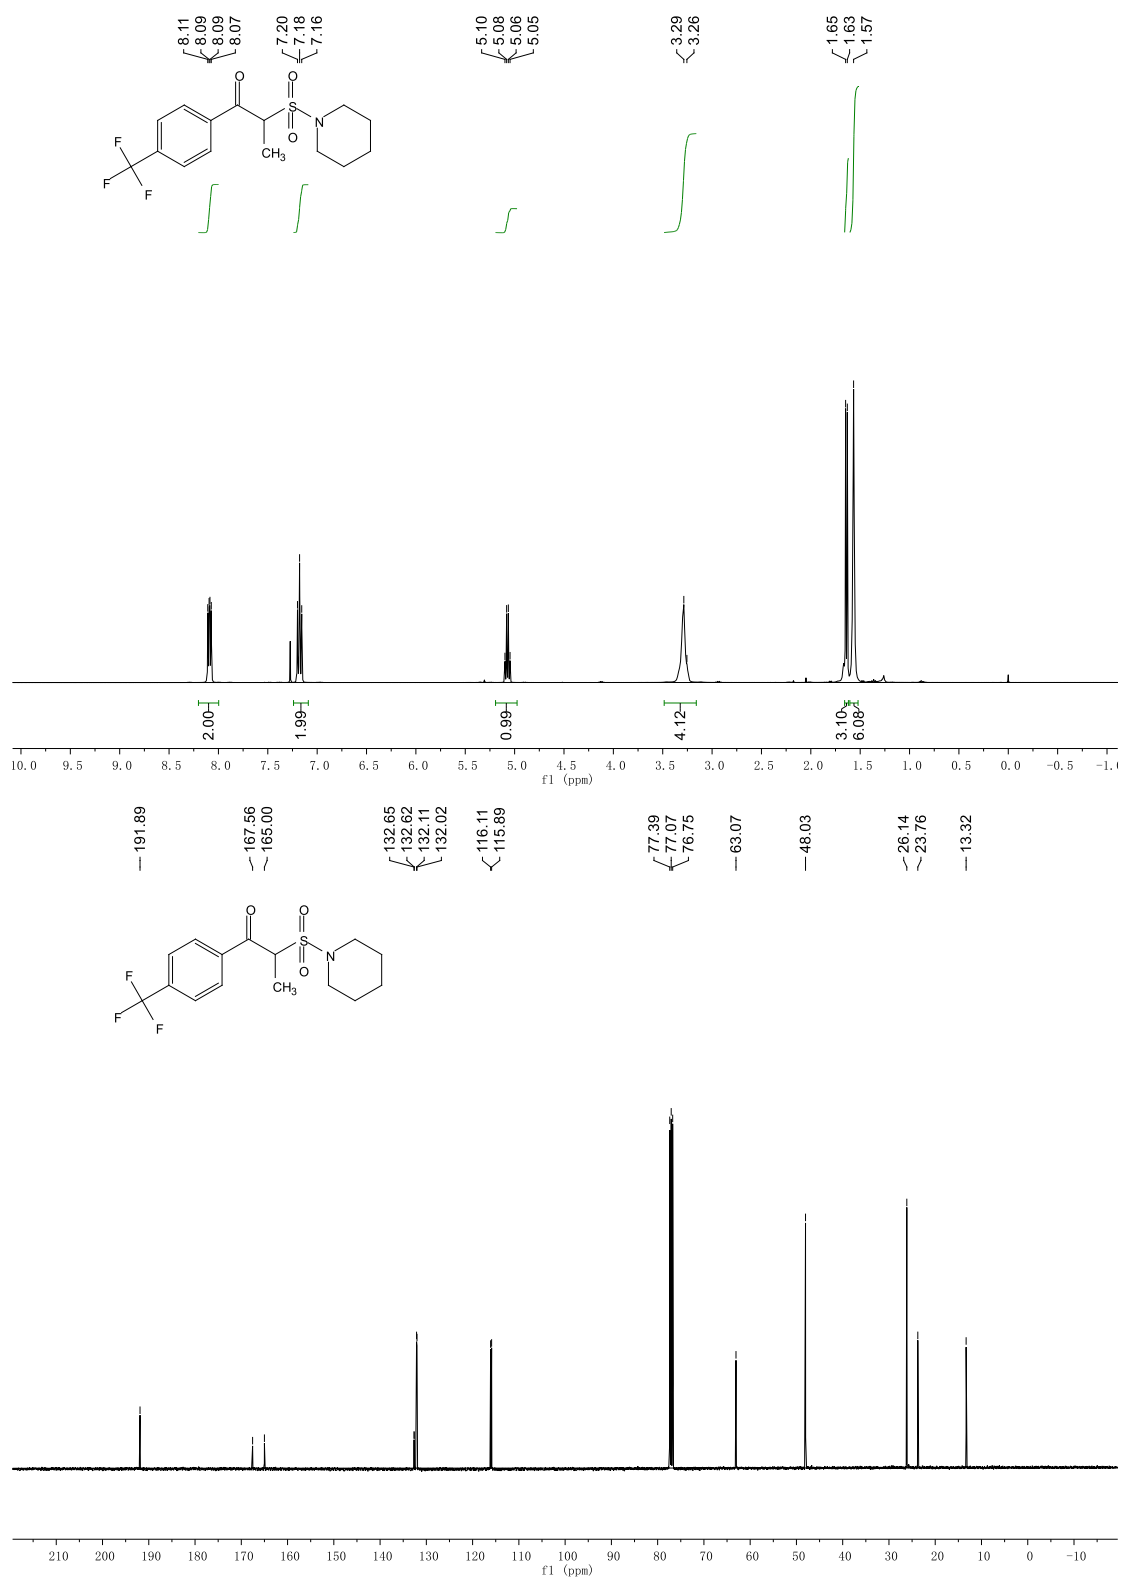

NMR spectra of **1g**

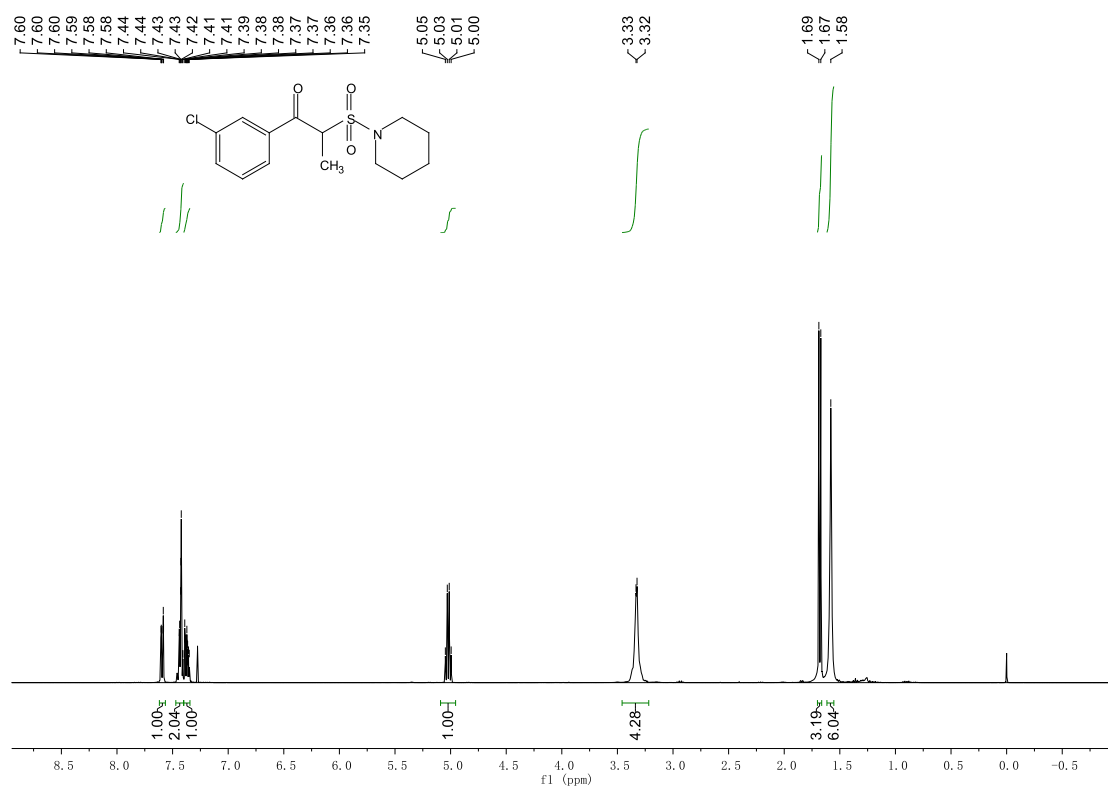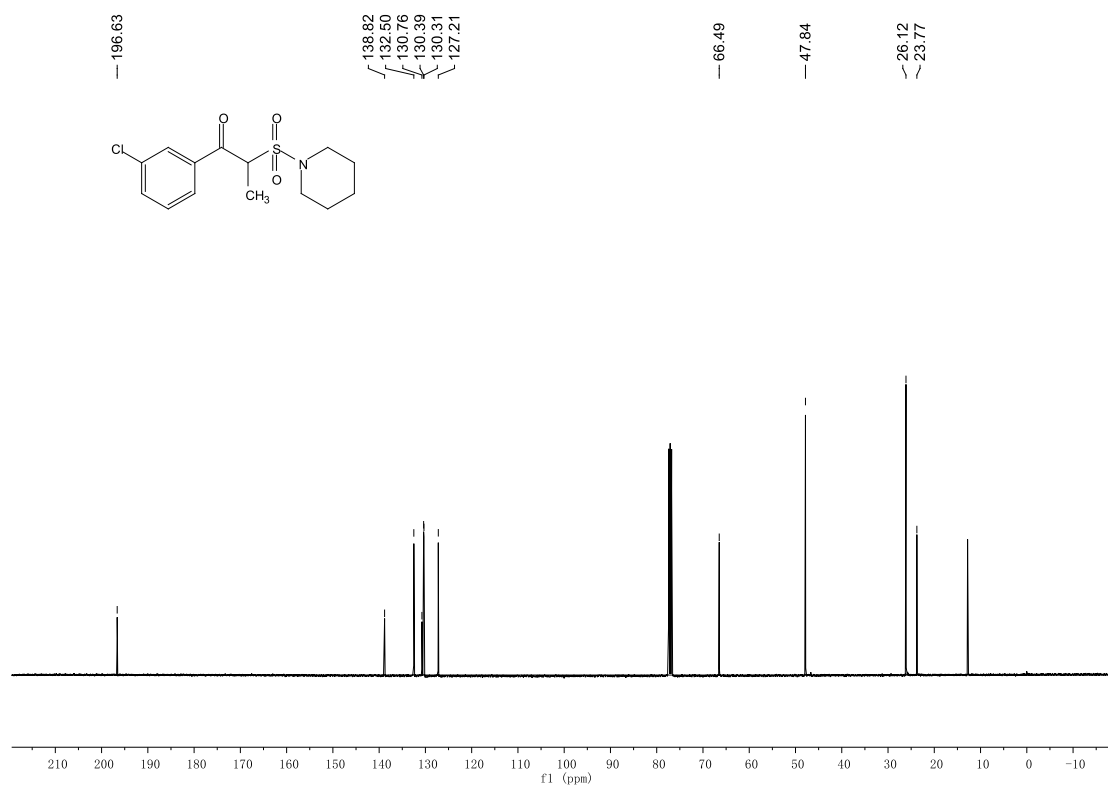

NMR spectra of **1h**

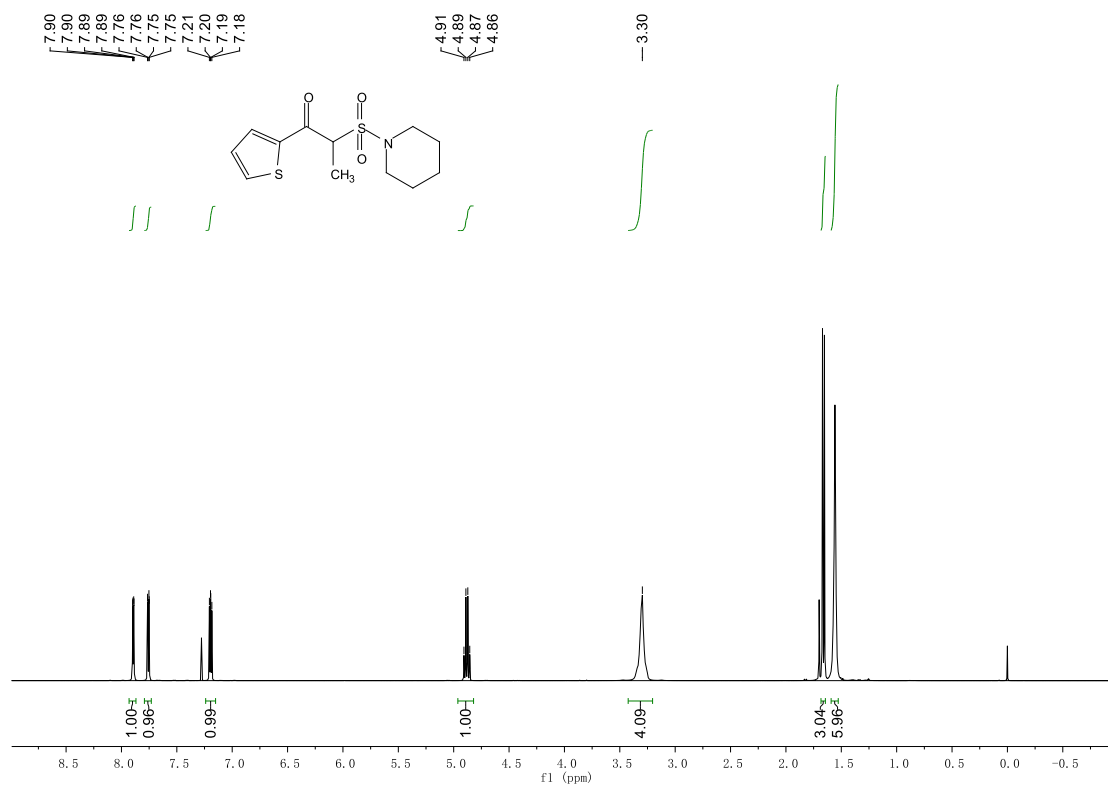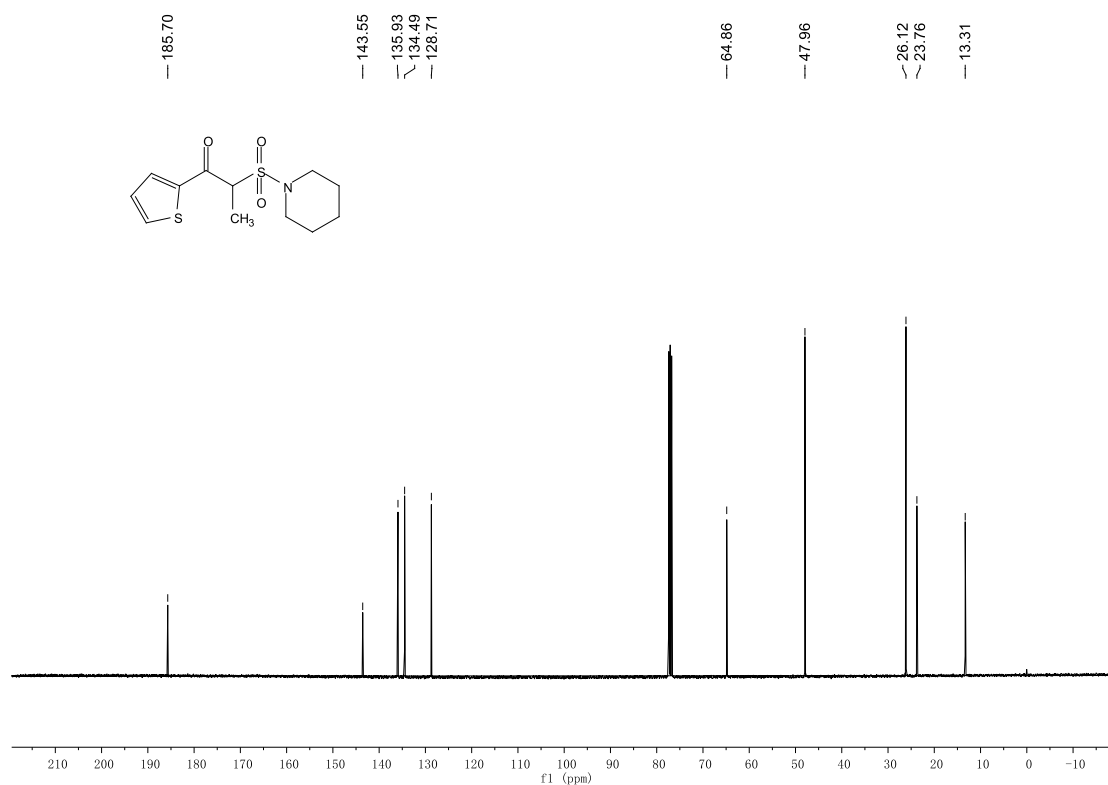

NMR spectra of **1i**

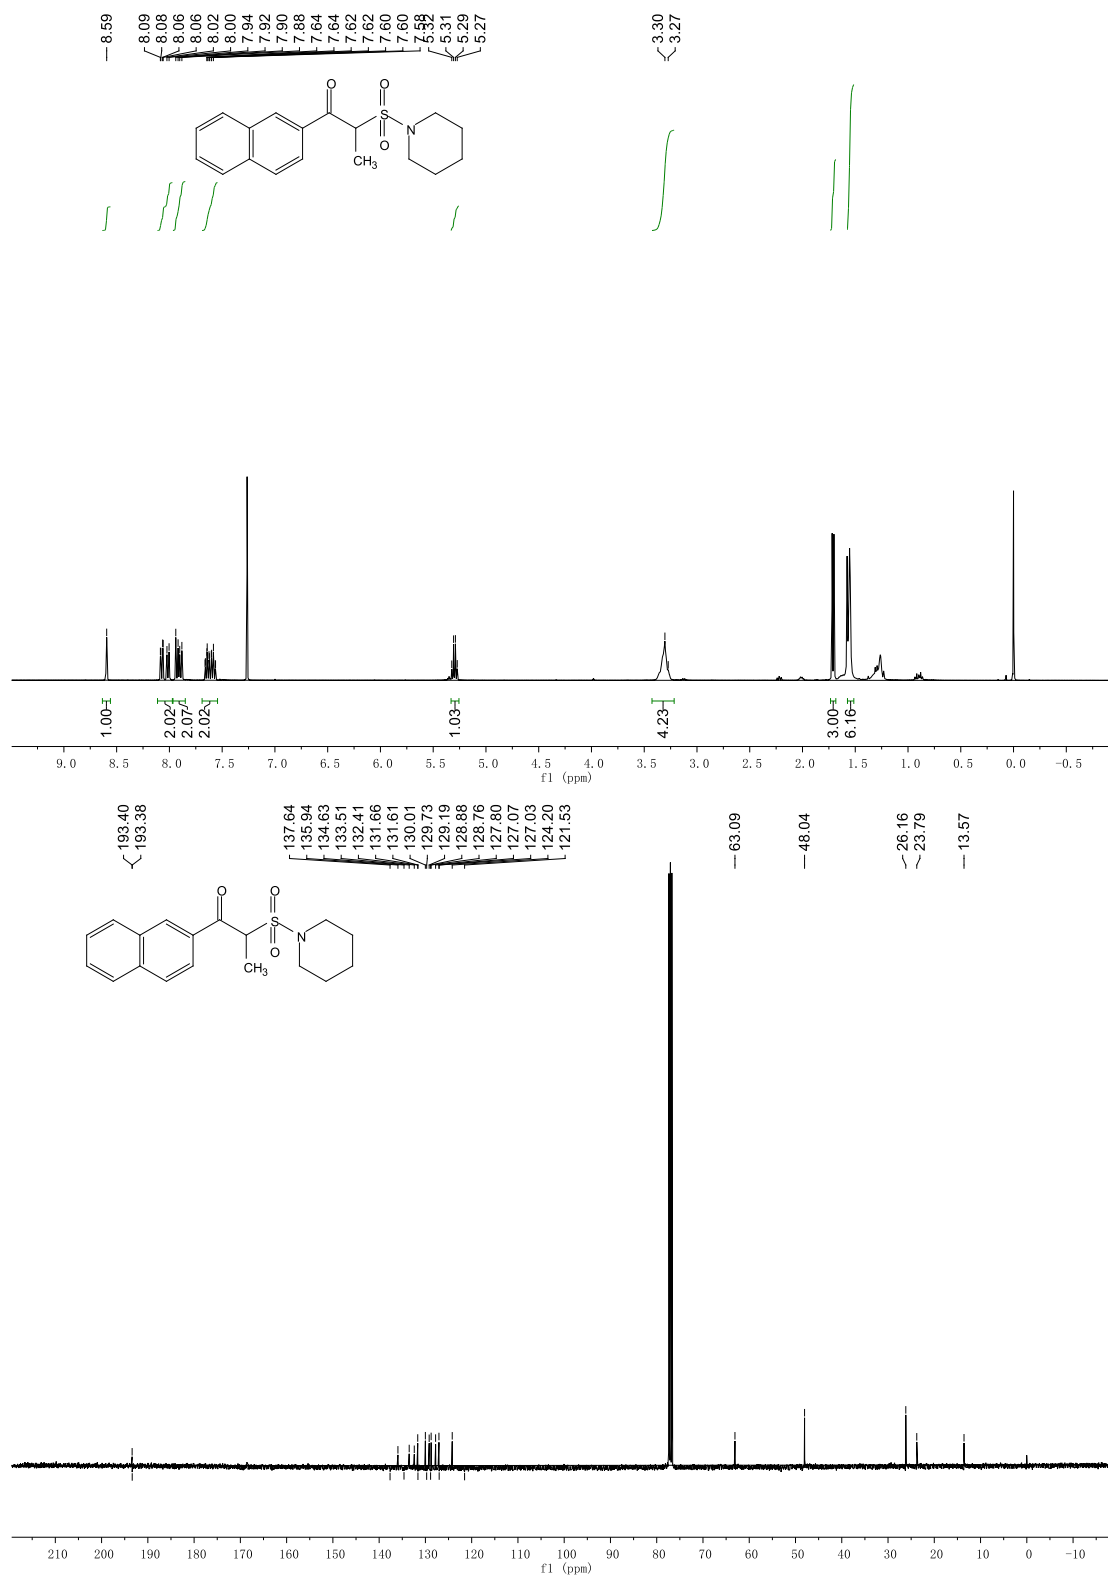

NMR spectra of **1j**

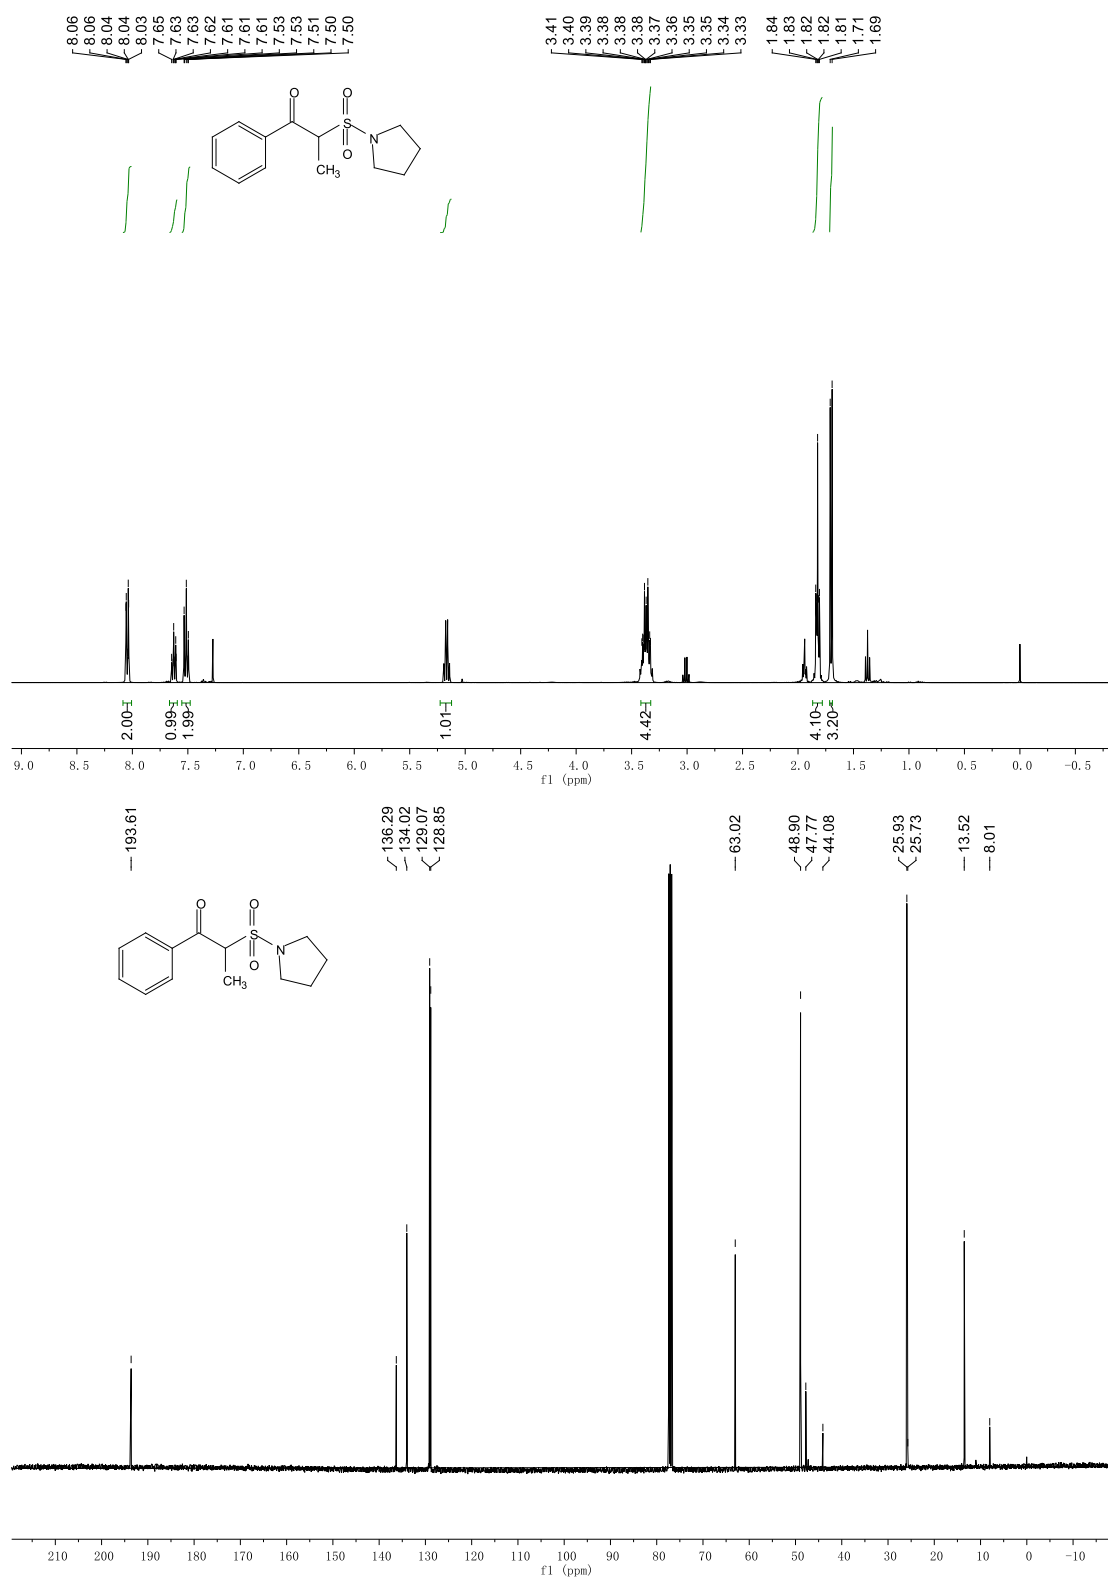

NMR spectra of 1k

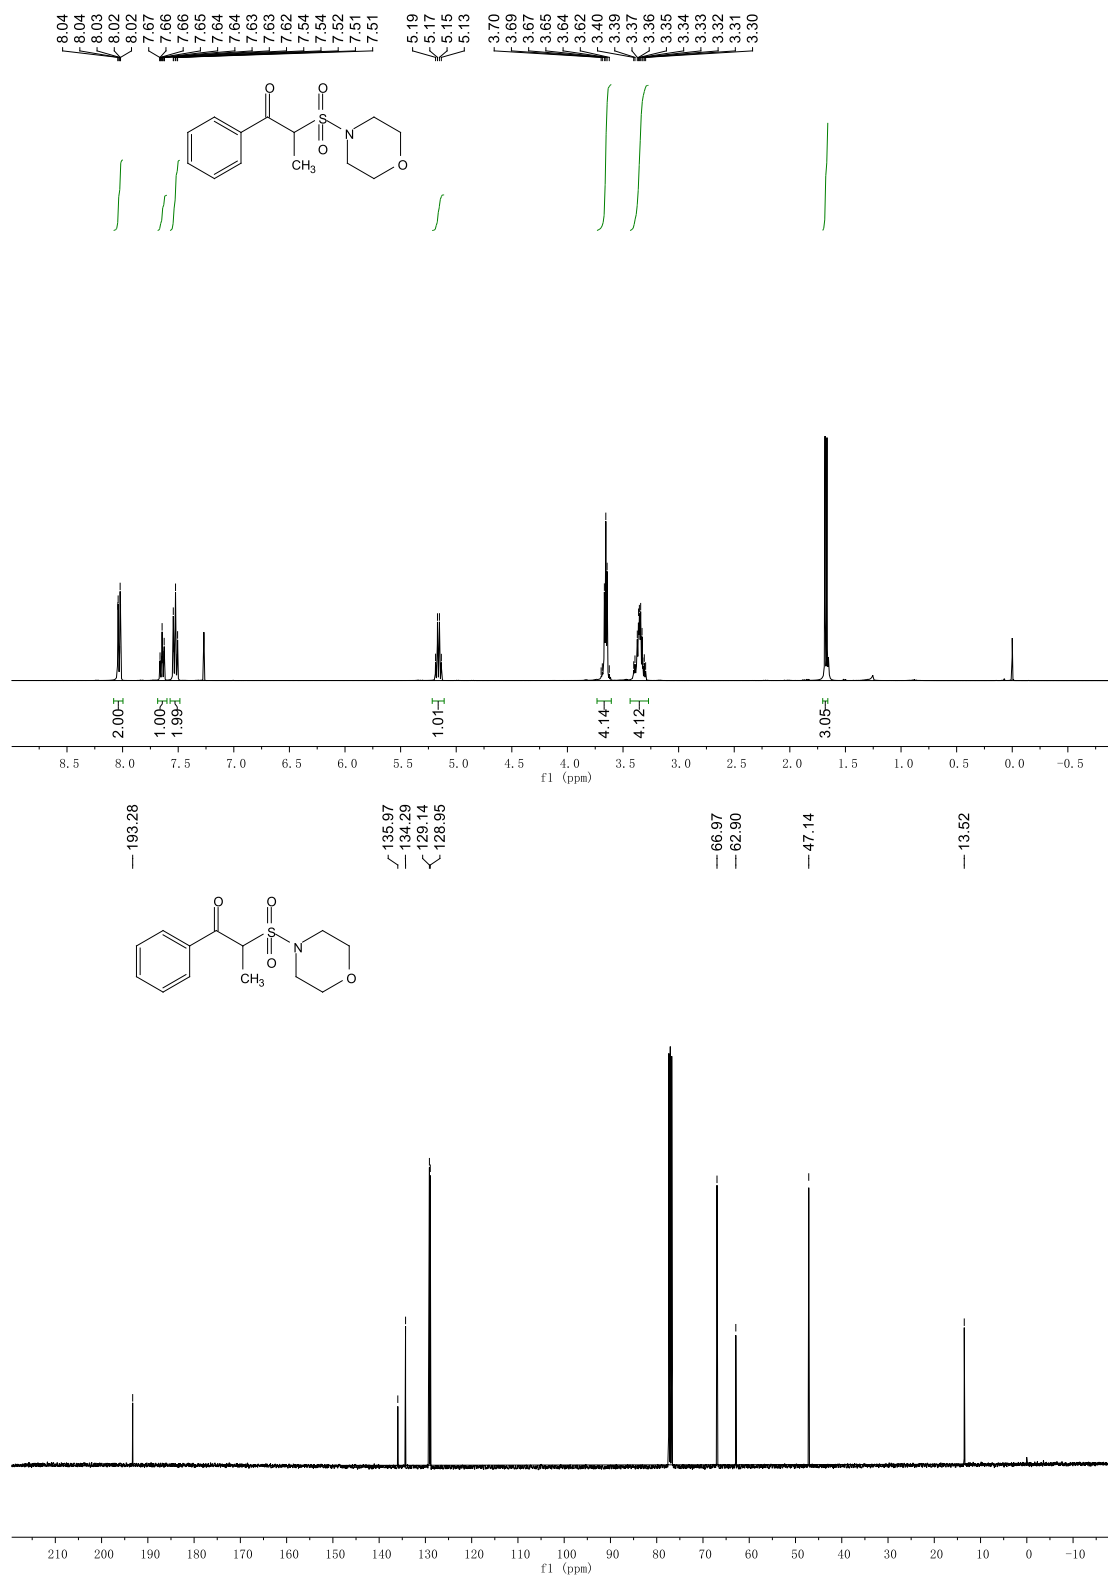

NMR spectra of **11**

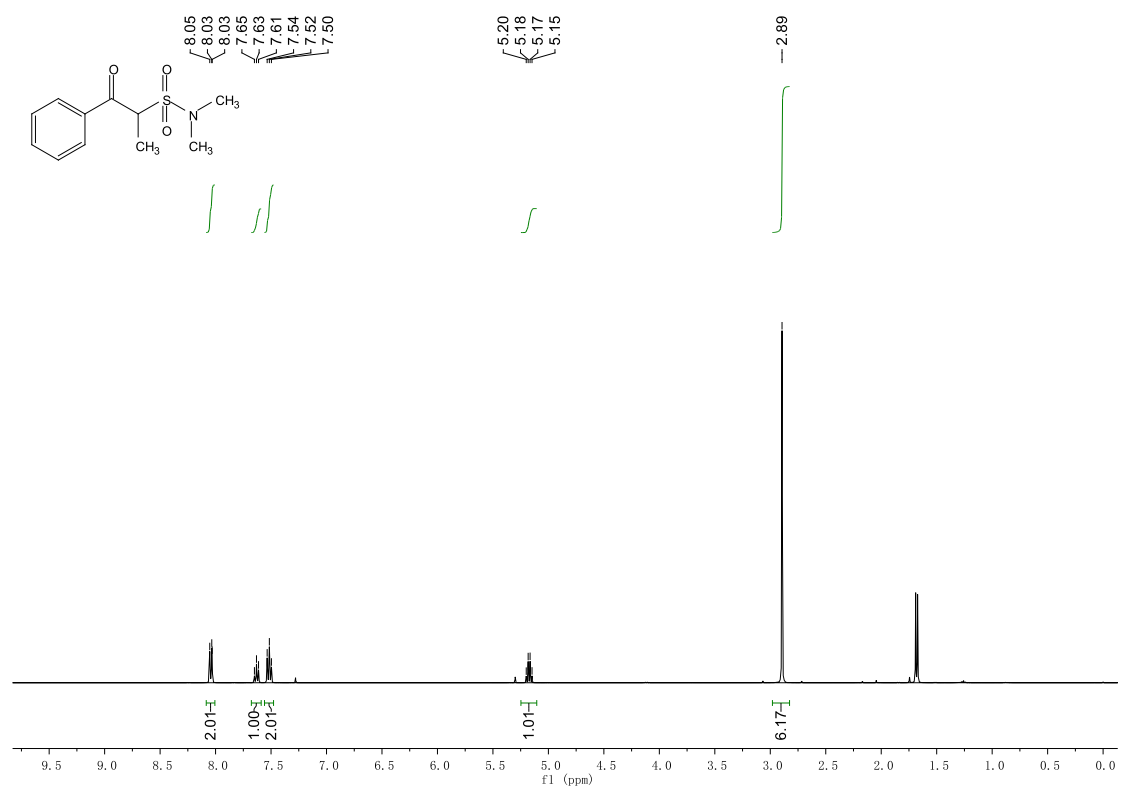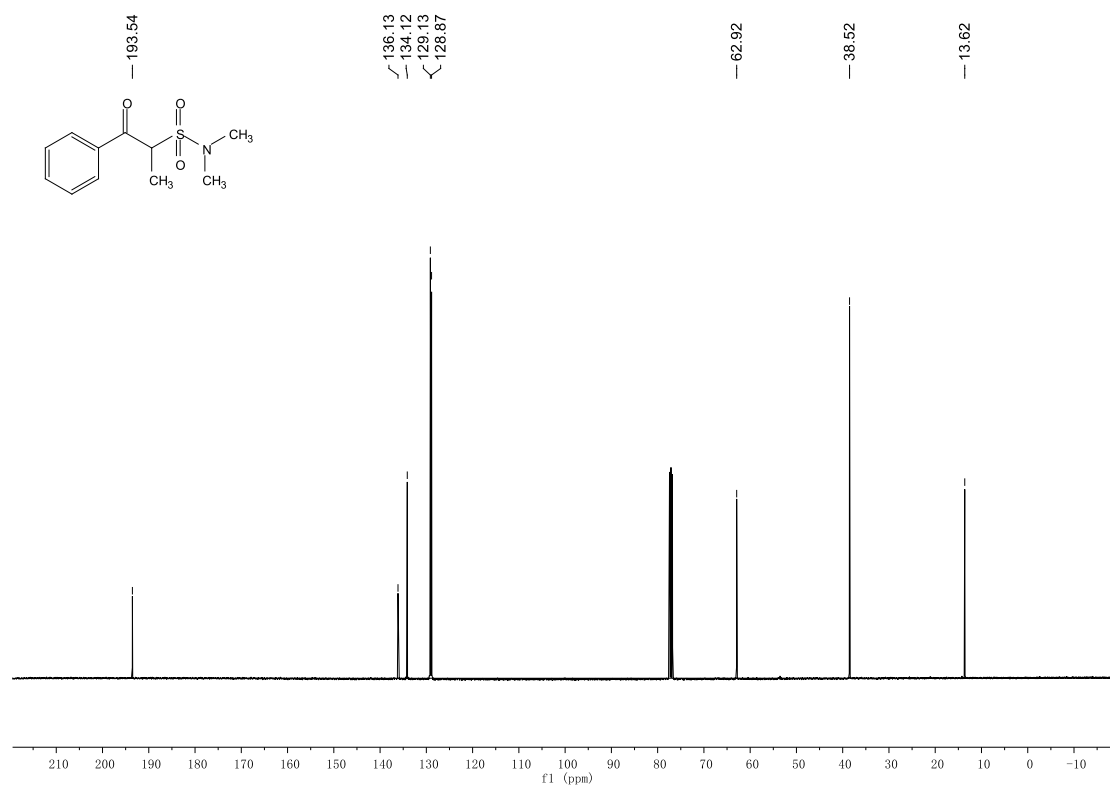

NMR spectra of **1m**

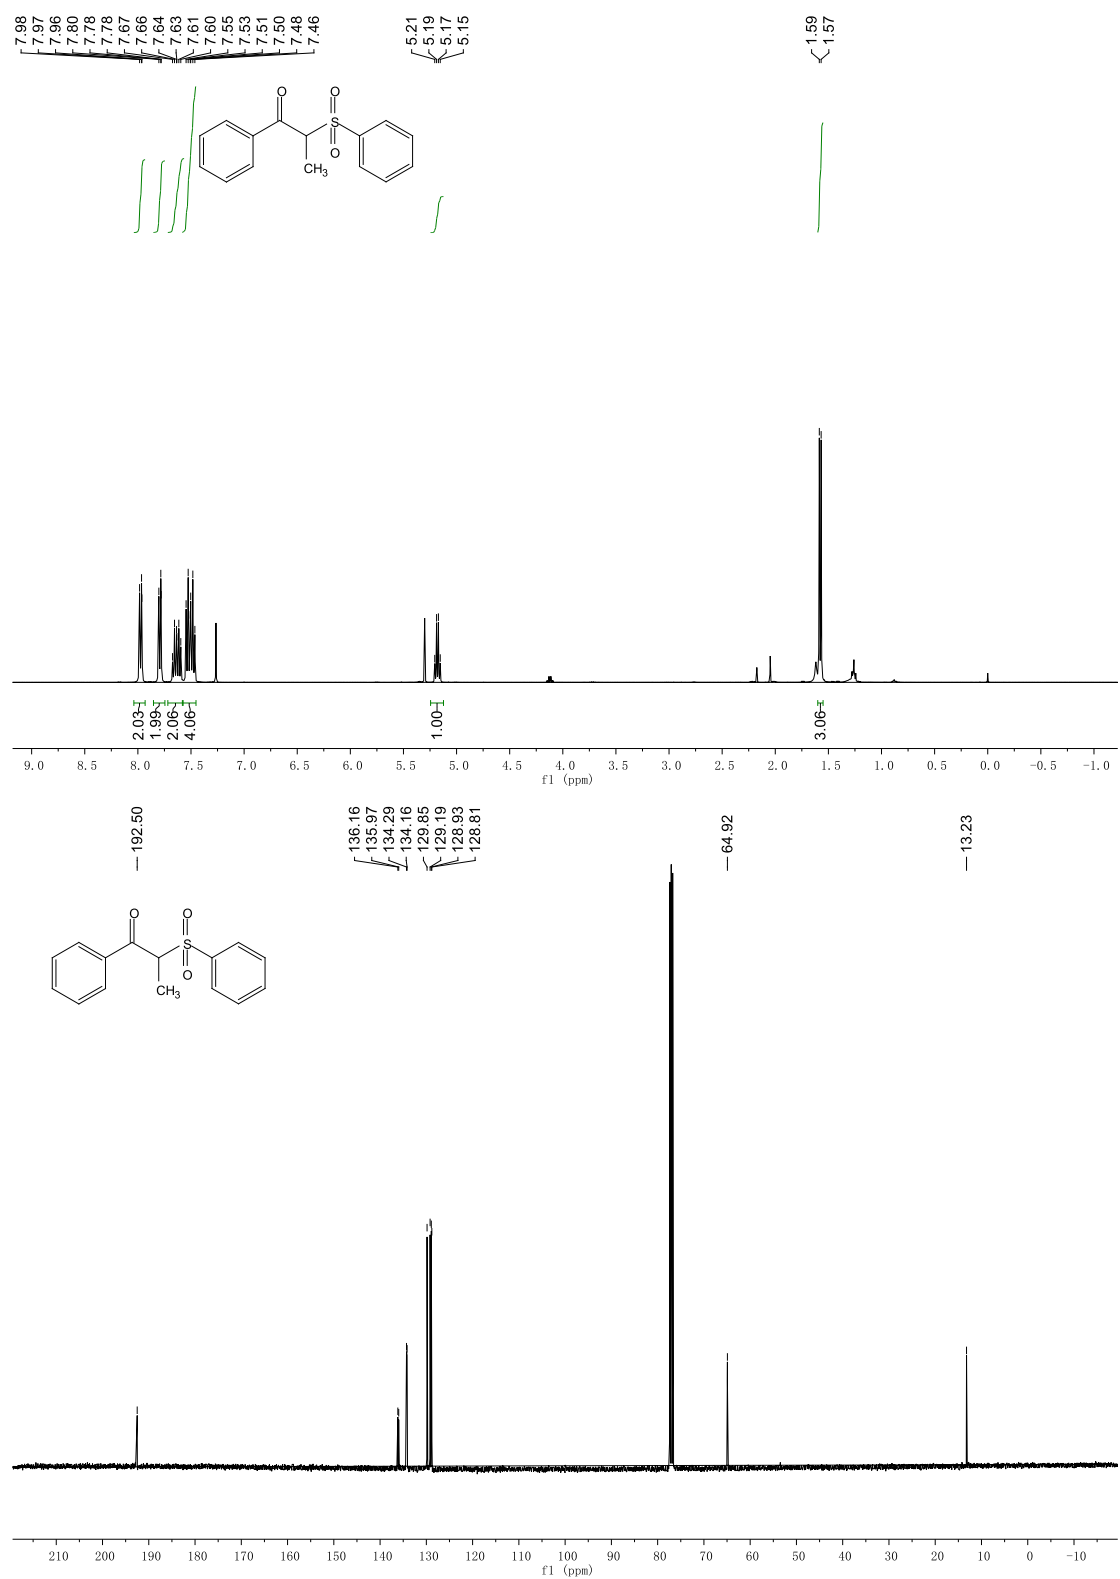

NMR spectra of **1n**



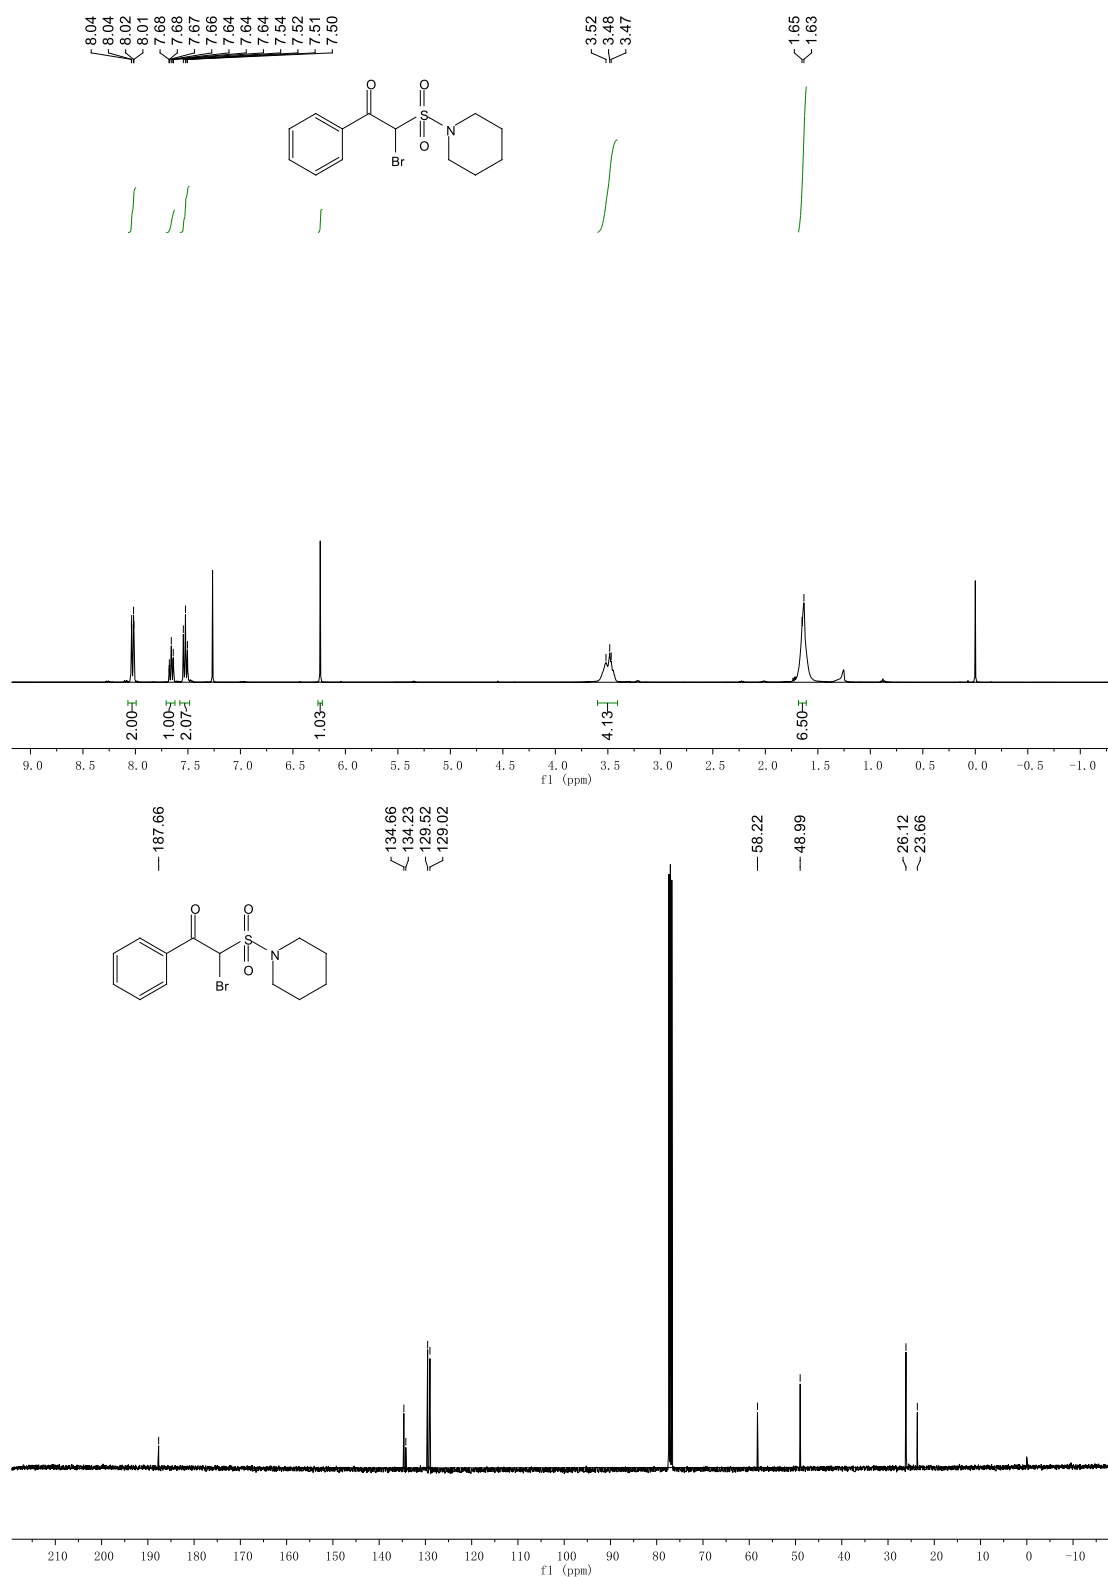

NMR spectra of **10**

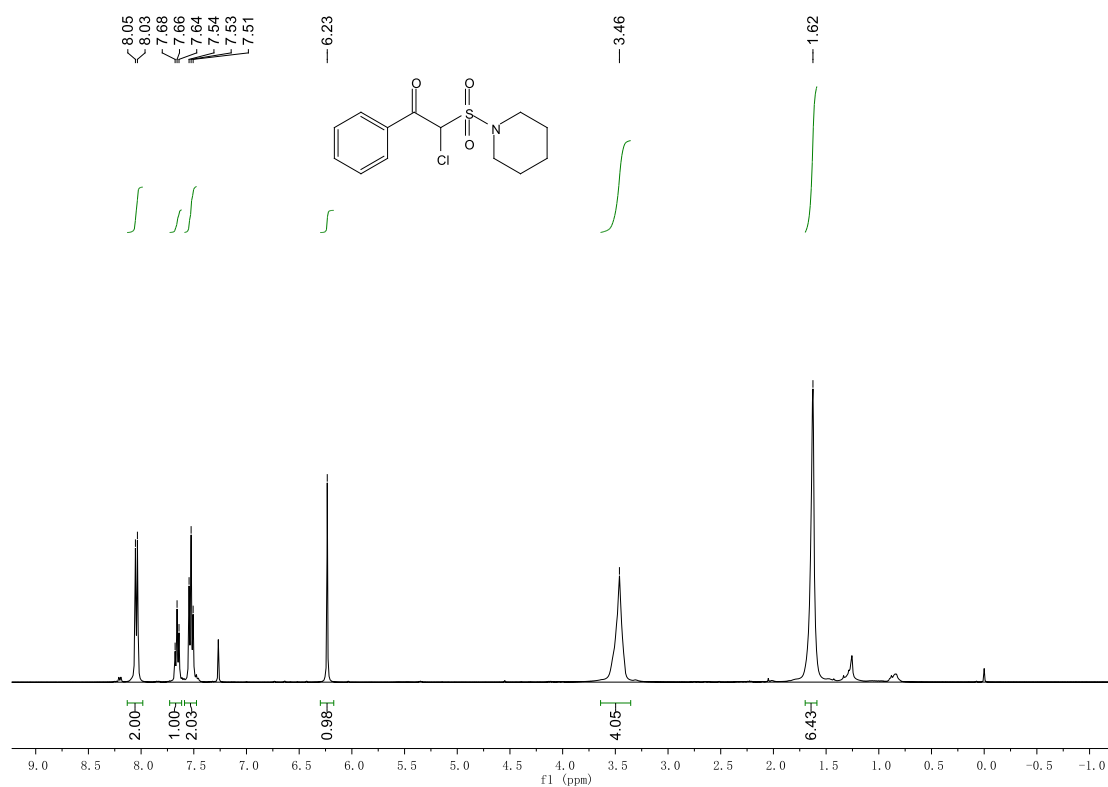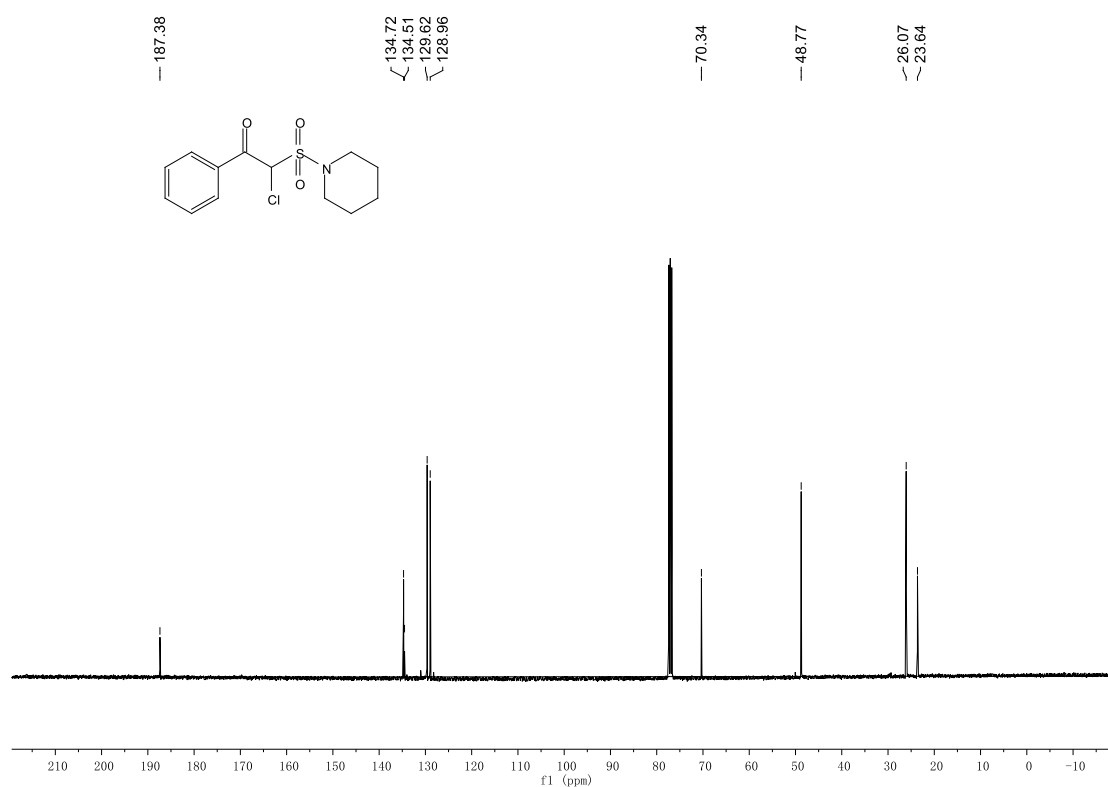

NMR spectra of **2a**

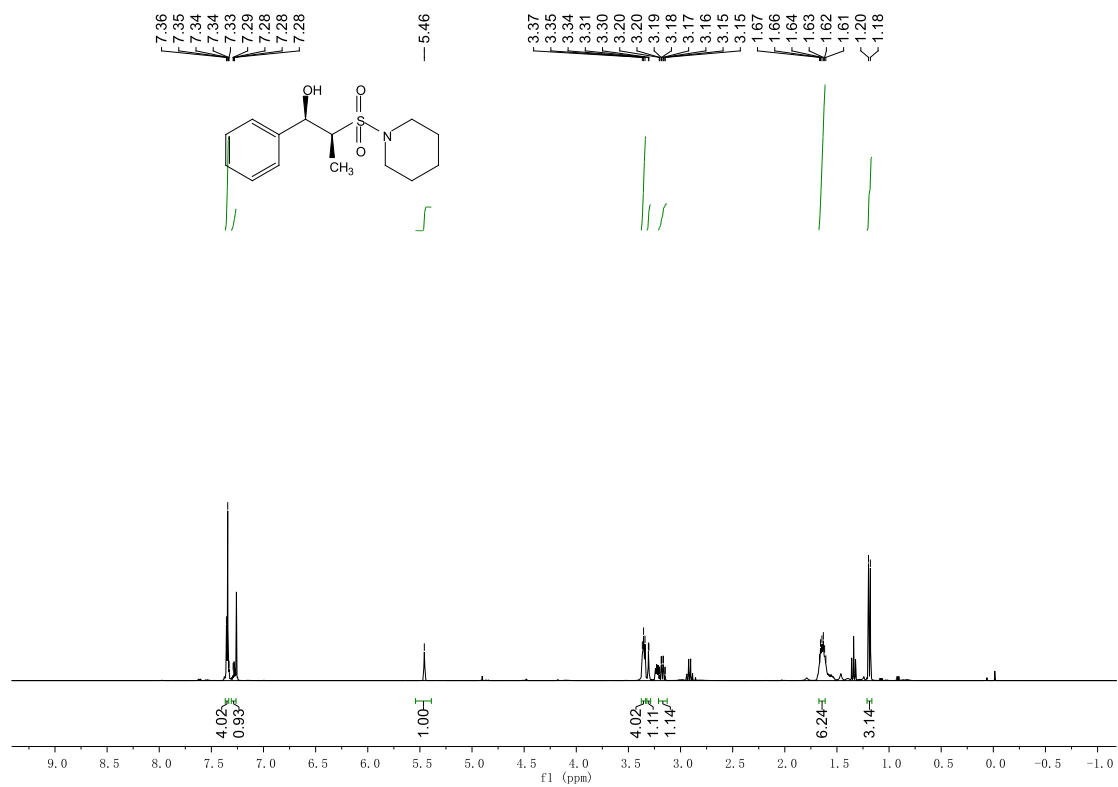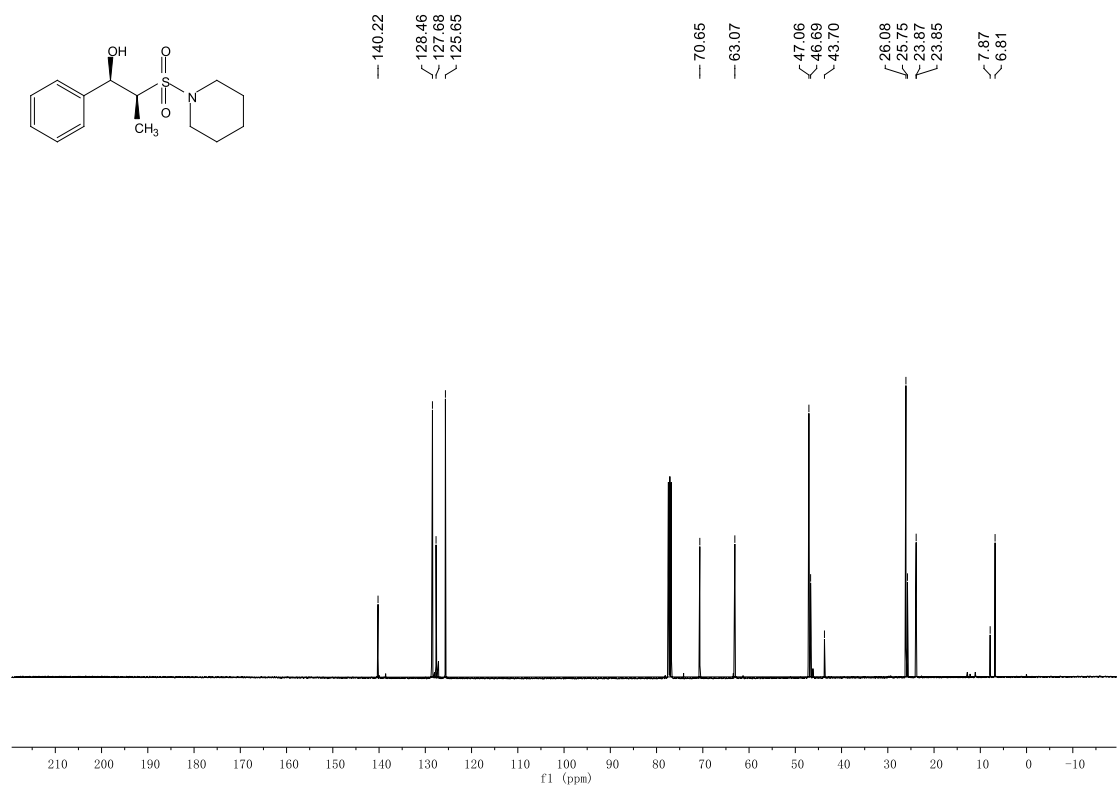

NMR spectra of **2b**

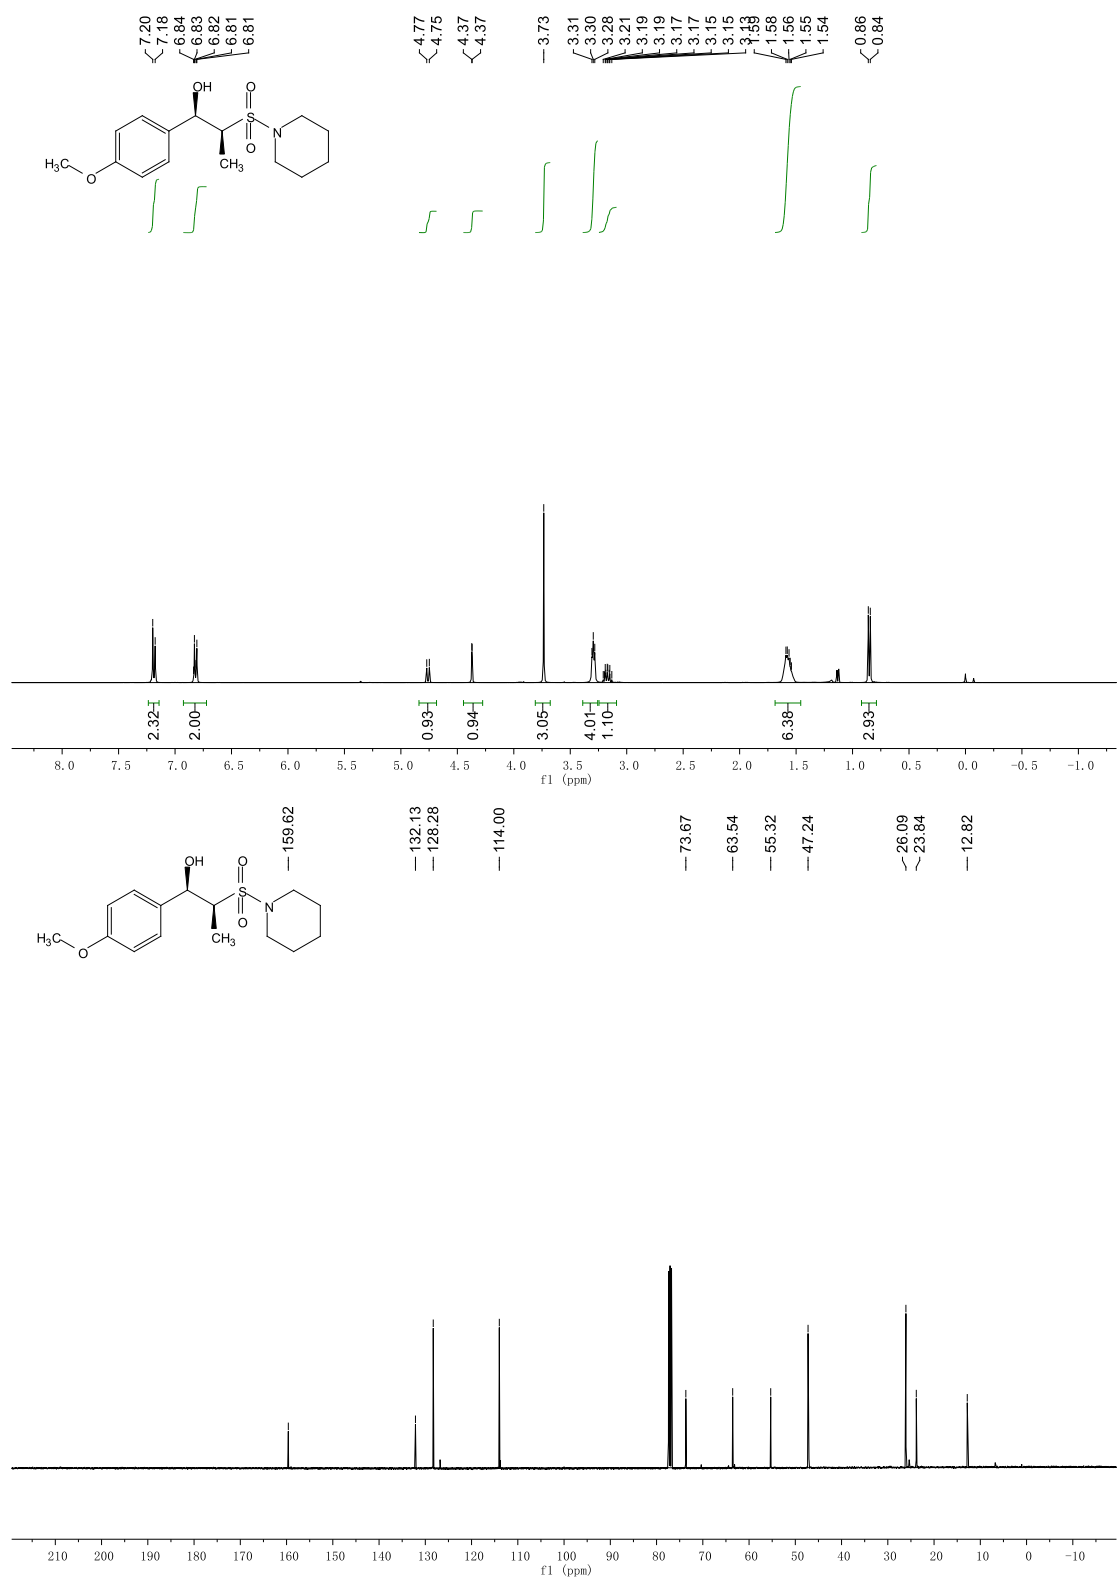

NMR spectra of **2c**

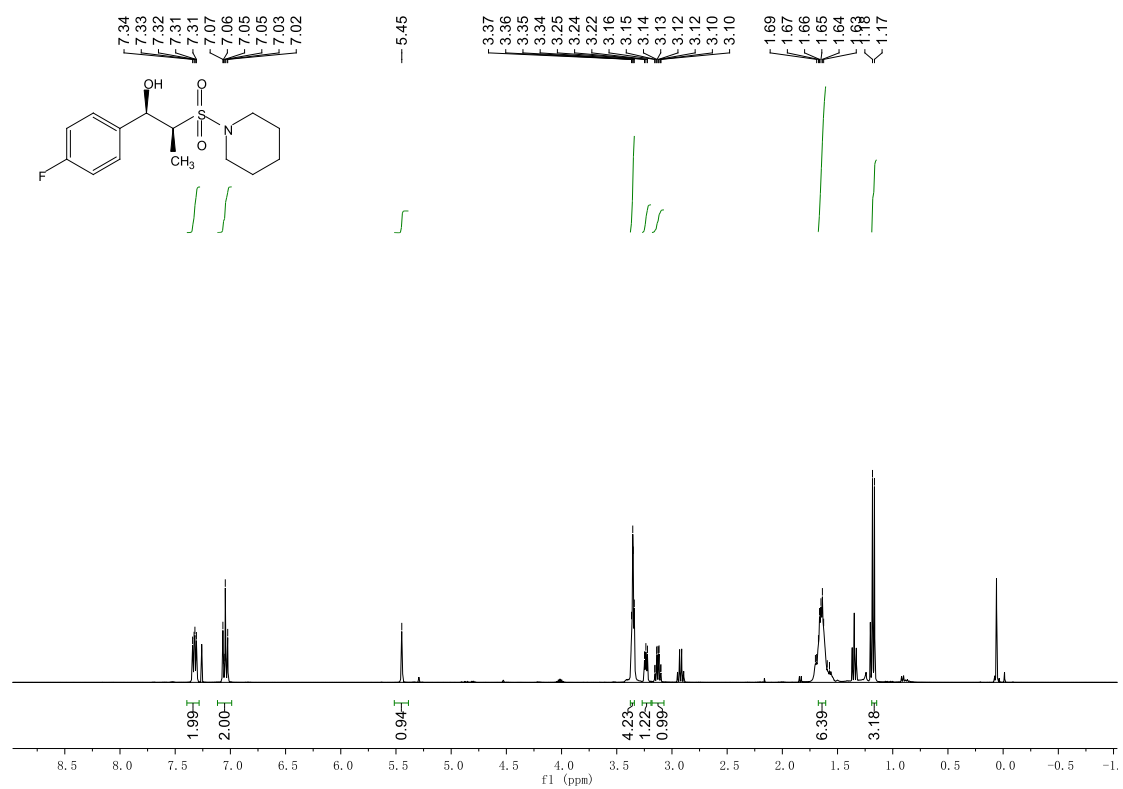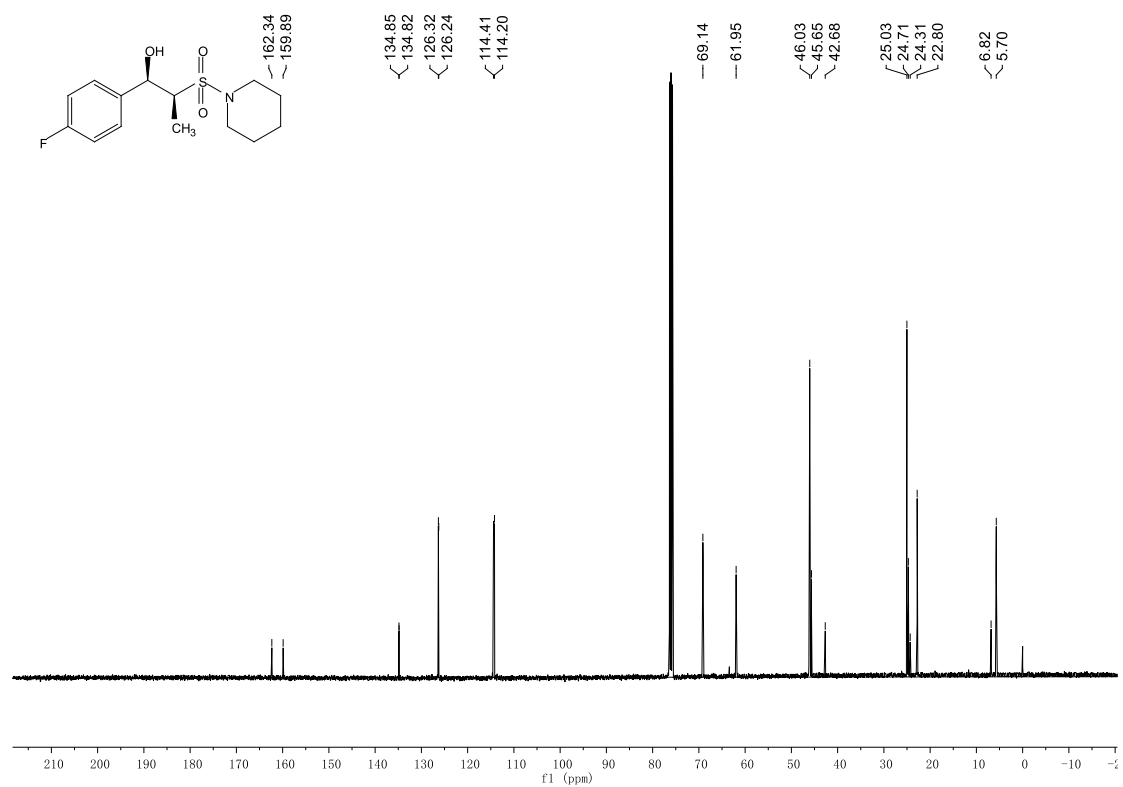

NMR spectra of **2d**

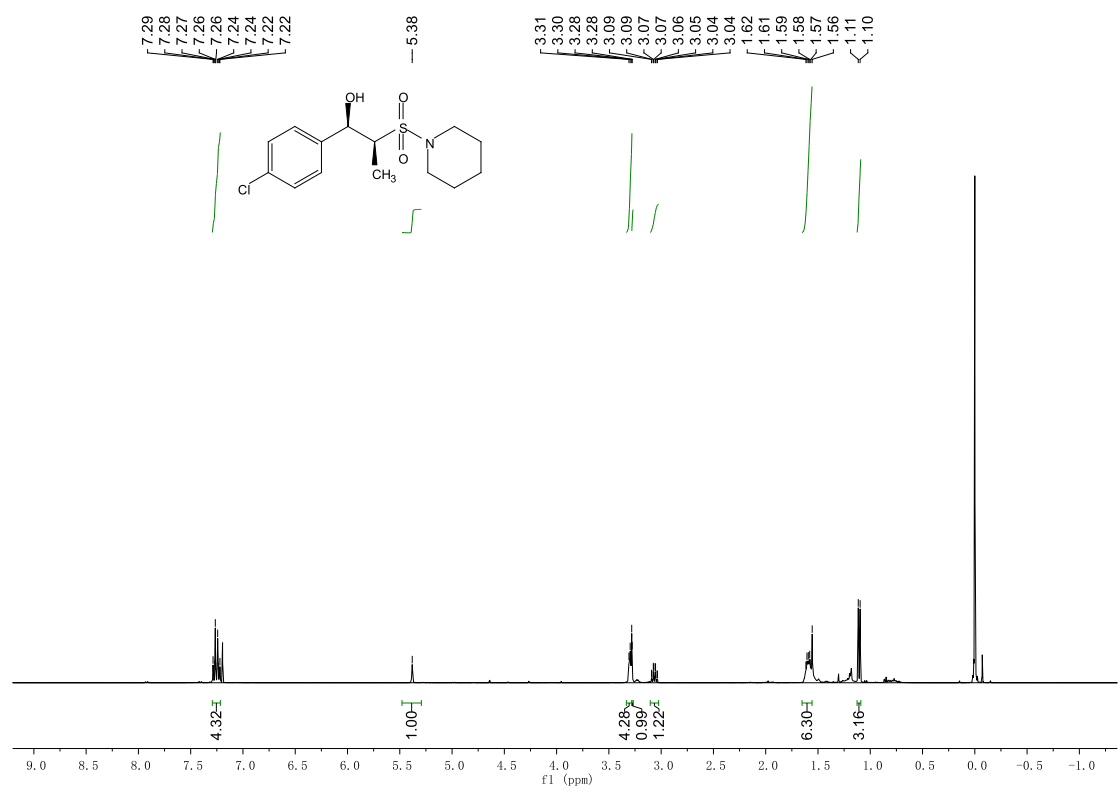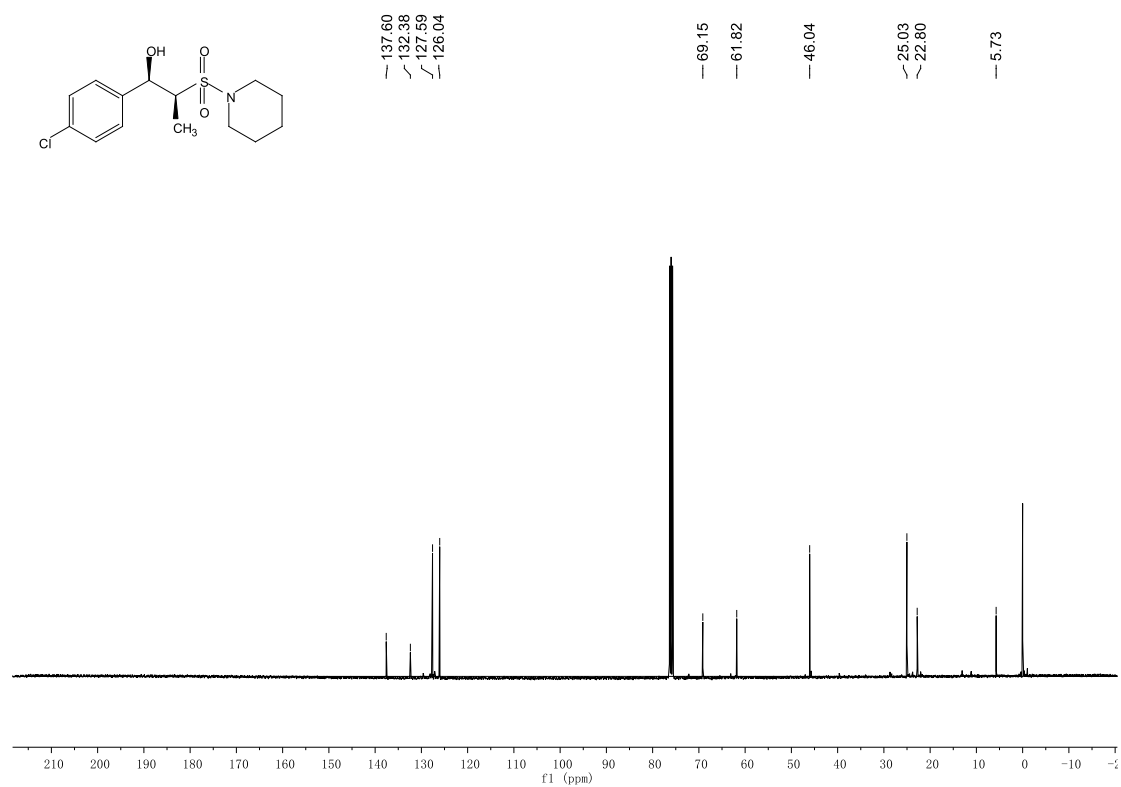

NMR spectra of **2e**

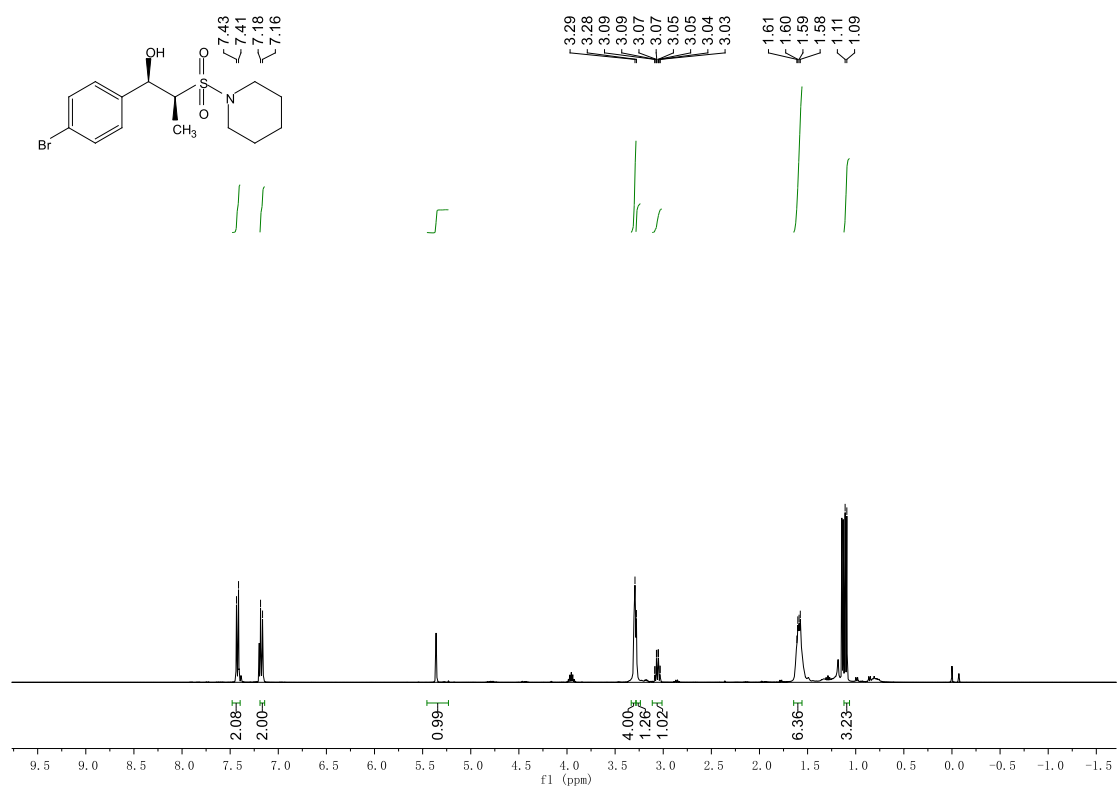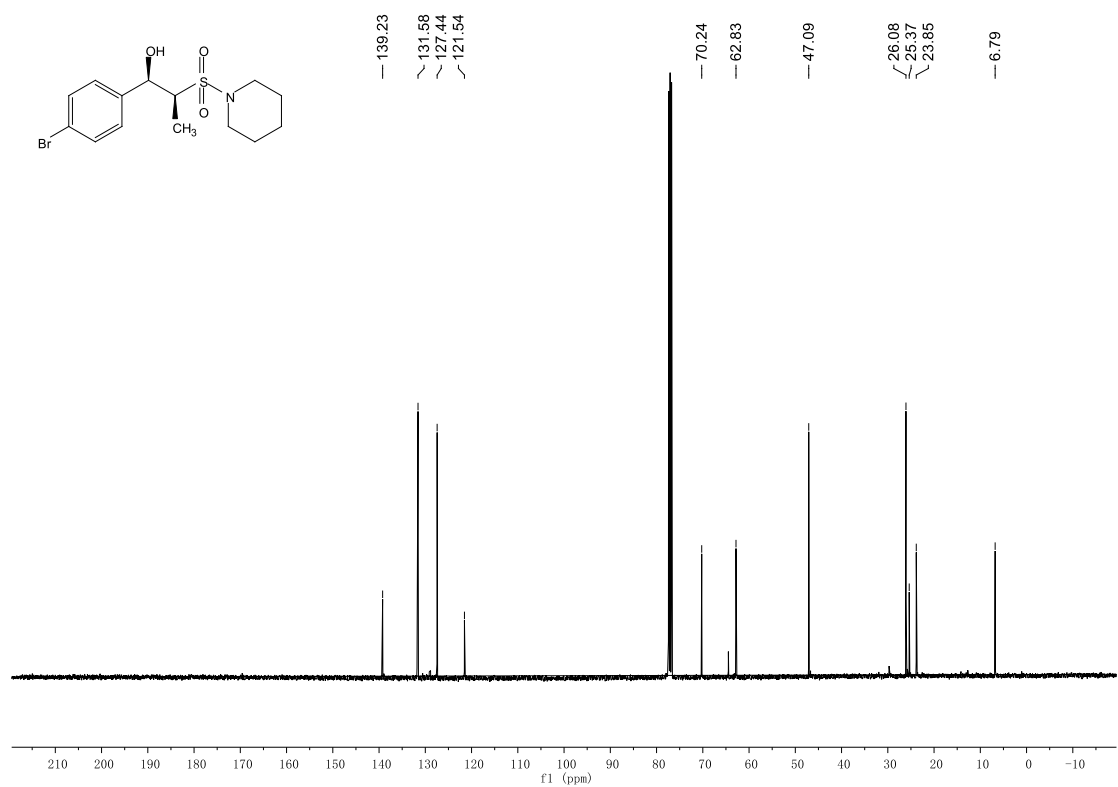

NMR spectra of **2f**

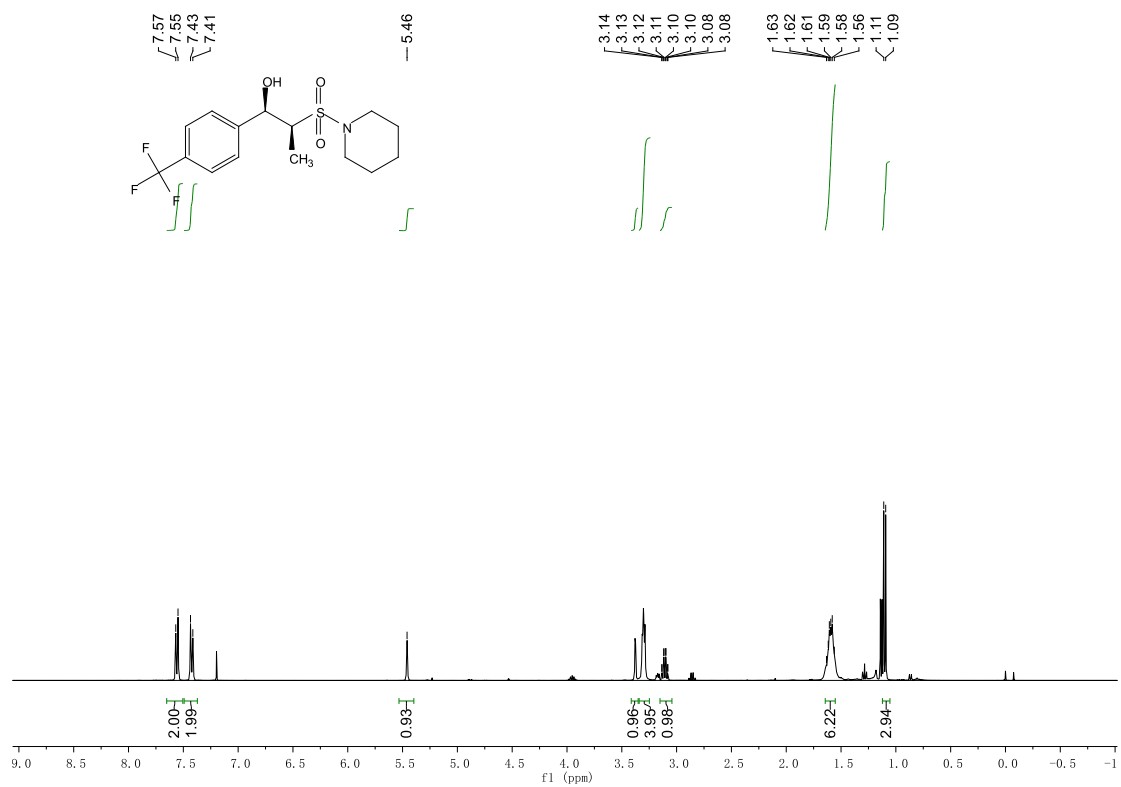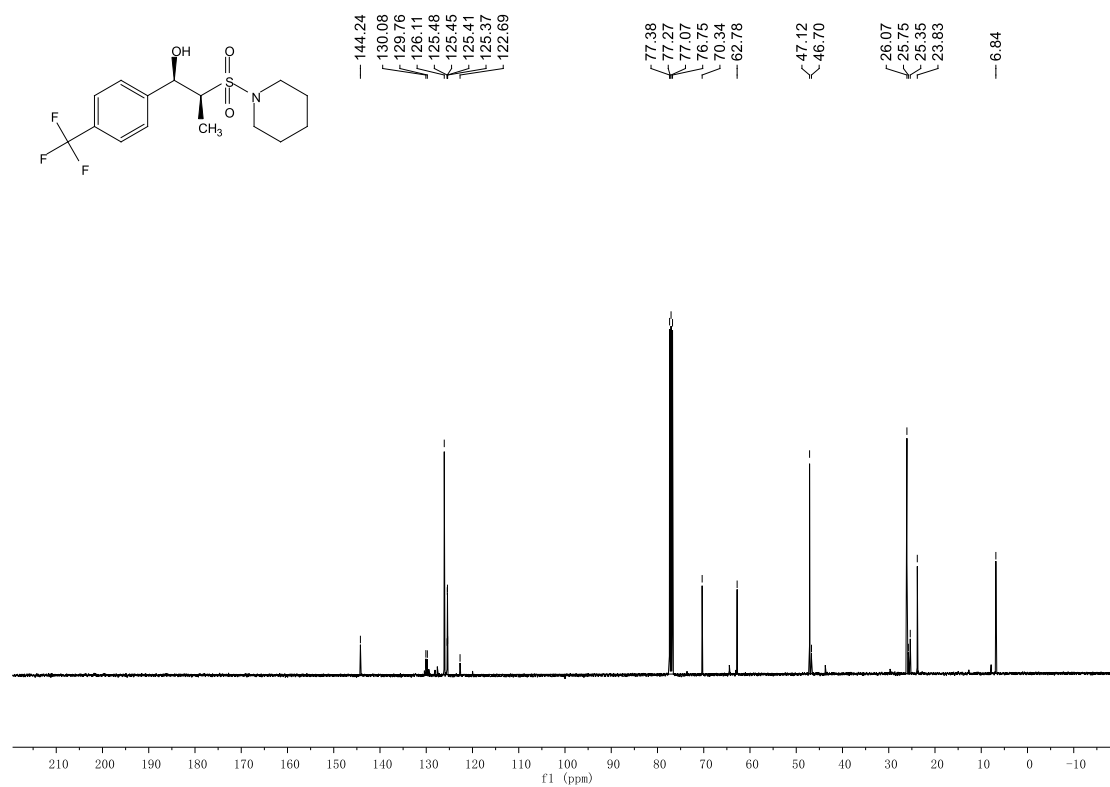

NMR spectra of **2g**



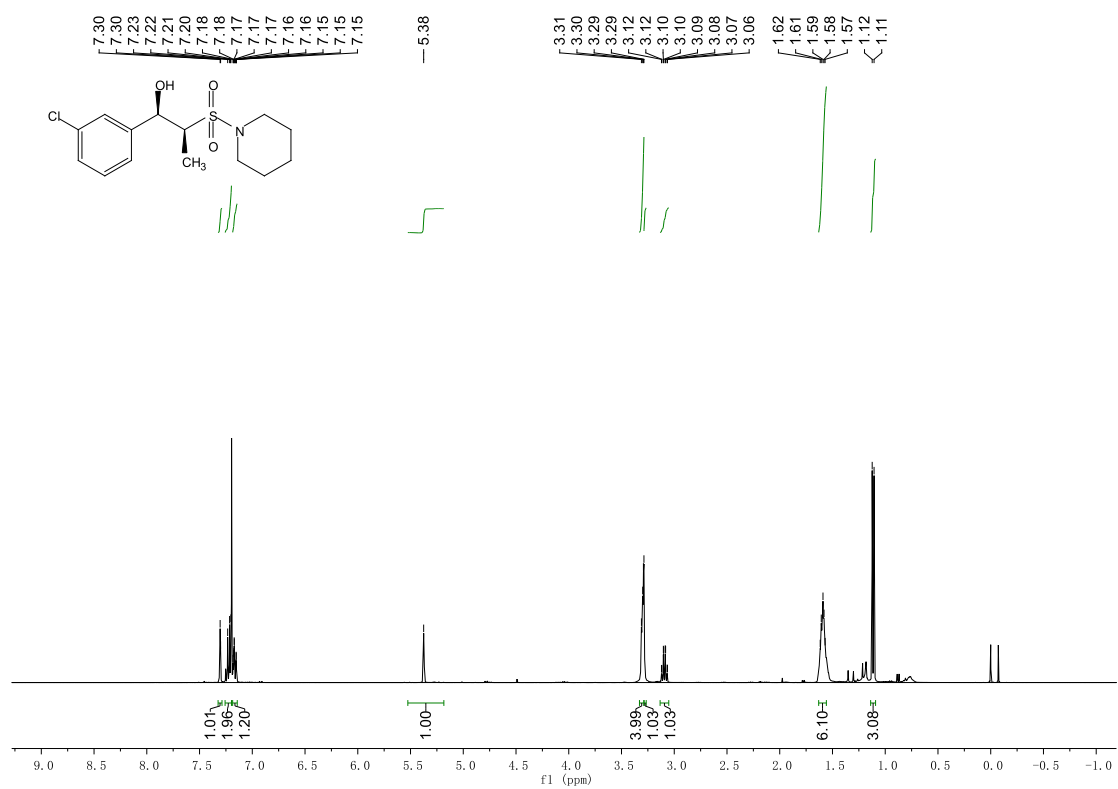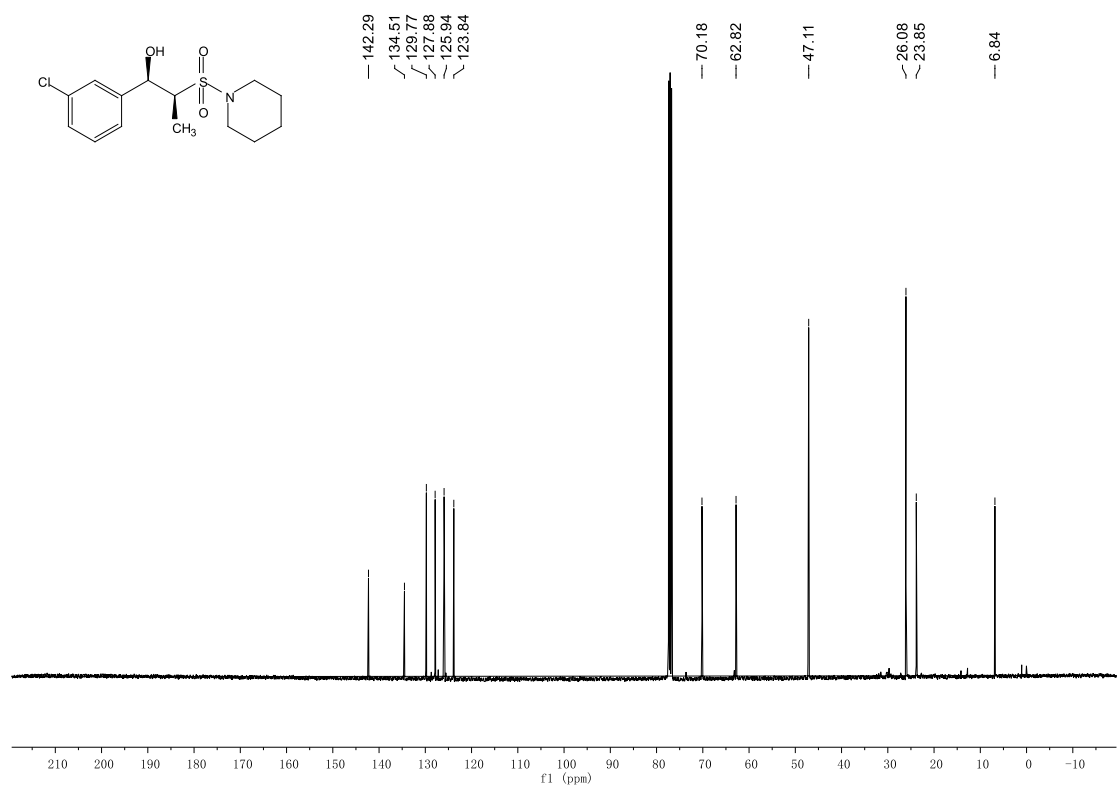

NMR spectra of **2h**

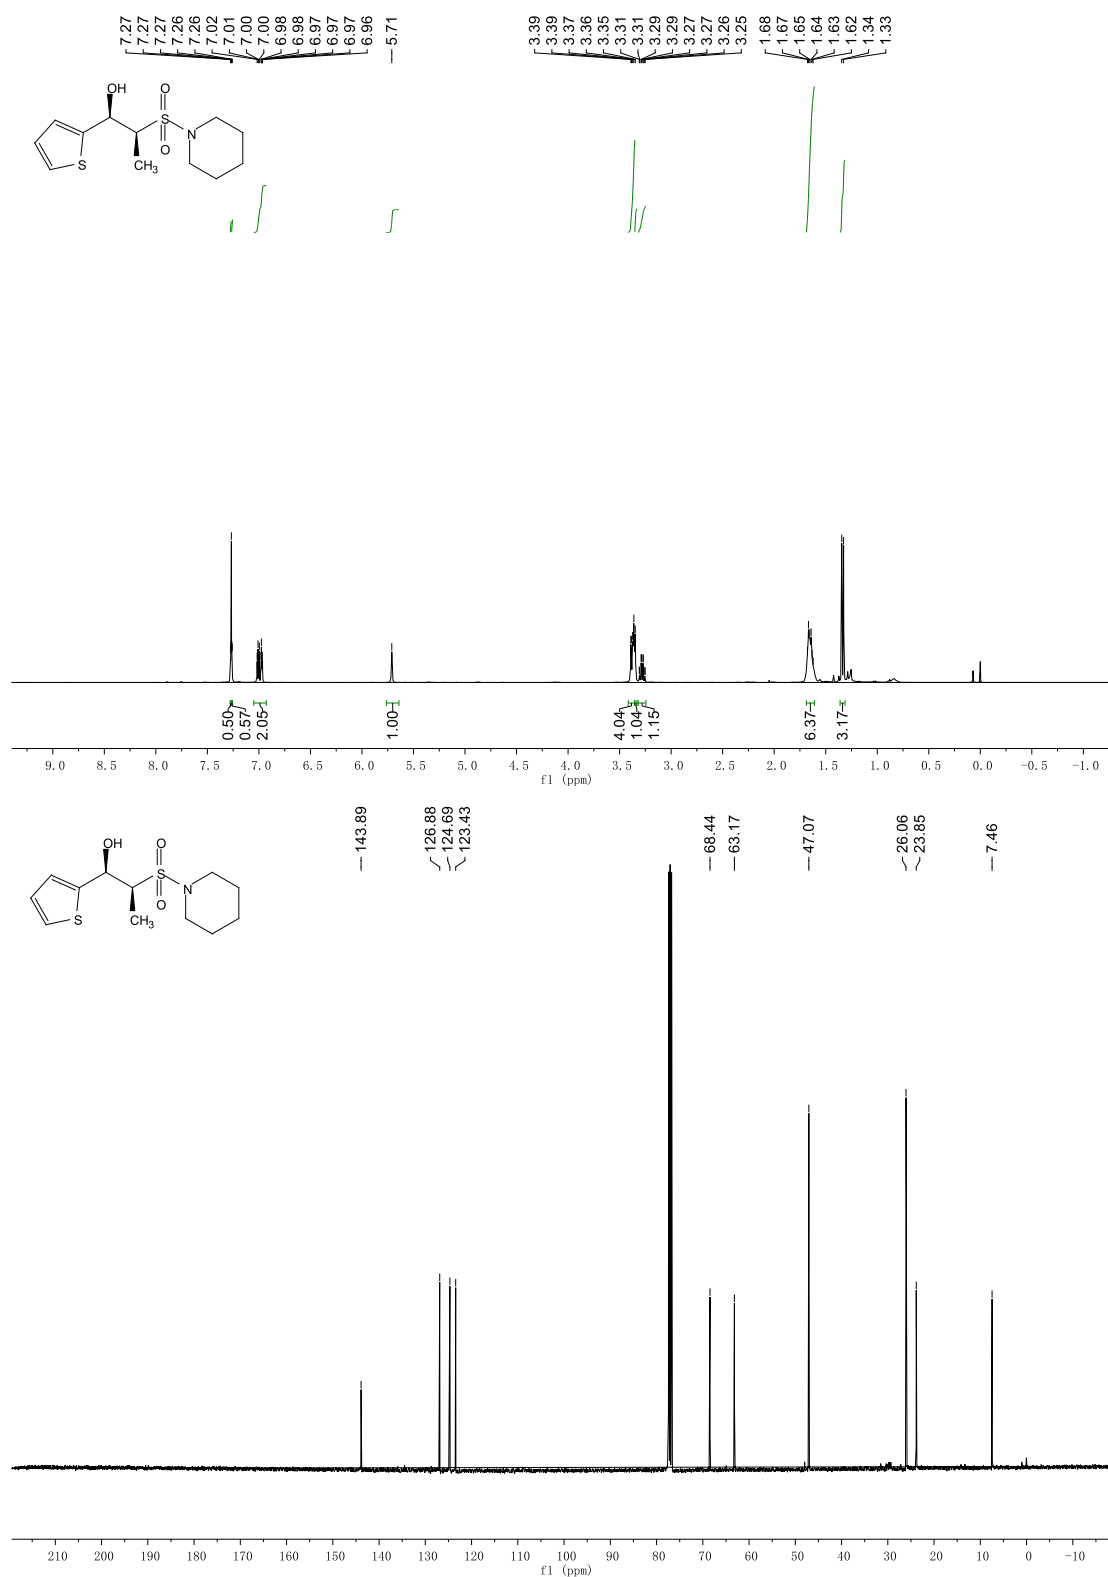

NMR spectra of **2i**

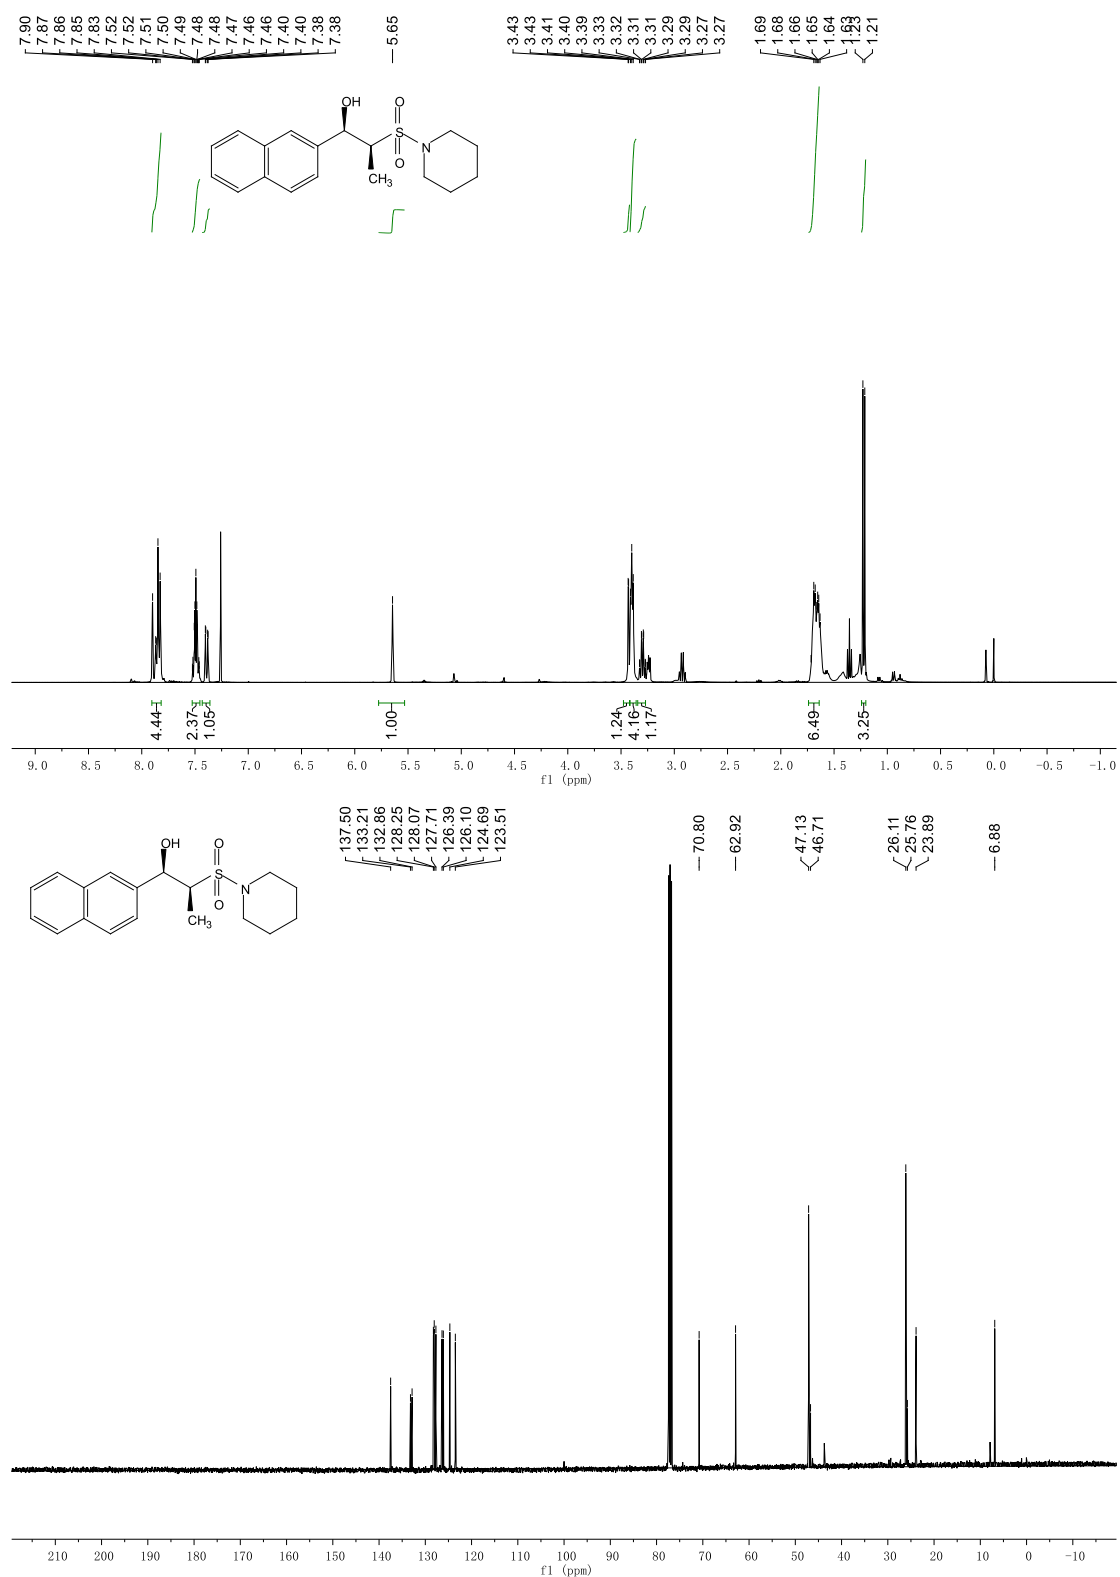

NMR spectra of **2j**

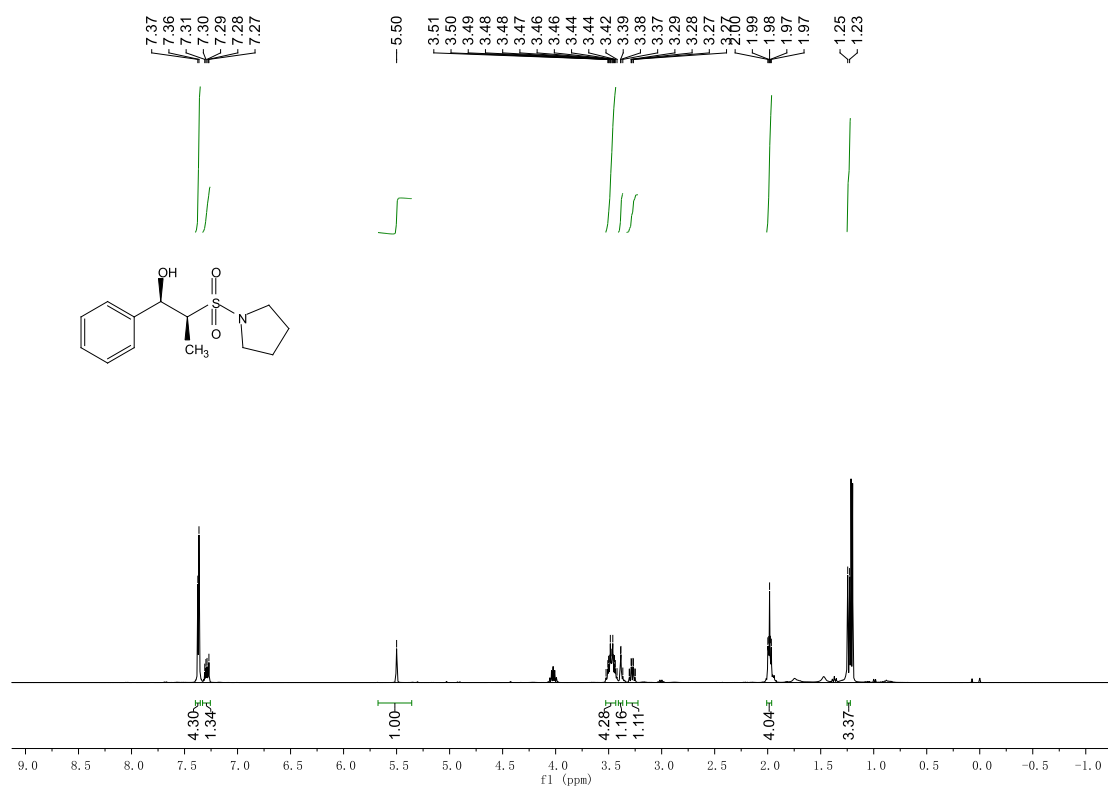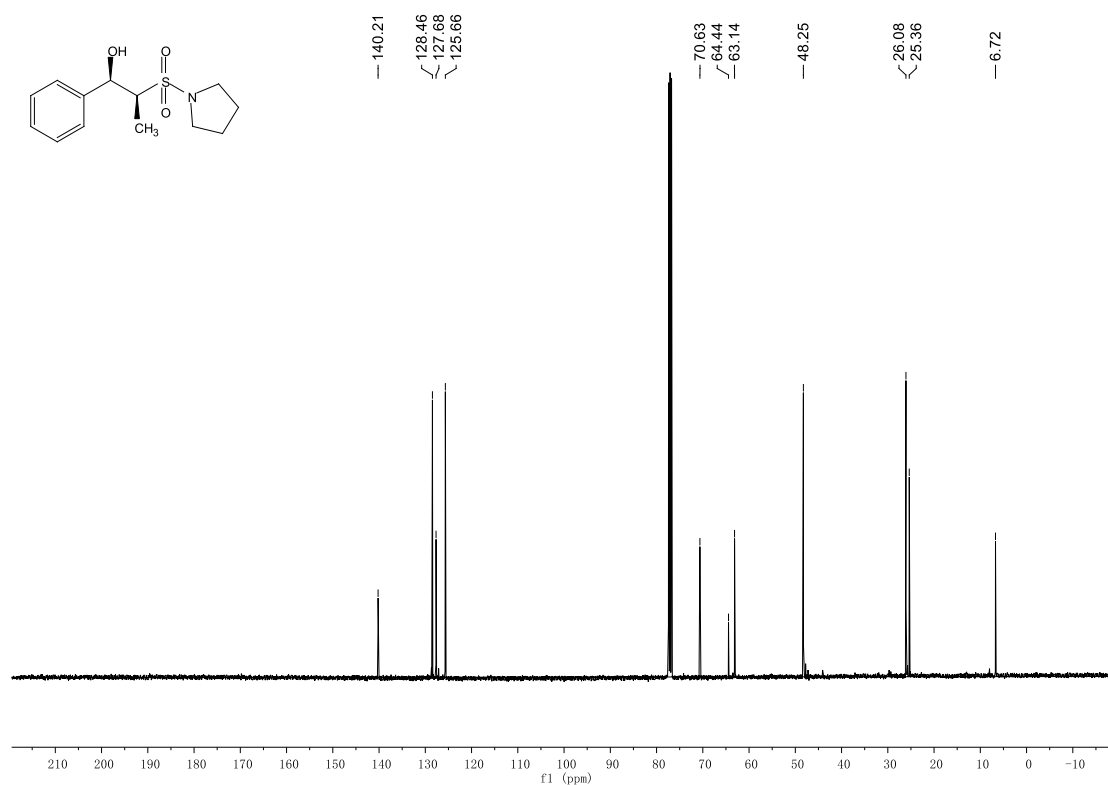

NMR spectra of **2k**

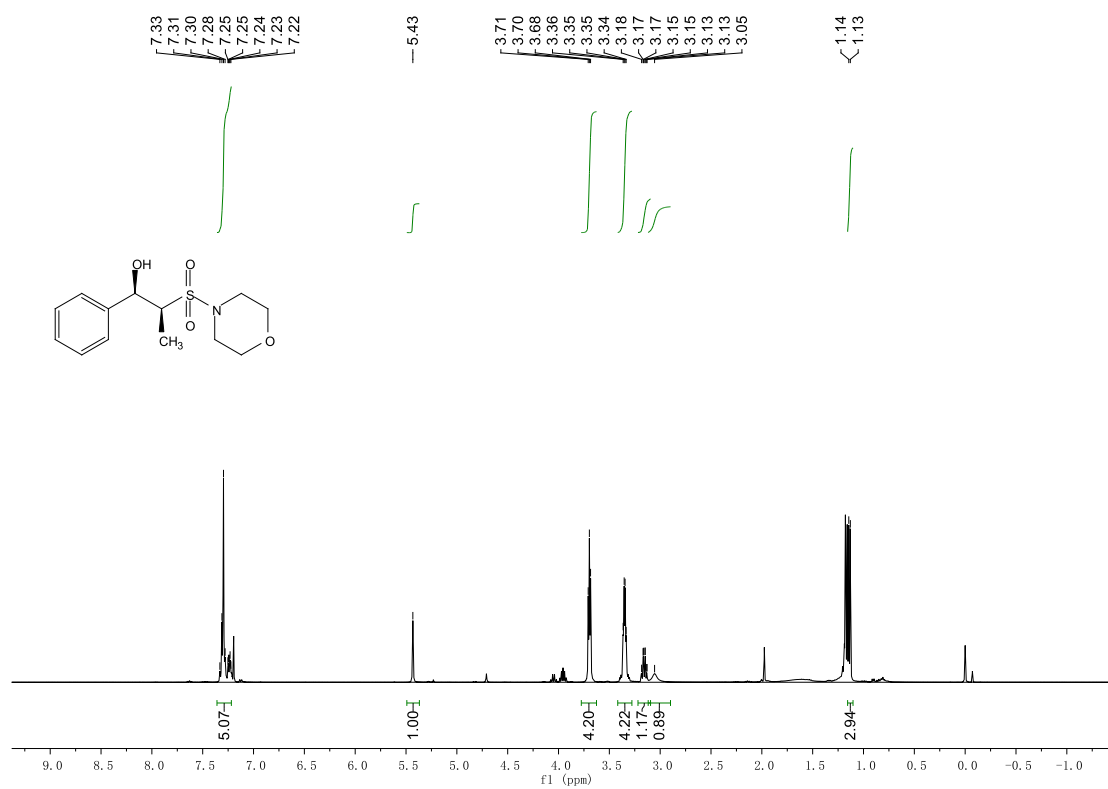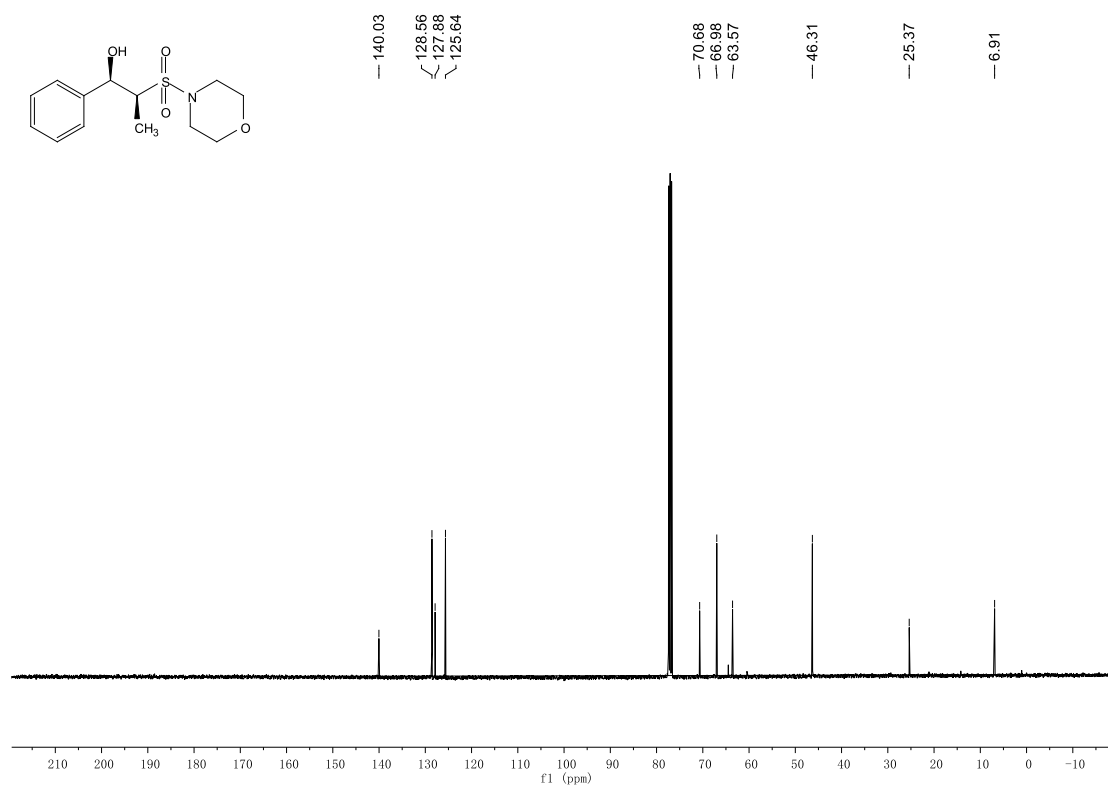

NMR spectra of **21**

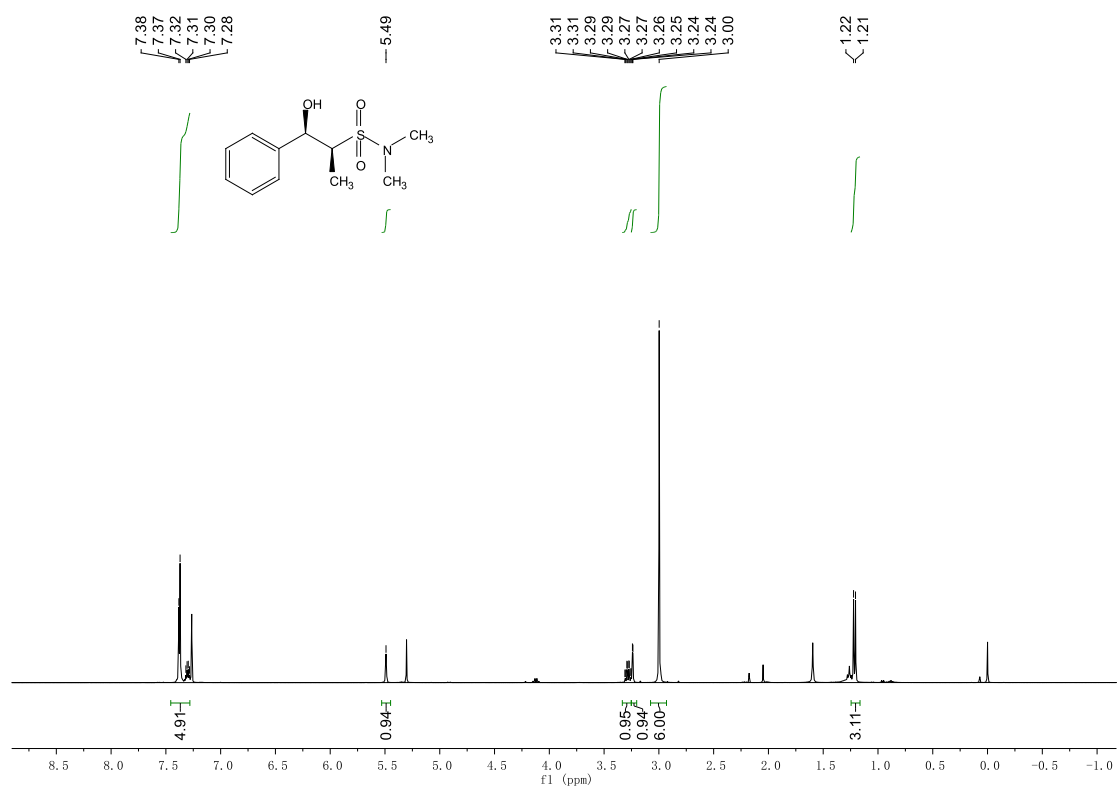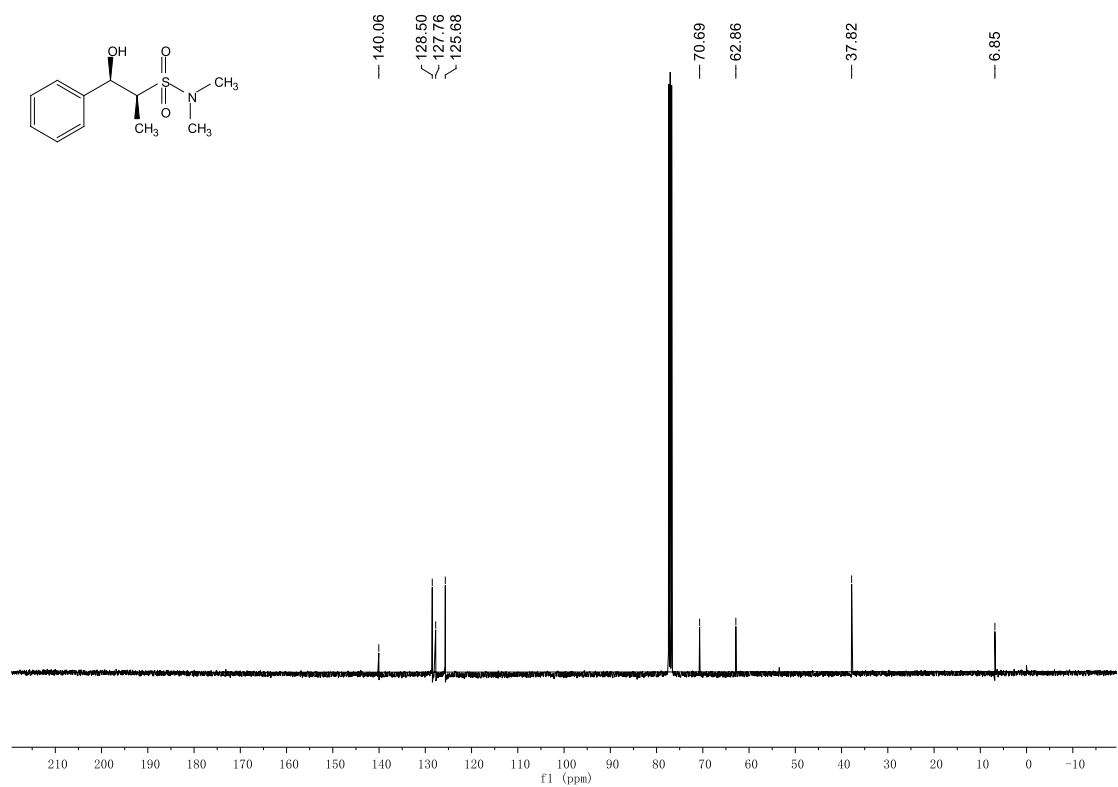

NMR spectra of **2m**

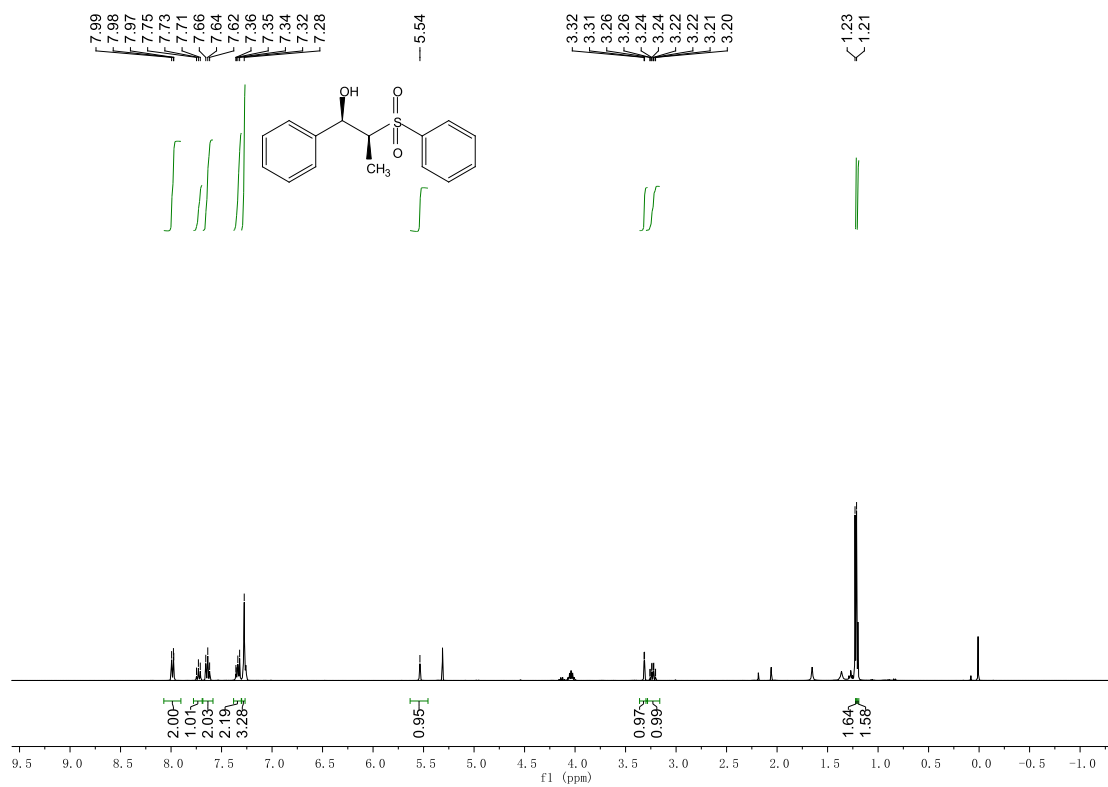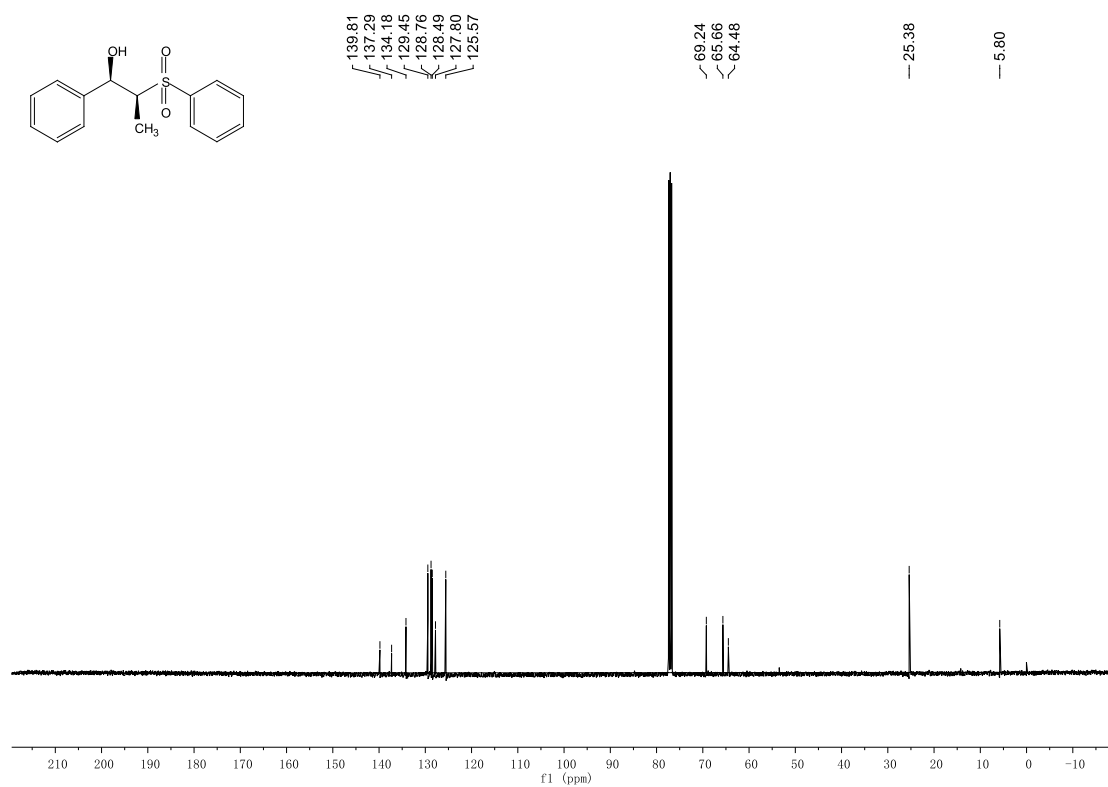

NMR spectra of **2n**

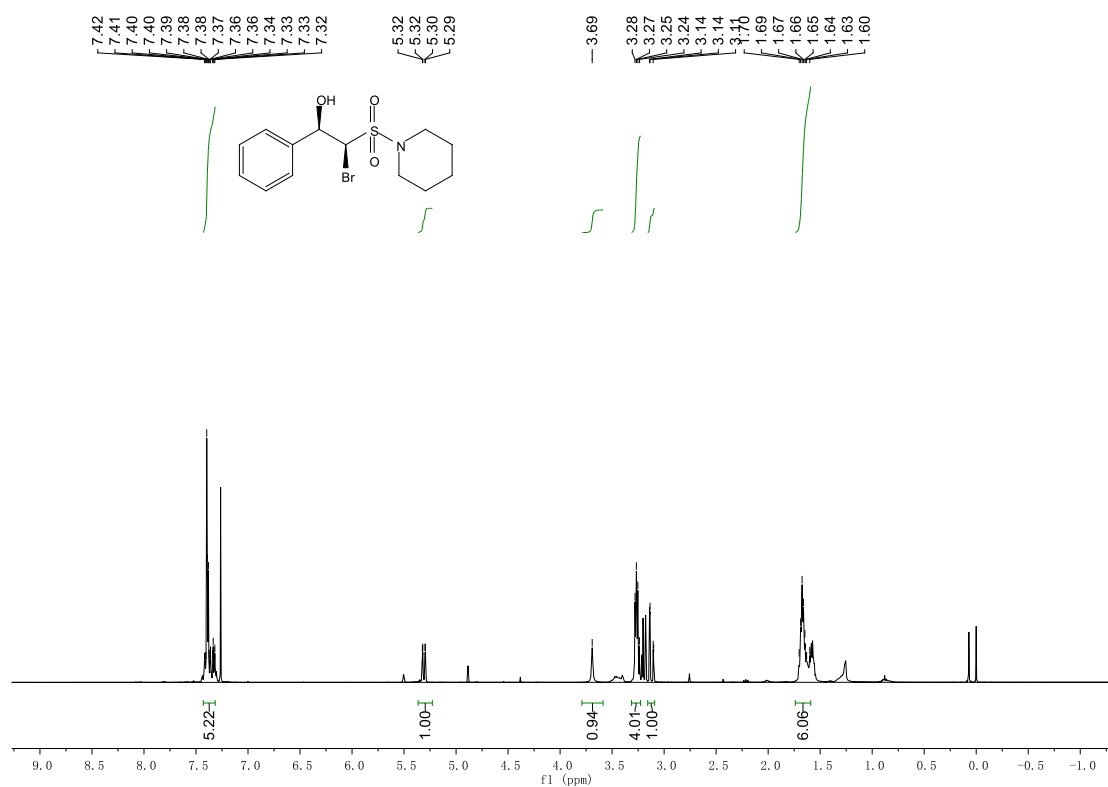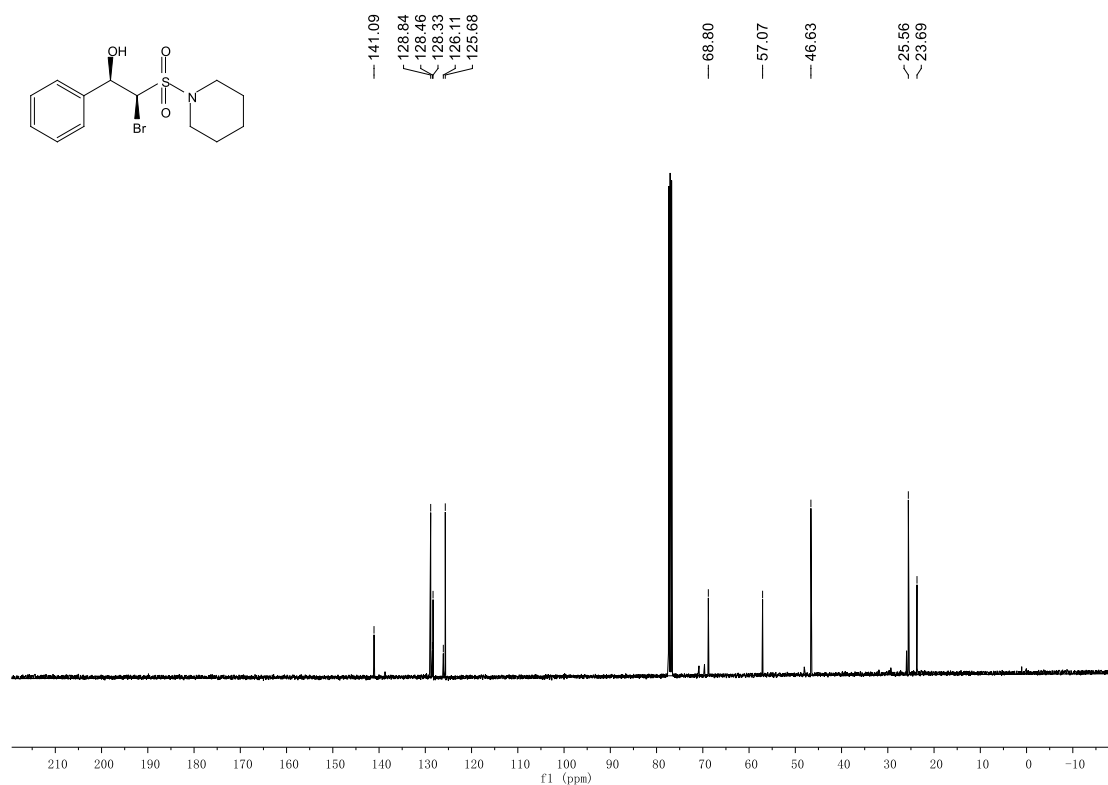

NMR spectra of **20**



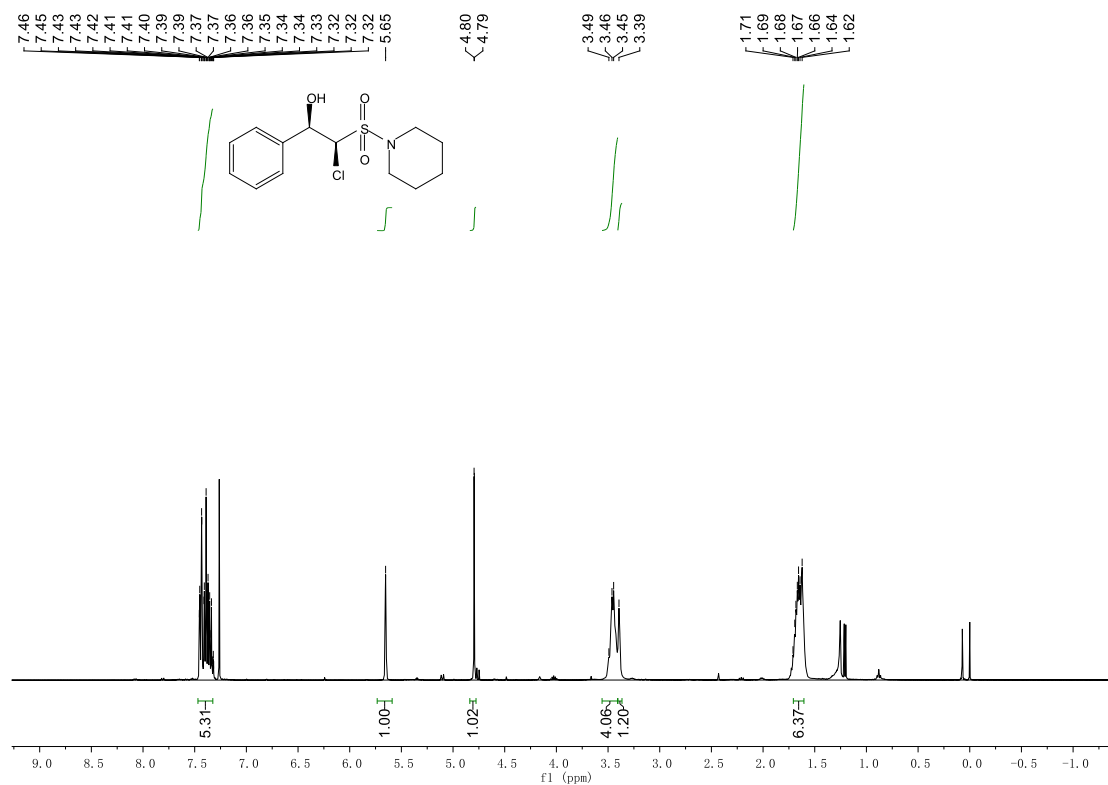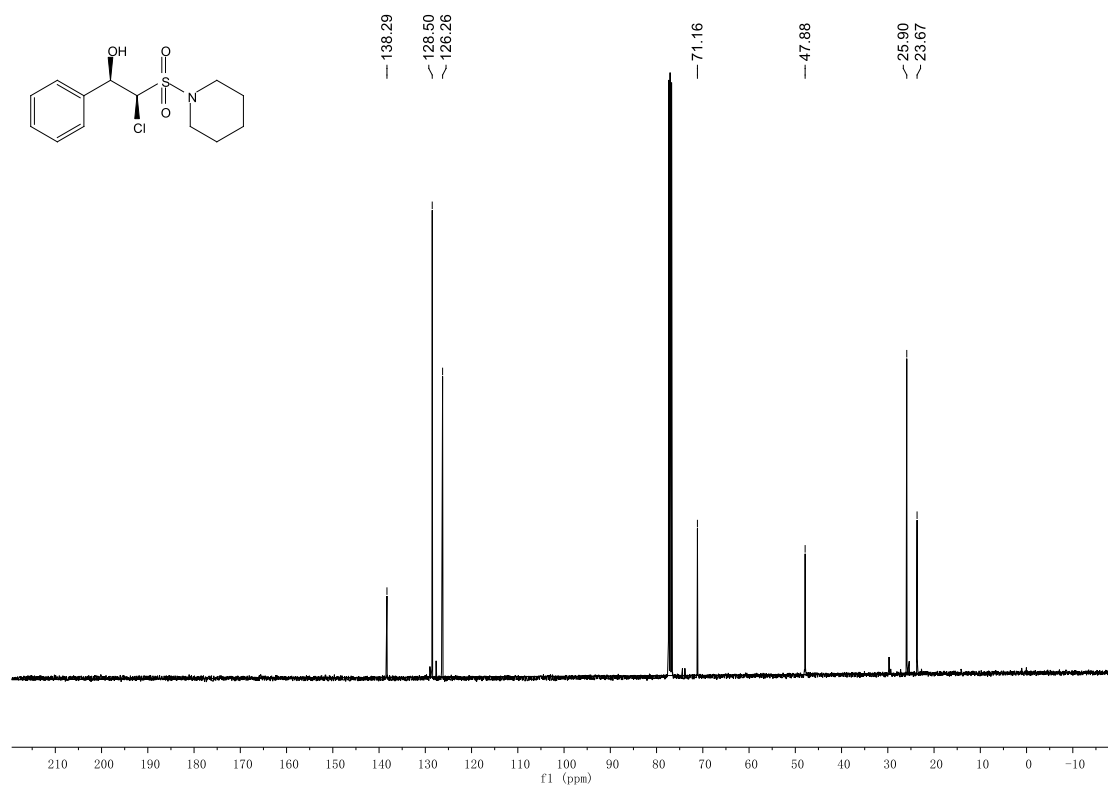

## 4. HPLC spectra of 2

Data File E:\DATA\XZC\XZC-2-67\XZC-2-67 2016-03-24 15-18-52\061-0201.D

Sample Name: XZC-2-67-RAC

```
=====
Acq. Operator   : SYSTEM                      Seq. Line :    2
Acq. Instrument : 1260HPLC-VWD                Location  : Vial 61
Injection Date  : 3/24/2016 3:32:09 PM         Inj       :    1
                                           Inj Volume: 2.000 µl
Acq. Method     : E:\DATA\XZC\XZC-2-67\XZC-2-67 2016-03-24 15-18-52\VWD-AD(1-6)-95-5-1ML-
                2UL-210NM-40MIN.M
Last changed    : 3/24/2016 3:18:53 PM by SYSTEM
Analysis Method : E:\DATA\XZC\XZC-2-67\XZC-2-67 2016-03-24 15-18-52\VWD-AD(1-6)-95-5-1ML-
                2UL-210NM-40MIN.M (Sequence Method)
Last changed    : 1/31/2018 10:45:18 AM by SYSTEM
                (modified after loading)
Additional Info : Peak(s) manually integrated
=====
```

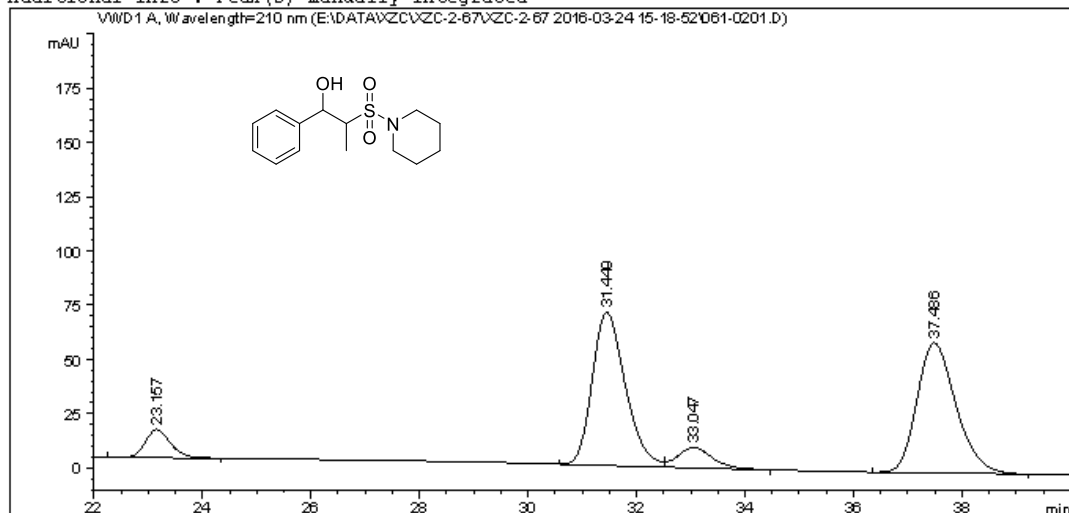

### Area Percent Report

```
Sorted By      : Signal
Multiplier     : 1.0000
Dilution       : 1.0000
Do not use Multiplier & Dilution Factor with ISTDs
```

Signal 1: VWD1 A, Wavelength=210 nm

| Peak # | RetTime [min] | Type | Width [min] | Area [mAU*s] | Height [mAU] | Area %  |
|--------|---------------|------|-------------|--------------|--------------|---------|
| 1      | 23.157        | BB   | 0.4983      | 421.81094    | 12.97389     | 6.1793  |
| 2      | 31.449        | BV   | 0.6489      | 2989.59863   | 70.61687     | 43.7959 |
| 3      | 33.047        | VB   | 0.6679      | 422.25525    | 9.47600      | 6.1858  |
| 4      | 37.486        | BB   | 0.7661      | 2992.54688   | 59.97440     | 43.8391 |

Totals : 6826.21170 153.04116

\*\*\* End of Report \*\*\*

Data File E:\DATA\XZC\XZC-SOLVENT\XZC-0108 2017-01-08 18-21-54\018-1001.D  
Sample Name: XZC-8

```
=====
Acq. Operator   : SYSTEM                      Seq. Line :   10
Acq. Instrument : 1260HPLC-DAD                Location  : Vial 18
Injection Date  : 1/8/2017 11:31:08 PM        Inj       :    1
                                           Inj Volume: 2.000 µl

Acq. Method     : E:\DATA\XZC\XZC-SOLVENT\XZC-0108 2017-01-08 18-21-54\
DAD-AD(1-6)-95-5-1ML-2UL-ALL-40MIN.M
Last changed    : 1/8/2017 6:21:54 PM by SYSTEM
Analysis Method : E:\DATA\XZC\XZC-SOLVENT\XZC-0108 2017-01-08 18-21-54\
DAD-AD(1-6)-95-5-1ML-2UL-ALL-40MIN.M (Sequence Method)
Last changed    : 1/31/2018 11:14:59 AM by SYSTEM
                (modified after loading)
Additional Info : Peak(s) manually integrated
=====
```

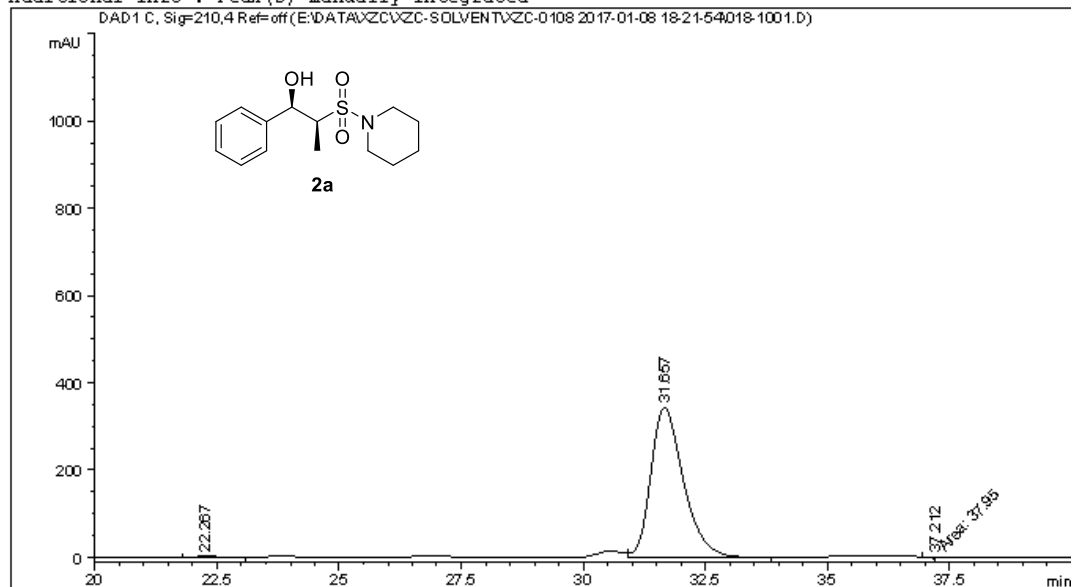

# Area Percent Report

```
Sorted By      :      Signal
Multiplier     :      1.0000
Dilution       :      1.0000
Do not use Multiplier & Dilution Factor with ISTDs
```

Signal 1: DAD1 C, Sig=210,4 Ref=off

| Peak # | RetTime [min] | Type | Width [min] | Area [mAU*s] | Height [mAU] | Area %  |
|--------|---------------|------|-------------|--------------|--------------|---------|
| 1      | 22.267        | BB   | 0.3636      | 73.06175     | 2.43803      | 0.4573  |
| 2      | 31.657        | VB   | 0.7057      | 1.58643e4    | 342.95178    | 99.3051 |
| 3      | 37.212        | MM   | 0.2184      | 37.95001     | 2.89608      | 0.2376  |

Totals : 1.59753e4 348.28589

Data File E:\DATA\XZC\XZC-DATA-1\XZC-20180206 2018-02-06 14:52-19\031-0401.D  
Sample Name: XZC-pMeO-RAC

```
=====
Acq. Operator   : SYSTEM                      Seq. Line :    4
Acq. Instrument : 1260HPLC-VWD                Location  : Vial 31
Injection Date  : 2/6/2018 4:11:48 PM          Inj       :    1
                                           Inj Volume: 3.000 µl

Acq. Method     : E:\DATA\XZC\XZC-DATA-1\XZC-20180206 2018-02-06 14:52-19\VWD-AD(1-2)-90-
                  10-1ML-3UL-210NM-60MIN.M
Last changed    : 2/6/2018 2:52:19 PM by SYSTEM
Analysis Method : E:\DATA\XZC\XZC-DATA-1\XZC-20180206 2018-02-06 14:52-19\VWD-AD(1-2)-90-
                  10-1ML-3UL-210NM-60MIN.M (Sequence Method)
Last changed    : 2/7/2018 5:31:16 PM by SYSTEM
                  (modified after loading)
Additional Info  : Peak(s) manually integrated
=====
```

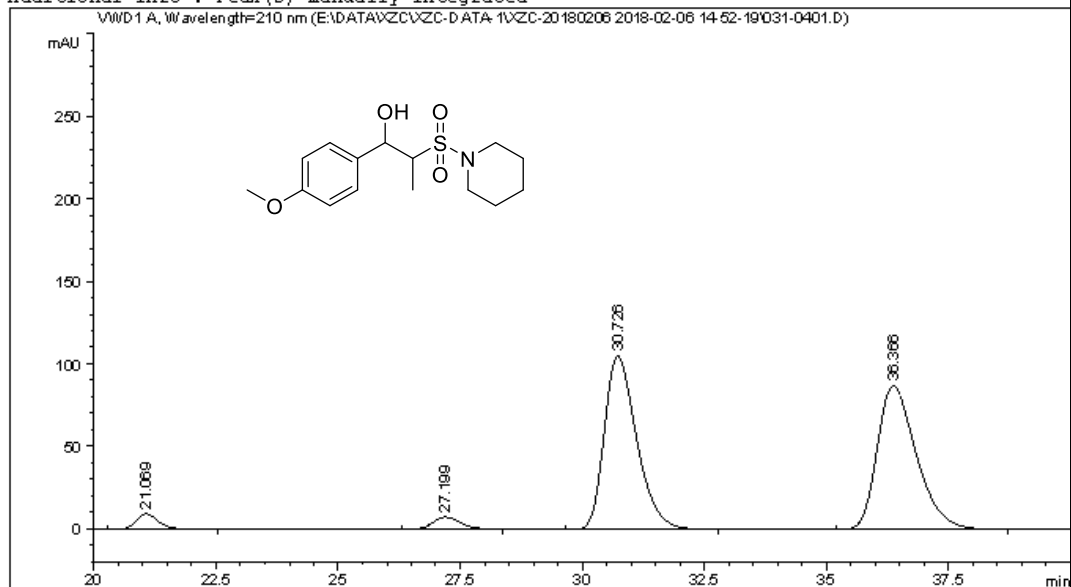

=====  
Area Percent Report  
=====

Sorted By : Signal  
Multiplier : 1.0000  
Dilution : 1.0000  
Do not use Multiplier & Dilution Factor with ISTDs

Signal 1: VWD1 A, Wavelength=210 nm

| Peak # | RetTime [min] | Type | Width [min] | Area [mAU*s] | Height [mAU] | Area %  |
|--------|---------------|------|-------------|--------------|--------------|---------|
| 1      | 21.069        | BB   | 0.4805      | 297.71381    | 9.40053      | 2.9016  |
| 2      | 27.199        | BB   | 0.5998      | 287.37119    | 7.29231      | 2.8008  |
| 3      | 30.726        | BB   | 0.7111      | 4836.73535   | 105.05968    | 47.1408 |
| 4      | 36.366        | BB   | 0.8573      | 4838.36865   | 86.93582     | 47.1567 |

Totals : 1.02602e4 208.68834

Data File E:\DATA\XZC\XZC-DATA-1\XZC-20180206 2018-02-07 16-27-24\051-0201.D  
Sample Name: XZC-pMeO

```
=====
Acq. Operator   : SYSTEM                      Seq. Line :    2
Acq. Instrument : 1260HPLC-VWD                Location  : Vial 51
Injection Date  : 2/7/2018 4:34:07 PM          Inj       :    1
                                           Inj Volume: 3.000 µl

Acq. Method     : E:\DATA\XZC\XZC-DATA-1\XZC-20180206 2018-02-07 16-27-24\VWD-AD(1-2)-90-
                  10-1ML-3UL-210NM-55MIN.M
Last changed    : 2/7/2018 5:01:54 PM by SYSTEM
                  (modified after loading)
Analysis Method : E:\DATA\XZC\XZC-DATA-1\XZC-20180206 2018-02-07 16-27-24\VWD-AD(1-2)-90-
                  10-1ML-3UL-210NM-55MIN.M (Sequence Method)
Last changed    : 2/7/2018 5:20:57 PM by SYSTEM
                  (modified after loading)
Additional Info  : Peak(s) manually integrated
=====
```

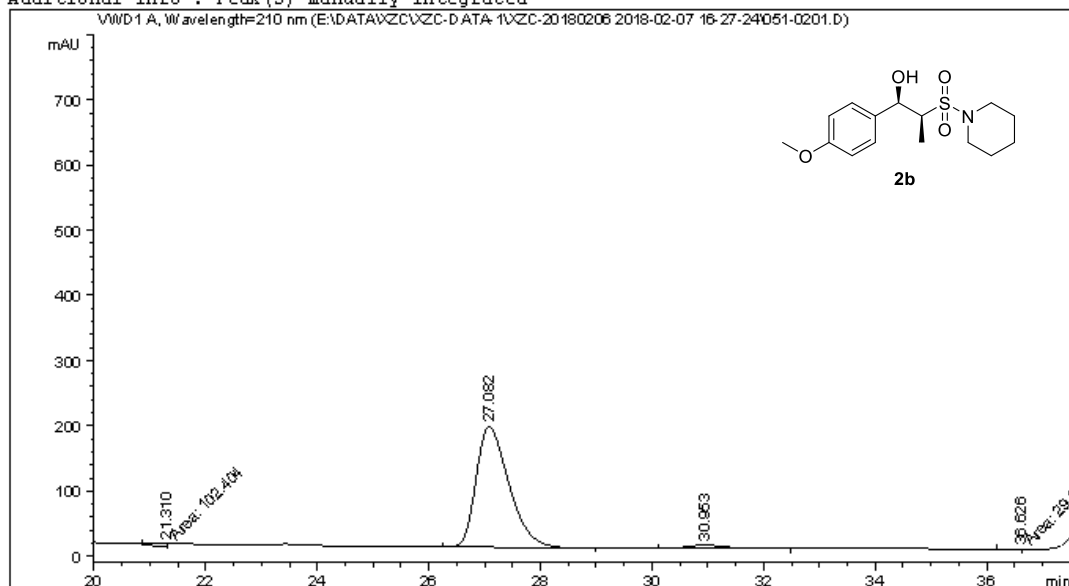

# Area Percent Report

```
Sorted By      :      Signal
Multiplier     :      1.0000
Dilution       :      1.0000
Do not use Multiplier & Dilution Factor with ISTDs
```

Signal 1: VWD1 A, Wavelength=210 nm

| Peak # | RetTime [min] | Type | Width [min] | Area [mAU*s] | Height [mAU] | Area %  |
|--------|---------------|------|-------------|--------------|--------------|---------|
| 1      | 21.310        | MM   | 0.3104      | 102.40383    | 5.49849      | 1.2971  |
| 2      | 27.082        | BB   | 0.6249      | 7546.66797   | 184.60147    | 95.5934 |
| 3      | 30.953        | BB   | 0.6843      | 216.19571    | 4.72986      | 2.7385  |
| 4      | 36.626        | MM   | 0.4421      | 29.27939     | 1.10390      | 0.3709  |

Totals : 7894.54690 195.93371

Data File E:\DATA\XZC\XZC-2-100\XZC-2-100 2016-05-12 14:37:47\001-0201.D  
Sample Name: XZC-pF-RAC

```

=====
Acq. Operator   : SYSTEM                      Seq. Line :    2
Acq. Instrument : 1260HPLC-VWD                Location  : Vial 1
Injection Date  : 5/12/2016 2:49:23 PM         Inj       :    1
                                           Inj Volume: 4.000 µl
Acq. Method     : E:\DATA\XZC\XZC-2-100\XZC-2-100 2016-05-12 14:37:47\VWD-AD (1-6)-92-8-1ML
                  -4UL-210-40MIN.M
Last changed    : 5/12/2016 2:37:47 PM by SYSTEM
Analysis Method : E:\DATA\XZC\XZC-2-100\XZC-2-100 2016-05-12 14:37:47\VWD-AD (1-6)-92-8-1ML
                  -4UL-210-40MIN.M (Sequence Method)
Last changed    : 11/28/2017 4:23:15 PM by SYSTEM
                  (modified after loading)
Additional Info : Peak(s) manually integrated
=====

```

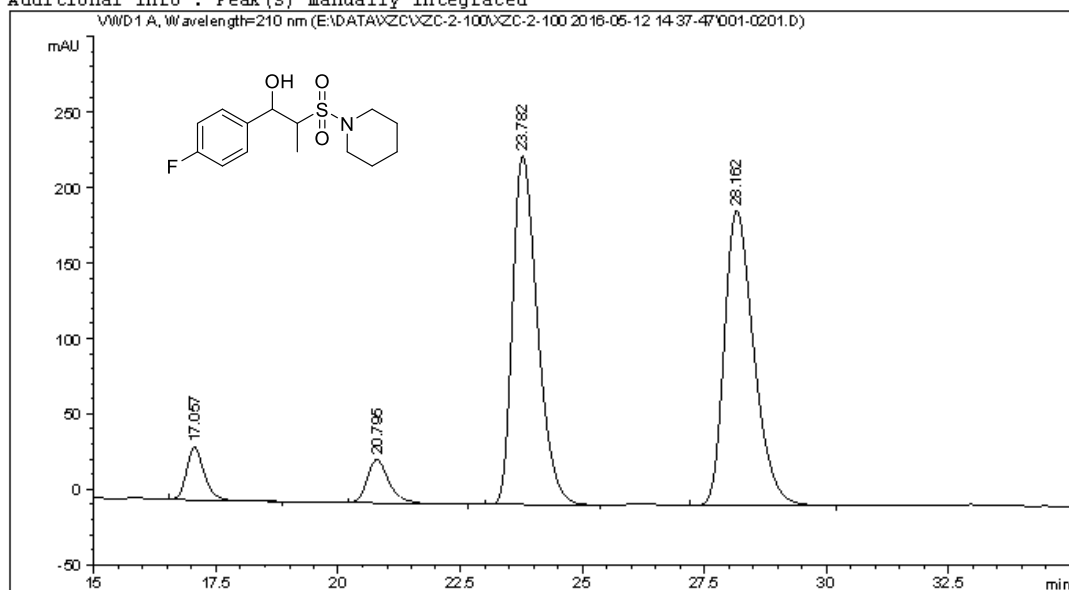

# Area Percent Report

```

Sorted By      :      Signal
Multiplier     :      1.0000
Dilution       :      1.0000
Do not use Multiplier & Dilution Factor with ISTDs

```

Signal 1: VWD1 A, Wavelength=210 nm

| Peak # | RetTime [min] | Type | Width [min] | Area [mAU*s] | Height [mAU] | Area %  |
|--------|---------------|------|-------------|--------------|--------------|---------|
| 1      | 17.057        | VB   | 0.3898      | 899.51599    | 35.00694     | 4.9471  |
| 2      | 20.795        | BB   | 0.4714      | 889.47961    | 28.71784     | 4.8919  |
| 3      | 23.782        | BB   | 0.5454      | 8183.15869   | 230.95163    | 45.0055 |
| 4      | 28.162        | BB   | 0.6484      | 8210.42480   | 195.33456    | 45.1554 |

Totals : 1.81826e4 490.01097

Data File E:\DATA\XZC\XZC-2-100\XZC-2-100 2016-05-12 14:37-47\002-0301.D  
Sample Name: XZC-pF

```
=====
Acq. Operator   : SYSTEM                      Seq. Line :    3
Acq. Instrument : 1260HPLC-VWD                Location  : Vial 2
Injection Date  : 5/12/2016 3:30:05 PM         Inj       :    1
                                           Inj Volume: 4.000 µl
Acq. Method     : E:\DATA\XZC\XZC-2-100\XZC-2-100 2016-05-12 14:37-47\VWD-AD (1-6)-92-8-1ML
                  -4UL-210-40MIN.M
Last changed    : 5/12/2016 2:37:47 PM by SYSTEM
Analysis Method : E:\DATA\XZC\XZC-2-100\XZC-2-100 2016-05-12 14:37-47\VWD-AD (1-6)-92-8-1ML
                  -4UL-210-40MIN.M (Sequence Method)
Last changed    : 1/30/2018 9:47:38 PM by SYSTEM
                  (modified after loading)
Additional Info : Peak(s) manually integrated
=====
```

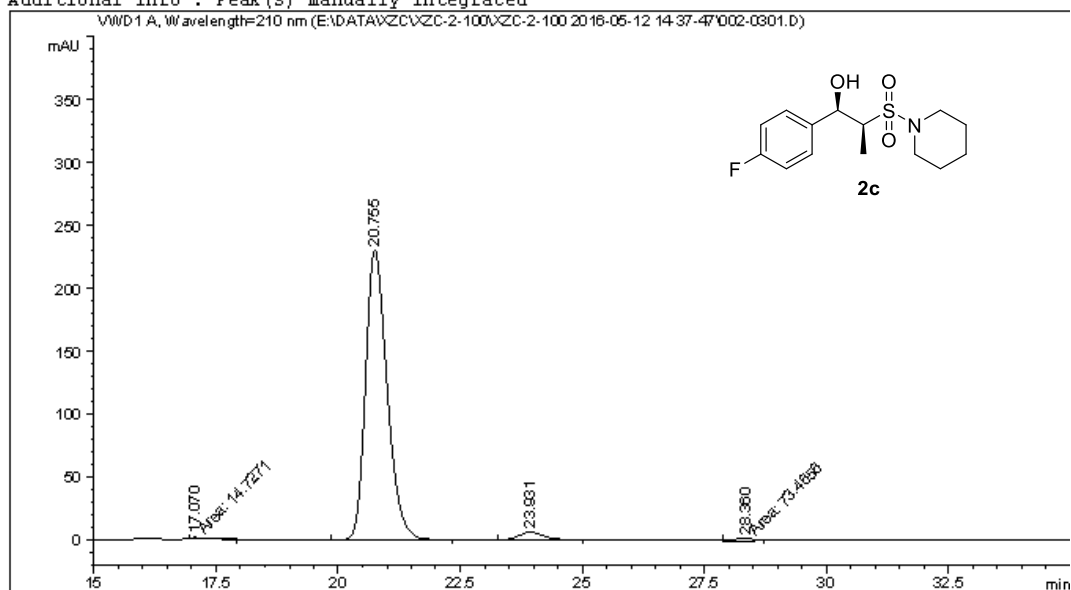

Area Percent Report

```
Sorted By      : Signal
Multiplier     : 1.0000
Dilution       : 1.0000
Do not use Multiplier & Dilution Factor with ISTDs
```

Signal 1: VWD1 A, Wavelength=210 nm

| Peak # | RetTime [min] | Type | Width [min] | Area [mAU*s] | Height [mAU] | Area %  |
|--------|---------------|------|-------------|--------------|--------------|---------|
| 1      | 17.070        | MM   | 0.2400      | 14.72710     | 1.02256      | 0.2004  |
| 2      | 20.755        | BB   | 0.4715      | 7050.44043   | 230.05257    | 95.9543 |
| 3      | 23.931        | BB   | 0.5263      | 209.07404    | 5.94462      | 2.8454  |
| 4      | 28.360        | MM   | 0.5776      | 73.46560     | 1.59887      | 0.9998  |

Totals : 7347.70716 238.61861

Data File E:\DATA\XZC\XZC-1212\XZC-171205-1 2017-12-05 15-33-56\012-0401.D  
Sample Name: XZC-pCl-RAC

```
=====
Acq. Operator   : SYSTEM                      Seq. Line :    4
Acq. Instrument : 1260HPLC-VWD                Location  : Vial 12
Injection Date  : 12/5/2017 4:57:02 PM        Inj       :    1
                                           Inj Volume: 3.000 µl
Acq. Method     : E:\DATA\XZC\XZC-1212\XZC-171205-1 2017-12-05 15-33-56\VWD-AD(1-2)-90-10-
                  1ML-3UL-210NM-60MIN.M
Last changed    : 12/5/2017 3:33:56 PM by SYSTEM
Analysis Method : E:\DATA\XZC\XZC-1212\XZC-171205-1 2017-12-05 15-33-56\VWD-AD(1-2)-90-10-
                  1ML-3UL-210NM-60MIN.M (Sequence Method)
Last changed    : 12/5/2017 7:31:54 PM by SYSTEM
                  (modified after loading)
Additional Info : Peak(s) manually integrated
=====
```

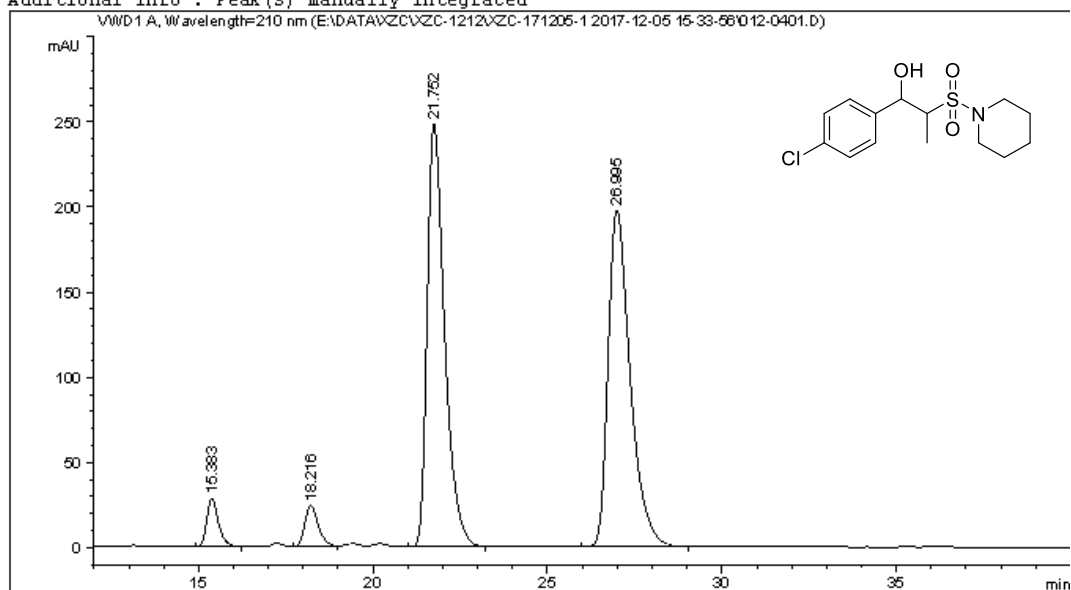

Area Percent Report

```
Sorted By      : Signal
Multiplier     : 1.0000
Dilution      : 1.0000
Do not use Multiplier & Dilution Factor with ISTDs
```

Signal 1: VWD1 A, Wavelength=210 nm

| Peak # | RetTime [min] | Type | Width [min] | Area [mAU*s] | Height [mAU] | Area %  |
|--------|---------------|------|-------------|--------------|--------------|---------|
| 1      | 15.383        | BB   | 0.3529      | 664.29095    | 28.50526     | 3.5790  |
| 2      | 18.216        | BB   | 0.4116      | 643.54938    | 23.86432     | 3.4672  |
| 3      | 21.752        | BB   | 0.5257      | 8609.07129   | 248.15921    | 46.3830 |
| 4      | 26.995        | BB   | 0.6656      | 8643.92383   | 197.49571    | 46.5708 |

Totals : 1.85608e4 498.02450



Data File E:\DATA\XZC\XZC-DATA-1\XZC-20171207-1 2017-12-07 19-39-37\044-0701.D  
Sample Name: XZC-pCl

```
=====
Acq. Operator   : SYSTEM                      Seq. Line :    7
Acq. Instrument : 1260HPLC-VWD                Location  : Vial 44
Injection Date  : 12/7/2017 11:01:41 PM       Inj       :    1
                                           Inj Volume: 3.000 µl

Acq. Method     : E:\DATA\XZC\XZC-DATA-1\XZC-20171207-1 2017-12-07 19-39-37\VWD-AD (1-2)-90
                  -10-1ML-3UL-210NM-35MIN.M
Last changed    : 12/7/2017 9:21:36 PM by SYSTEM
Analysis Method : E:\DATA\XZC\XZC-DATA-1\XZC-20171207-1 2017-12-07 19-39-37\VWD-AD (1-2)-90
                  -10-1ML-3UL-210NM-35MIN.M (Sequence Method)
Last changed    : 12/8/2017 3:43:40 PM by SYSTEM
                  (modified after loading)
Additional Info : Peak(s) manually integrated
=====
```

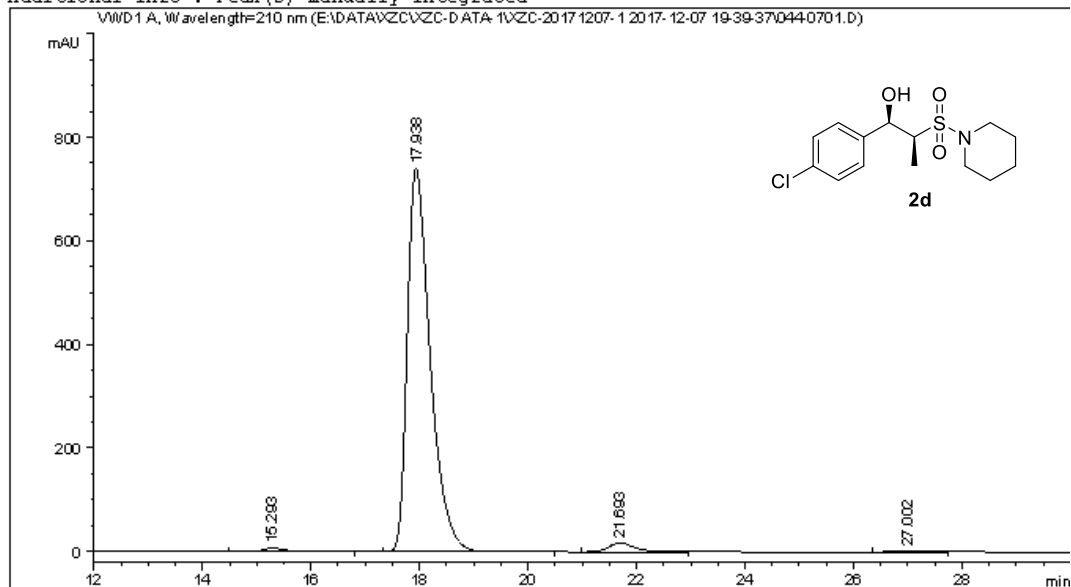

=====  
Area Percent Report  
=====

Sorted By : Signal  
Multiplier : 1.0000  
Dilution : 1.0000  
Do not use Multiplier & Dilution Factor with ISTDs

Signal 1: VWD1 A, Wavelength=210 nm

| Peak # | RetTime [min] | Type | Width [min] | Area [mAU*s] | Height [mAU] | Area %  |
|--------|---------------|------|-------------|--------------|--------------|---------|
| 1      | 15.293        | BB   | 0.4480      | 232.02040    | 7.39508      | 1.0296  |
| 2      | 17.938        | BB   | 0.4440      | 2.16397e4    | 740.34814    | 96.0304 |
| 3      | 21.693        | BB   | 0.5052      | 574.63031    | 17.26842     | 2.5500  |
| 4      | 27.002        | BB   | 0.5256      | 87.86292     | 2.47838      | 0.3899  |

Totals : 2.25342e4 767.49003

Data File E:\DATA\XZC\XZC-1212\XZC-171205-1 2017-12-05 15-33-56\013-0301.D  
Sample Name: XZC-pBr-RAC

```
=====
Acq. Operator   : SYSTEM                      Seq. Line :    3
Acq. Instrument : 1260HPLC-VWD                Location  : Vial 13
Injection Date  : 12/5/2017 3:56:19 PM        Inj       :    1
                                           Inj Volume: 3.000 µl
Acq. Method     : E:\DATA\XZC\XZC-1212\XZC-171205-1 2017-12-05 15-33-56\VWD-AD(1-2)-90-10-
                  1ML-3UL-210NM-60MIN.M
Last changed    : 12/5/2017 3:33:56 PM by SYSTEM
Analysis Method : E:\DATA\XZC\XZC-1212\XZC-171205-1 2017-12-05 15-33-56\VWD-AD(1-2)-90-10-
                  1ML-3UL-210NM-60MIN.M (Sequence Method)
Last changed    : 12/5/2017 7:33:52 PM by SYSTEM
                  (modified after loading)
Additional Info : Peak(s) manually integrated
=====
```

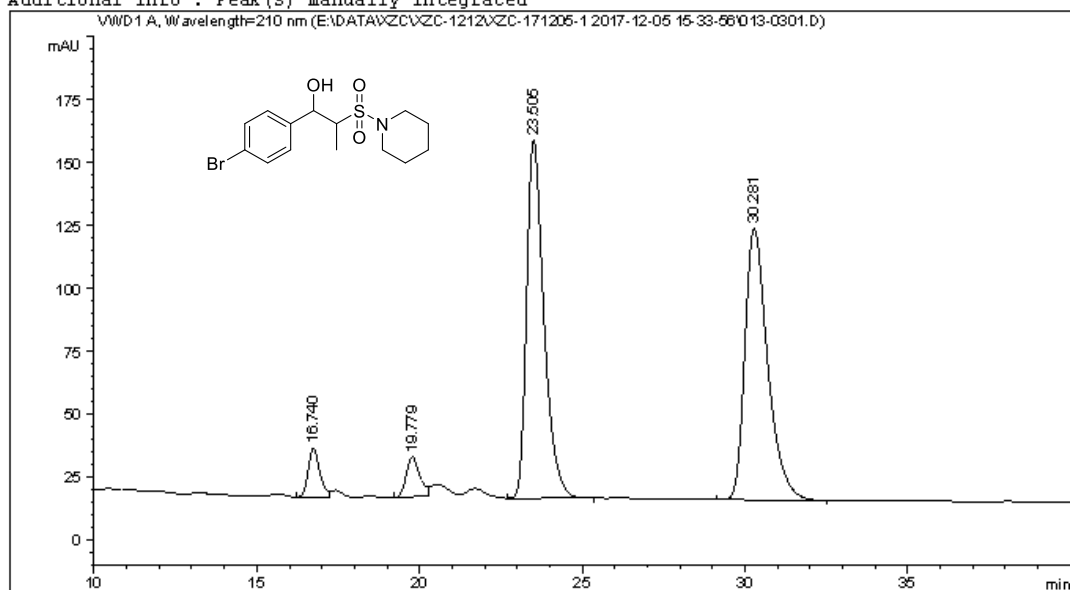

# Area Percent Report

```
Sorted By      :      Signal
Multiplier     :      1.0000
Dilution       :      1.0000
Do not use Multiplier & Dilution Factor with ISTDs
```

Signal 1: VWD1 A, Wavelength=210 nm

| Peak # | RetTime [min] | Type | Width [min] | Area [mAU*s] | Height [mAU] | Area %  |
|--------|---------------|------|-------------|--------------|--------------|---------|
| 1      | 16.740        | BV   | 0.3770      | 483.89499    | 19.53674     | 4.2205  |
| 2      | 19.779        | BV   | 0.4401      | 453.79520    | 15.75098     | 3.9580  |
| 3      | 23.505        | BB   | 0.5596      | 5252.73975   | 142.31259    | 45.8139 |
| 4      | 30.281        | BB   | 0.7396      | 5274.95996   | 108.05169    | 46.0077 |

Totals : 1.14654e4 285.65200

Data File E:\DATA\XZC\XZC-1212\XZC-171205-1 2017-12-05 18-34-24\085-0701.D  
Sample Name: XZC-pBr

```
=====
Acq. Operator   : SYSTEM                      Seq. Line :    7
Acq. Instrument : 1260HPLC-VWD                Location  : Vial 85
Injection Date  : 12/5/2017 9:49:50 PM        Inj       :    1
                                           Inj Volume: 3.000 µl

Acq. Method     : E:\DATA\XZC\XZC-1212\XZC-171205-1 2017-12-05 18-34-24\VWD-AD(1-2)-90-10-
                  1ML-3UL-210NM-35MIN.M
Last changed    : 12/5/2017 7:44:47 PM by SYSTEM
Analysis Method : E:\DATA\XZC\XZC-1212\XZC-171205-1 2017-12-05 18-34-24\VWD-AD(1-2)-90-10-
                  1ML-3UL-210NM-35MIN.M (Sequence Method)
Last changed    : 12/6/2017 9:45:16 AM by SYSTEM
                  (modified after loading)
Additional Info : Peak(s) manually integrated
=====
```

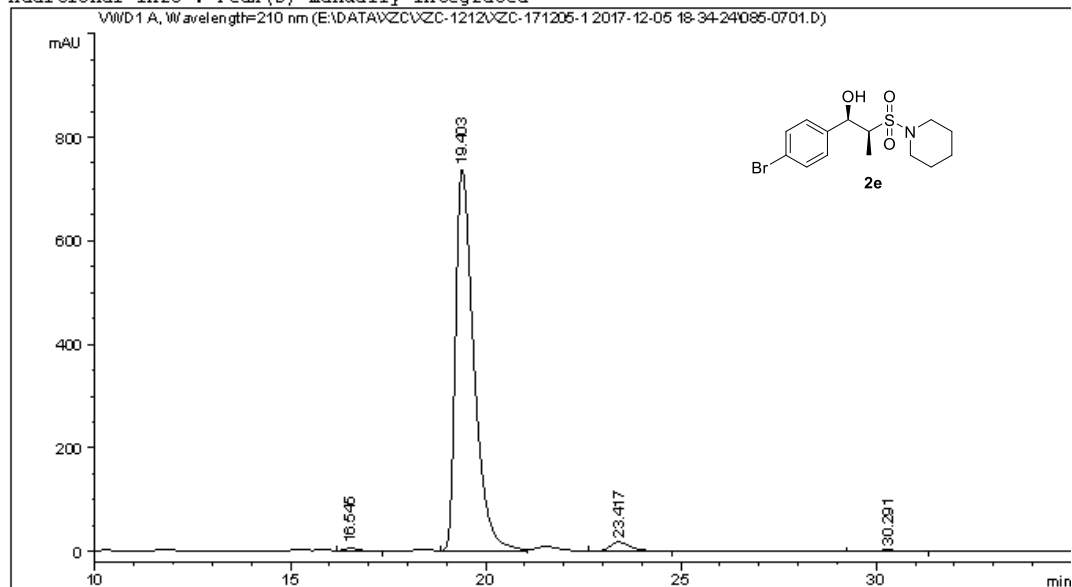

=====  
Area Percent Report  
=====

```
Sorted By      :      Signal
Multiplier     :      1.0000
Dilution       :      1.0000
Do not use Multiplier & Dilution Factor with ISTDs
```

Signal 1: VWD1 A, Wavelength=210 nm

| Peak # | RetTime [min] | Type | Width [min] | Area [mAU*s] | Height [mAU] | Area %  |
|--------|---------------|------|-------------|--------------|--------------|---------|
| 1      | 16.545        | VB   | 0.4059      | 166.05728    | 6.05576      | 0.6628  |
| 2      | 19.403        | VV   | 0.4950      | 2.41477e4    | 737.42615    | 96.3779 |
| 3      | 23.417        | BB   | 0.5564      | 647.40631    | 17.58978     | 2.5839  |
| 4      | 30.291        | BB   | 0.6023      | 94.07124     | 1.92788      | 0.3755  |

Totals :                      2.50553e4    762.99957

Data File E:\DATA\XZC\XZC-1212\XZC-1212 2016-12-12 02-35-04\035-0701.D  
Sample Name: xzc-CF3-rac

```
=====
Acq. Operator   : SYSTEM                      Seq. Line :    7
Acq. Instrument : 1260HPLC-VWD                Location  : Vial 35
Injection Date  : 12/12/2016 5:01:36 AM       Inj       :    1
                                           Inj Volume: 4.000 µl

Acq. Method     : E:\DATA\XZC\XZC-1212\XZC-1212 2016-12-12 02-35-04\VWD-AD(1-6)-95-5-1ML-
                  4UL-210NM-50MIN.M
Last changed    : 12/12/2016 2:35:05 AM by SYSTEM
Analysis Method : E:\DATA\XZC\XZC-1212\XZC-1212 2016-12-12 02-35-04\VWD-AD(1-6)-95-5-1ML-
                  4UL-210NM-50MIN.M (Sequence Method)
Last changed    : 11/28/2017 4:40:11 PM by SYSTEM
                  (modified after loading)
Additional Info : Peak(s) manually integrated
=====
```

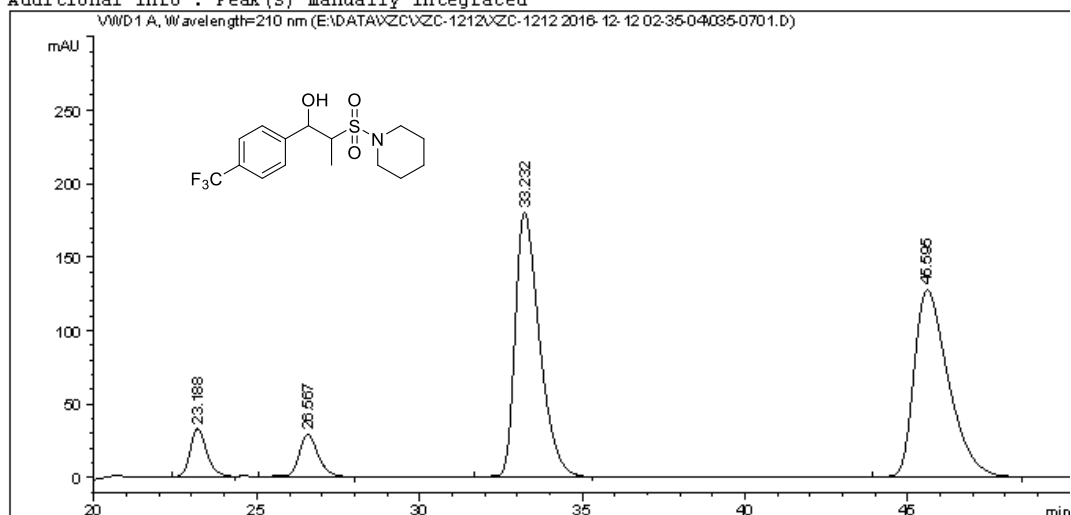

# Area Percent Report

```
Sorted By      : Signal
Multiplier     : 1.0000
Dilution       : 1.0000
Do not use Multiplier & Dilution Factor with ISTDs
```

Signal 1: VWD1 A, Wavelength=210 nm

| Peak # | RetTime [min] | Type | Width [min] | Area [mAU*s] | Height [mAU] | Area %  |
|--------|---------------|------|-------------|--------------|--------------|---------|
| 1      | 23.188        | BB   | 0.5425      | 1149.04565   | 32.41593     | 5.4825  |
| 2      | 26.567        | BB   | 0.6273      | 1200.33289   | 29.03751     | 5.7272  |
| 3      | 33.232        | BB   | 0.7942      | 9298.99902   | 179.55937    | 44.3685 |
| 4      | 45.595        | BB   | 1.1117      | 9310.17188   | 127.37707    | 44.4218 |

Totals : 2.09585e4 368.38988

\*\*\* End of Report \*\*\*

Data File E:\DATA\XZC\XZC-DATA-1\XZC-DATA-1 2017-11-14 16-20-10\073-0701.D  
Sample Name: XZC-pCF3

```
=====
Acq. Operator   : SYSTEM                      Seq. Line :    7
Acq. Instrument : 1260HPLC-VWD                Location  : Vial 73
Injection Date  : 11/14/2017 6:35:30 PM       Inj       :    1
                                           Inj Volume: 3.000 µl

Acq. Method     : E:\DATA\XZC\XZC-DATA-1\XZC-DATA-1 2017-11-14 16-20-10\VWD-AD(1-6)-95-5-
                  1ML-3UL-210NM-50MIN.M
Last changed    : 11/14/2017 4:27:08 PM by SYSTEM
Analysis Method : E:\DATA\XZC\XZC-DATA-1\XZC-DATA-1 2017-11-14 16-20-10\VWD-AD(1-6)-95-5-
                  1ML-3UL-210NM-50MIN.M (Sequence Method)
Last changed    : 11/28/2017 4:37:32 PM by SYSTEM
                  (modified after loading)
Additional Info : Peak(s) manually integrated
=====
```

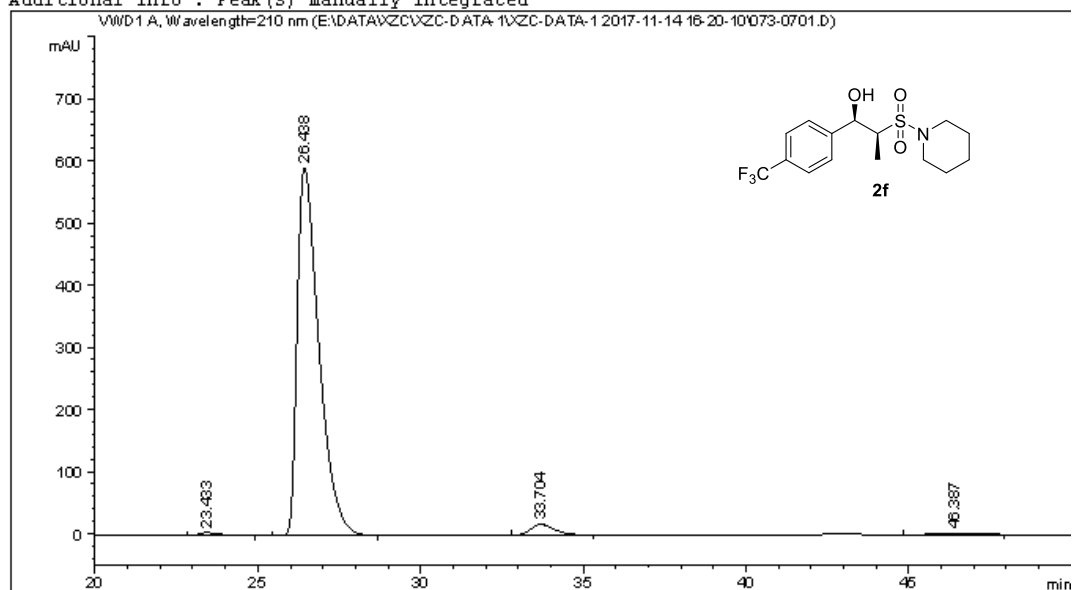

=====  
Area Percent Report  
=====

Sorted By : Signal  
Multiplier : 1.0000  
Dilution : 1.0000  
Do not use Multiplier & Dilution Factor with ISTDs

Signal 1: VWD1 A, Wavelength=210 nm

| Peak # | RetTime [min] | Type | Width [min] | Area [mAU*s] | Height [mAU] | Area %  |
|--------|---------------|------|-------------|--------------|--------------|---------|
| 1      | 23.433        | BB   | 0.6091      | 188.38914    | 4.53110      | 0.6593  |
| 2      | 26.438        | BB   | 0.7038      | 2.73050e4    | 592.32495    | 95.5608 |
| 3      | 33.704        | BB   | 0.7839      | 894.46082    | 17.36694     | 3.1304  |
| 4      | 46.387        | BB   | 0.9704      | 185.56932    | 2.43977      | 0.6494  |

Totals : 2.85734e4 616.66276

Data File E:\DATA\XZC\XZC-2-104\XZC-2-104 2016-05-15 14:56-09\005-0301.D  
Sample Name: XZC-mCl-RAC

```
=====
Acq. Operator   : SYSTEM                      Seq. Line :    3
Acq. Instrument : 1260HPLC-VWD                Location  : Vial 5
Injection Date  : 5/15/2016 3:19:36 PM        Inj       :    1
                                           Inj Volume: 2.000 µl
Acq. Method     : E:\DATA\XZC\XZC-2-104\XZC-2-104 2016-05-15 14:56-09\VWD-IB(1-2)-97-3-1ML
                  -2UL-210NM-40MIN.M
Last changed    : 5/15/2016 2:56:09 PM by SYSTEM
Analysis Method : E:\DATA\XZC\XZC-2-104\XZC-2-104 2016-05-15 14:56-09\VWD-IB(1-2)-97-3-1ML
                  -2UL-210NM-40MIN.M (Sequence Method)
Last changed    : 11/28/2017 4:26:54 PM by SYSTEM
                  (modified after loading)
Additional Info  : Peak(s) manually integrated
=====
```

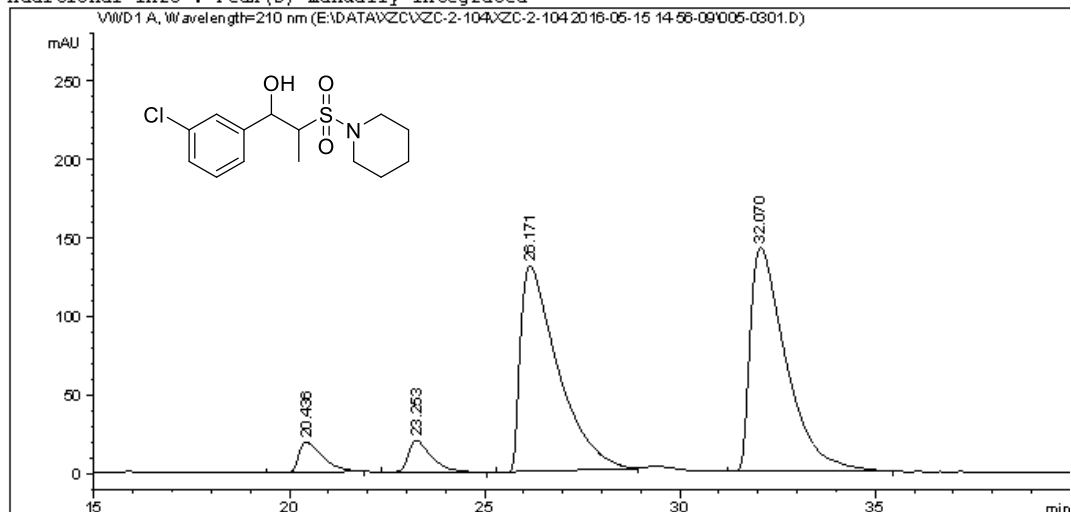

# Area Percent Report

```
Sorted By      :      Signal
Multiplier     :      1.0000
Dilution       :      1.0000
Do not use Multiplier & Dilution Factor with ISTDs
```

Signal 1: VWD1 A, Wavelength=210 nm

| Peak # | RetTime [min] | Type | Width [min] | Area [mAU*s] | Height [mAU] | Area %  |
|--------|---------------|------|-------------|--------------|--------------|---------|
| 1      | 20.436        | BB   | 0.6218      | 802.07056    | 18.91135     | 4.1311  |
| 2      | 23.253        | BB   | 0.6063      | 833.85675    | 20.33982     | 4.2948  |
| 3      | 26.171        | BB   | 0.9635      | 8723.99121   | 130.73433    | 44.9332 |
| 4      | 32.070        | BB   | 0.9634      | 9055.54590   | 142.10783    | 46.6409 |

Totals : 1.94155e4 312.09334

\*\*\* End of Report \*\*\*

Data File E:\DATA\XZC\XZC-2-104\XZC-2-104 2016-05-15 14-56-09\006-0401.D  
Sample Name: XZC-mCl

```
=====
Acq. Operator   : SYSTEM                      Seq. Line :    4
Acq. Instrument : 1260HPLC-VWD                Location  : Vial 6
Injection Date  : 5/15/2016 4:00:23 PM        Inj       :    1
                                           Inj Volume: 4.000 µl
Acq. Method     : E:\DATA\XZC\XZC-2-104\XZC-2-104 2016-05-15 14-56-09\VWD-IB (1-2)-97-3-1ML
                  -4UL-210NM-40MIN.M
Last changed    : 5/15/2016 2:56:09 PM by SYSTEM
Analysis Method : E:\DATA\XZC\XZC-2-104\XZC-2-104 2016-05-15 14-56-09\VWD-IB (1-2)-97-3-1ML
                  -4UL-210NM-40MIN.M (Sequence Method)
Last changed    : 11/28/2017 4:28:42 PM by SYSTEM
                  (modified after loading)
Additional Info : Peak(s) manually integrated
=====
```

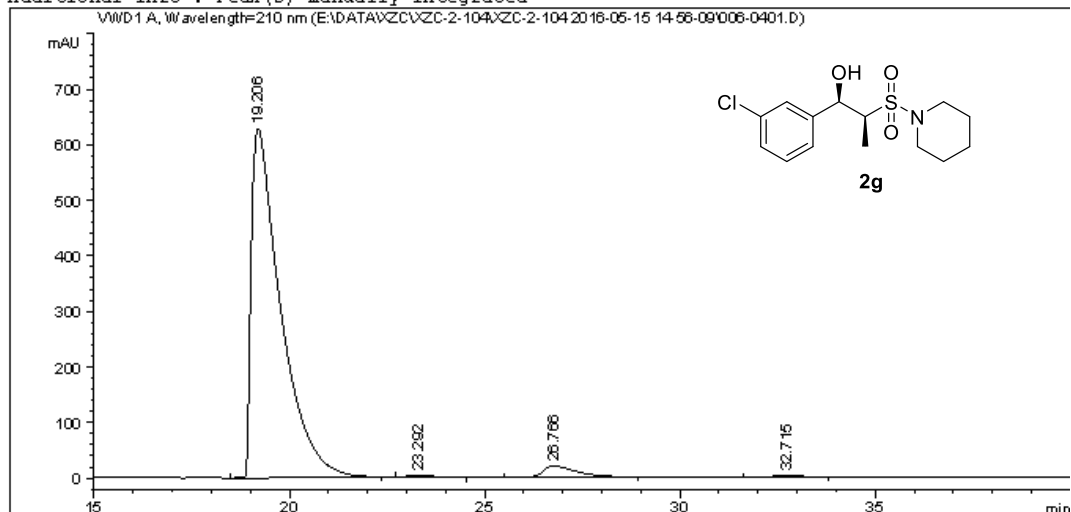

# Area Percent Report

```
Sorted By      :      Signal
Multiplier     :      1.0000
Dilution       :      1.0000
Do not use Multiplier & Dilution Factor with ISTDs
```

Signal 1: VWD1 A, Wavelength=210 nm

| Peak # | RetTime [min] | Type | Width [min] | Area [mAU*s] | Height [mAU] | Area %  |
|--------|---------------|------|-------------|--------------|--------------|---------|
| 1      | 19.206        | BB   | 0.7531      | 3.28460e4    | 629.11493    | 95.4122 |
| 2      | 23.292        | BB   | 0.6077      | 139.80862    | 3.42178      | 0.4061  |
| 3      | 26.766        | BB   | 0.8807      | 1271.44910   | 20.93083     | 3.6933  |
| 4      | 32.715        | BB   | 0.6438      | 168.11588    | 3.13922      | 0.4883  |

Totals : 3.44254e4 656.60676

\*\*\* End of Report \*\*\*

Data File E:\DATA\XZC\XZC-2-99\3-54 2016-05-10 10-53-06\001-0701.D  
Sample Name: XZC-thio-RAC

```
=====
Acq. Operator   : SYSTEM                      Seq. Line :    7
Acq. Instrument : 1260HPLC-VWD                Location  : Vial 1
Injection Date  : 5/10/2016 1:58:30 PM         Inj       :    1
                                           Inj Volume: 4.000 µl
Acq. Method     : E:\DATA\XZC\XZC-2-99\3-54 2016-05-10 10-53-06\VWD-IB (1-2)-95-5-1ML-4UL-
210NM-40MIN.M
Last changed    : 5/10/2016 2:28:03 PM by SYSTEM
(modified after loading)
Analysis Method : E:\DATA\XZC\XZC-2-99\3-54 2016-05-10 10-53-06\VWD-IB (1-2)-95-5-1ML-4UL-
210NM-40MIN.M (Sequence Method)
Last changed    : 1/31/2018 11:30:28 AM by SYSTEM
(modified after loading)
Additional Info : Peak(s) manually integrated
=====
```

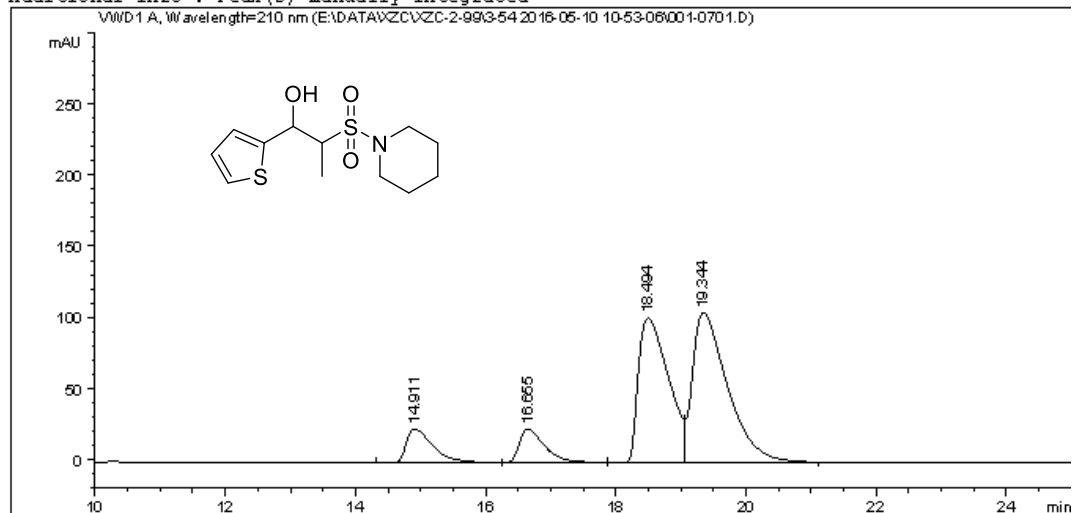

# Area Percent Report

```
Sorted By      : Signal
Multiplier     : 1.0000
Dilution       : 1.0000
Do not use Multiplier & Dilution Factor with ISTDs
```

Signal 1: VWD1 A, Wavelength=210 nm

| Peak # | RetTime [min] | Type | Width [min] | Area [mAU*s] | Height [mAU] | Area %  |
|--------|---------------|------|-------------|--------------|--------------|---------|
| 1      | 14.911        | BB   | 0.4353      | 671.86102    | 23.65860     | 7.9328  |
| 2      | 16.655        | BB   | 0.4026      | 629.86420    | 23.65797     | 7.4370  |
| 3      | 18.494        | BV   | 0.5004      | 3243.50854   | 101.34515    | 38.2969 |
| 4      | 19.344        | VB   | 0.5566      | 3924.13721   | 105.10754    | 46.3333 |

Totals : 8469.37097 253.76925

\*\*\* End of Report \*\*\*



Data File E:\DATA\XZC\XZC-DATA-1\XZC-20171207-1 2017-12-07 19-39-37\023-0401.D  
Sample Name: XZC-thio

```
=====
Acq. Operator   : SYSTEM                      Seq. Line :    4
Acq. Instrument : 1260HPLC-VWD                Location  : Vial 23
Injection Date  : 12/7/2017 9:33:18 PM        Inj       :    1
                                           Inj Volume: 2.000 µl

Acq. Method     : E:\DATA\XZC\XZC-DATA-1\XZC-20171207-1 2017-12-07 19-39-37\VWD-IB(1-6)-95
                  -5-1ML-2UL-210NM-40MIN.M
Last changed    : 12/7/2017 7:46:25 PM by SYSTEM
Analysis Method : E:\DATA\XZC\XZC-DATA-1\XZC-20171207-1 2017-12-07 19-39-37\VWD-IB(1-6)-95
                  -5-1ML-2UL-210NM-40MIN.M (Sequence Method)
Last changed    : 1/31/2018 11:32:04 AM by SYSTEM
                  (modified after loading)
Additional Info : Peak(s) manually integrated
=====
```

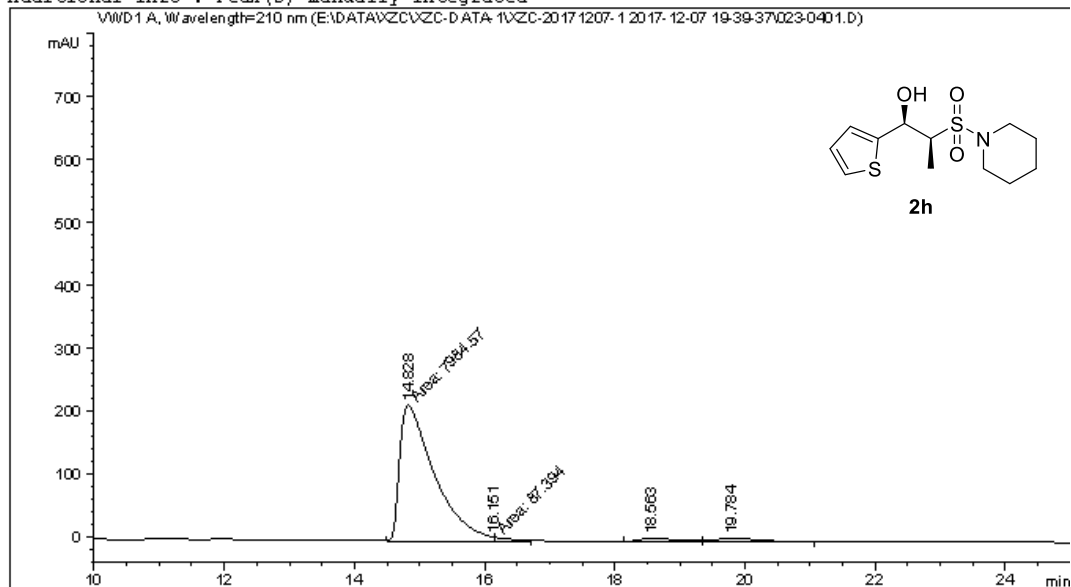

Area Percent Report

```
Sorted By      : Signal
Multiplier     : 1.0000
Dilution       : 1.0000
Do not use Multiplier & Dilution Factor with ISTDs
```

Signal 1: VWD1 A, Wavelength=210 nm

| Peak # | RetTime [min] | Type | Width [min] | Area [mAU*s] | Height [mAU] | Area %  |
|--------|---------------|------|-------------|--------------|--------------|---------|
| 1      | 14.828        | MF   | 0.6176      | 7984.56689   | 215.48038    | 94.3728 |
| 2      | 16.151        | FM   | 0.2478      | 87.39399     | 5.87807      | 1.0329  |
| 3      | 18.563        | BV   | 0.5765      | 162.58961    | 4.02280      | 1.9217  |
| 4      | 19.784        | VB   | 0.5908      | 226.11237    | 5.55620      | 2.6725  |

Totals : 8460.66286 230.93745

Data File E:\DATA\XZC\XZC-180108\XZC-180108-2 2018-01-08 14-01-51\051-1601.D  
Sample Name: XZC-naph-RAC

```
=====
Acq. Operator   : SYSTEM                      Seq. Line :   16
Acq. Instrument : 1260HPLC-VWD                Location  : Vial 51
Injection Date  : 1/8/2018 10:39:31 PM        Inj       :    1
                                           Inj Volume: 1.000 µl

Acq. Method     : E:\DATA\XZC\XZC-180108\XZC-180108-2 2018-01-08 14-01-51\VWD-IB(1-6)-90-
                  10-1ML-1UL-220NM-30MIN.M
Last changed    : 1/8/2018 9:58:10 PM by SYSTEM
Analysis Method : E:\DATA\XZC\XZC-180108\XZC-180108-2 2018-01-08 14-01-51\VWD-IB(1-6)-90-
                  10-1ML-1UL-220NM-30MIN.M (Sequence Method)
Last changed    : 1/31/2018 10:18:34 AM by SYSTEM
                  (modified after loading)
Additional Info : Peak(s) manually integrated
=====
```

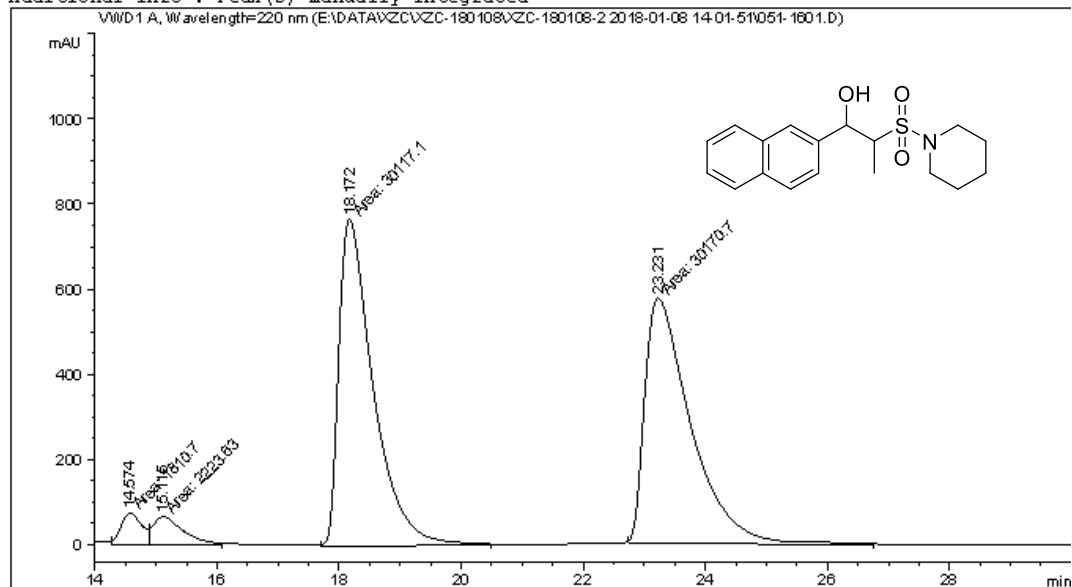

# Area Percent Report

```
Sorted By      : Signal
Multiplier     : 1.0000
Dilution      : 1.0000
Do not use Multiplier & Dilution Factor with ISTDs
```

Signal 1: VWD1 A, Wavelength=220 nm

| Peak # | RetTime [min] | Type | Width [min] | Area [mAU*s] | Height [mAU] | Area %  |
|--------|---------------|------|-------------|--------------|--------------|---------|
| 1      | 14.574        | MF   | 0.4078      | 1810.70276   | 74.00624     | 2.8151  |
| 2      | 15.115        | FM   | 0.5645      | 2223.62793   | 65.64807     | 3.4570  |
| 3      | 18.172        | MM   | 0.6538      | 3.01171e4    | 767.68579    | 46.8223 |
| 4      | 23.231        | MM   | 0.8742      | 3.01707e4    | 575.20032    | 46.9056 |

Totals : 6.43220e4 1482.54042

Data File E:\DATA\XZC\XZC-180108\XZC-180108-2 2018-01-08 14-01-51\053-1701.D  
Sample Name: XZC-naph

```
=====
Acq. Operator   : SYSTEM                      Seq. Line :   17
Acq. Instrument : 1260HPLC-VWD                Location  : Vial 53
Injection Date  : 1/8/2018 11:10:16 PM        Inj       :    1
                                           Inj Volume: 1.000 µl

Acq. Method     : E:\DATA\XZC\XZC-180108\XZC-180108-2 2018-01-08 14-01-51\VWD-IB(1-6)-90-
                  10-1ML-1UL-220NM-30MIN.M
Last changed    : 1/8/2018 9:58:10 PM by SYSTEM
Analysis Method : E:\DATA\XZC\XZC-180108\XZC-180108-2 2018-01-08 14-01-51\VWD-IB(1-6)-90-
                  10-1ML-1UL-220NM-30MIN.M (Sequence Method)
Last changed    : 1/31/2018 10:23:16 AM by SYSTEM
                  (modified after loading)
Additional Info : Peak(s) manually integrated
=====
```

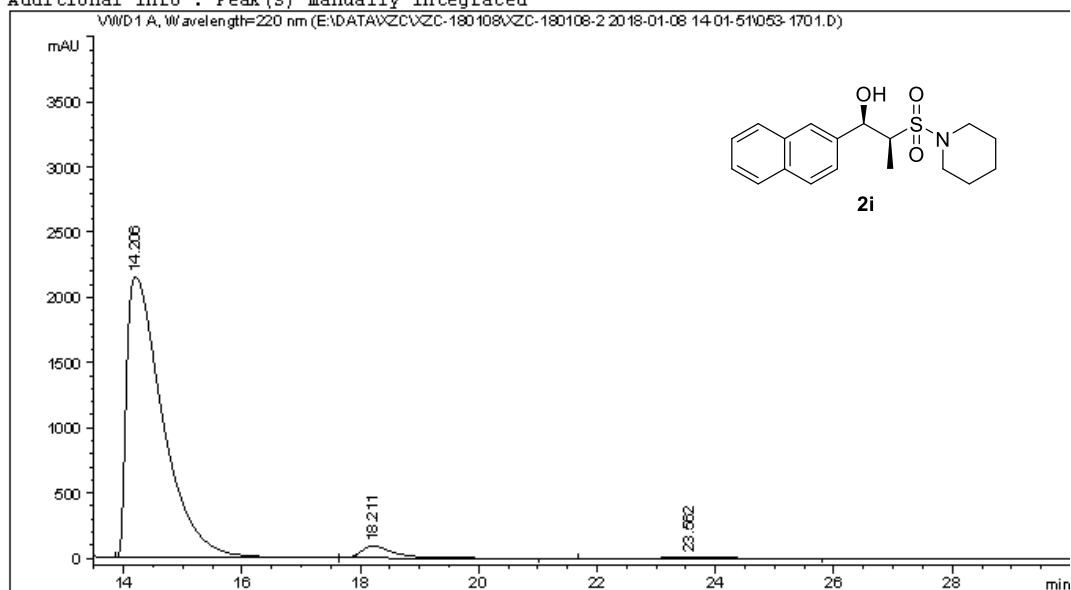

=====  
Area Percent Report  
=====

Sorted By : Signal  
Multiplier : 1.0000  
Dilution : 1.0000  
Do not use Multiplier & Dilution Factor with ISTDs

Signal 1: VWD1 A, Wavelength=220 nm

| Peak # | RetTime [min] | Type | Width [min] | Area [mAU*s] | Height [mAU] | Area %  |
|--------|---------------|------|-------------|--------------|--------------|---------|
| 1      | 14.206        | VB   | 0.6353      | 9.13525e4    | 2156.09497   | 95.6984 |
| 2      | 18.211        | BB   | 0.5664      | 3484.41943   | 91.67145     | 3.6502  |
| 3      | 23.562        | BB   | 0.7990      | 621.86285    | 11.26504     | 0.6514  |

Totals : 9.54588e4 2259.03146

Data File E:\DATA\XZC\XZC-0727\XZC-0727 2016-07-27 15-42-13\064-0601.D  
Sample Name: XZC-5RING-RAC

```
=====
Acq. Operator   : SYSTEM                      Seq. Line :    6
Acq. Instrument : 1260HPLC-VWD                Location  : Vial 64
Injection Date  : 7/27/2016 6:27:00 PM        Inj       :    1
                                           Inj Volume: 4.000 µl
Acq. Method     : E:\DATA\XZC\XZC-0727\XZC-0727 2016-07-27 15-42-13\VWD-IB(1-2)-95-5-1ML-
                  4UL-210NM-40MIN.M
Last changed    : 7/27/2016 3:42:14 PM by SYSTEM
Analysis Method : E:\DATA\XZC\XZC-0727\XZC-0727 2016-07-27 15-42-13\VWD-IB(1-2)-95-5-1ML-
                  4UL-210NM-40MIN.M (Sequence Method)
Last changed    : 11/28/2017 8:08:22 PM by SYSTEM
                  (modified after loading)
Additional Info : Peak(s) manually integrated
=====
```

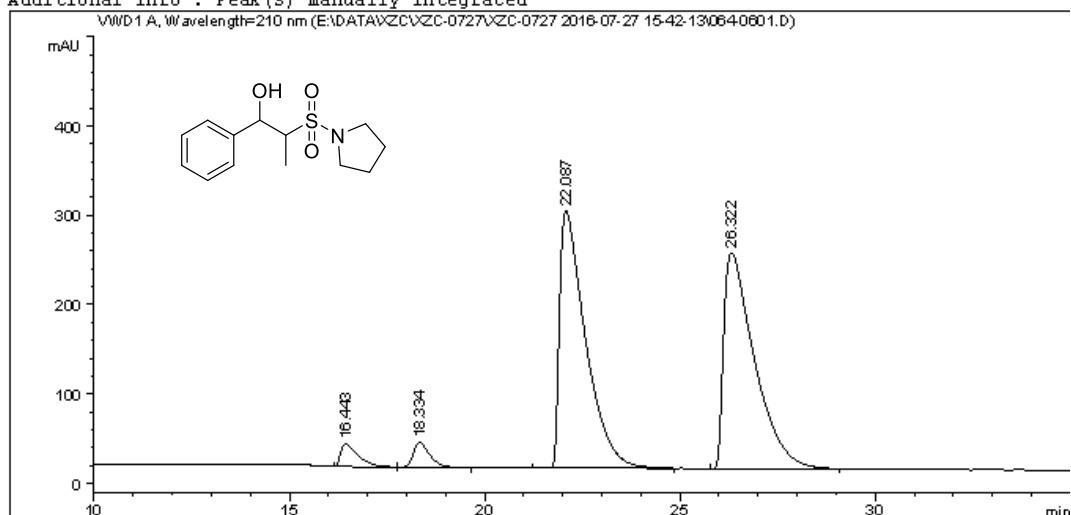

# Area Percent Report

```
Sorted By      : Signal
Multiplier     : 1.0000
Dilution      : 1.0000
Do not use Multiplier & Dilution Factor with ISTDs
```

Signal 1: VWD1 A, Wavelength=210 nm

| Peak # | RetTime [min] | Type | Width [min] | Area [mAU*s] | Height [mAU] | Area %  |
|--------|---------------|------|-------------|--------------|--------------|---------|
| 1      | 16.443        | BB   | 0.4612      | 789.61334    | 25.50612     | 2.8097  |
| 2      | 18.334        | BB   | 0.4444      | 819.18225    | 27.91368     | 2.9149  |
| 3      | 22.087        | BB   | 0.6821      | 1.32860e4    | 288.04010    | 47.2753 |
| 4      | 26.322        | BB   | 0.7972      | 1.32087e4    | 241.82739    | 47.0002 |

Totals : 2.81035e4 583.28729

\*\*\* End of Report \*\*\*

Data File E:\DATA\XZC\XZC-DATA-1\XZC-20171208-2 2017-12-08 15-51-50\022-0201.D  
Sample Name: XZC-pyrrole

```
=====
Acq. Operator   : SYSTEM                      Seq. Line :    2
Acq. Instrument : 1260HPLC-VWD                Location  : Vial 22
Injection Date  : 12/8/2017 4:15:04 PM        Inj       :    1
                                           Inj Volume: 2.000 µl

Acq. Method     : E:\DATA\XZC\XZC-DATA-1\XZC-20171208-2 2017-12-08 15-51-50\VWD-IB(1-6)-95
                  -5-1ML-2UL-210NM-40MIN.M
Last changed    : 12/8/2017 3:51:50 PM by SYSTEM
Analysis Method : E:\DATA\XZC\XZC-DATA-1\XZC-20171208-2 2017-12-08 15-51-50\VWD-IB(1-6)-95
                  -5-1ML-2UL-210NM-40MIN.M (Sequence Method)
Last changed    : 1/30/2018 9:00:12 PM by SYSTEM
                  (modified after loading)
Additional Info : Peak(s) manually integrated
=====
```

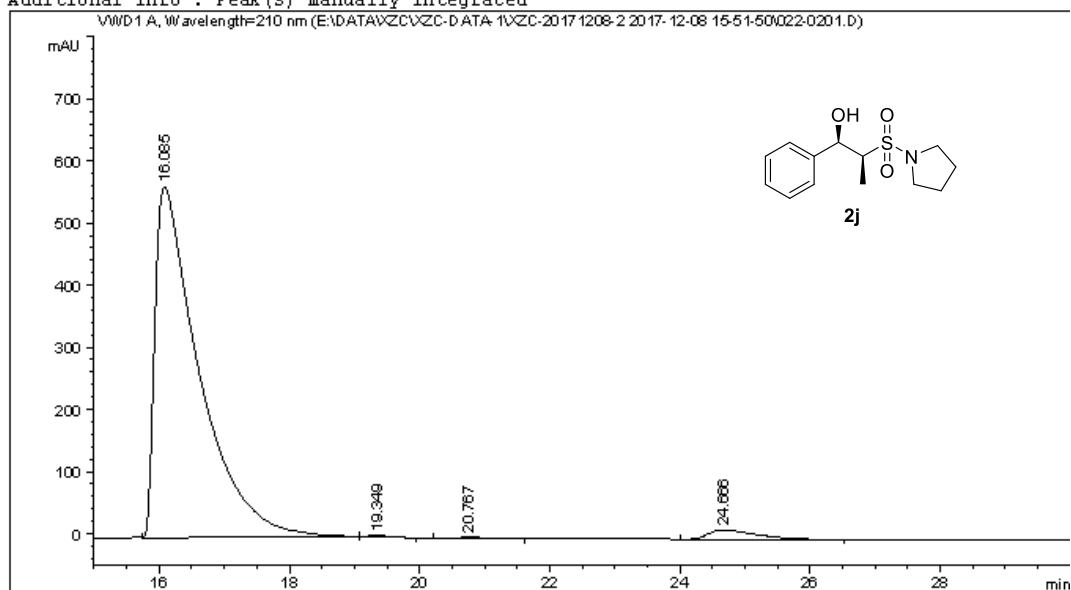

Area Percent Report

```
Sorted By      : Signal
Multiplier     : 1.0000
Dilution       : 1.0000
Do not use Multiplier & Dilution Factor with ISTDs
```

Signal 1: VWD1 A, Wavelength=210 nm

| Peak # | RetTime [min] | Type | Width [min] | Area [mAU*s] | Height [mAU] | Area %  |
|--------|---------------|------|-------------|--------------|--------------|---------|
| 1      | 16.085        | VB   | 0.6635      | 2.64561e4    | 564.80981    | 96.7846 |
| 2      | 19.349        | BB   | 0.3974      | 45.41839     | 1.78188      | 0.1662  |
| 3      | 20.767        | BB   | 0.5119      | 66.05001     | 1.89840      | 0.2416  |
| 4      | 24.666        | BB   | 0.7469      | 767.45490    | 15.10091     | 2.8076  |

Totals : 2.73350e4 583.59101

Data File E:\DATA\XZC\XZC-0811\WWL-DKR-RAC-DERATIVES 2016-08-13 10-49-54\025-0201.D  
Sample Name: XZC-morphine-RAC

```
=====
Acq. Operator   : SYSTEM                      Seq. Line :    2
Acq. Instrument : 1260HPLC-VWD                Location  : Vial 25
Injection Date  : 8/13/2016 11:16:32 AM       Inj       :    1
                                           Inj Volume: 4.000 µl
Acq. Method     : E:\DATA\XZC\XZC-0811\WWL-DKR-RAC-DERATIVES 2016-08-13 10-49-54\VWD-IB(1-
6)-95-5-1ML-4UL-210NM-60MIN.M
Last changed    : 8/13/2016 10:49:54 AM by SYSTEM
Analysis Method : E:\DATA\XZC\XZC-0811\WWL-DKR-RAC-DERATIVES 2016-08-13 10-49-54\VWD-IB(1-
6)-95-5-1ML-4UL-210NM-60MIN.M (Sequence Method)
Last changed    : 11/28/2017 8:04:12 PM by SYSTEM
                (modified after loading)
Additional Info : Peak(s) manually integrated
=====
```

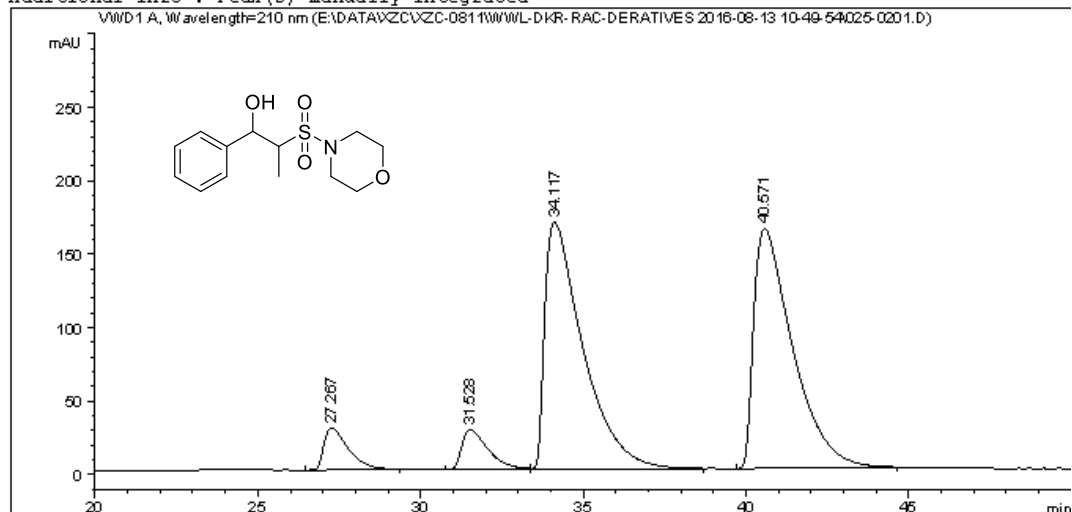

# Area Percent Report

```
Sorted By      :      Signal
Multiplier     :      1.0000
Dilution       :      1.0000
Do not use Multiplier & Dilution Factor with ISTDs
```

Signal 1: VWD1 A, Wavelength=210 nm

| Peak # | RetTime [min] | Type | Width [min] | Area [mAU*s] | Height [mAU] | Area %  |
|--------|---------------|------|-------------|--------------|--------------|---------|
| 1      | 27.267        | BB   | 0.7899      | 1488.25549   | 28.65451     | 4.9443  |
| 2      | 31.528        | BB   | 0.8258      | 1473.23047   | 26.86329     | 4.8943  |
| 3      | 34.117        | BB   | 1.1739      | 1.35865e4    | 167.58055    | 45.1368 |
| 4      | 40.571        | BB   | 1.2328      | 1.35527e4    | 163.20480    | 45.0245 |

Totals : 3.01007e4 386.30315

\*\*\* End of Report \*\*\*

Data File E:\DATA\XZC\XZC-DATA-1\XZC-20171208-1 2017-12-08 10-22-44\021-0201.D  
Sample Name: XZC-morph

```
=====
Acq. Operator   : SYSTEM                      Seq. Line :    2
Acq. Instrument : 1260HPLC-VWD                Location  : Vial 21
Injection Date  : 12/8/2017 10:35:17 AM       Inj       :    1
                                           Inj Volume: 3.000 µl

Acq. Method     : E:\DATA\XZC\XZC-DATA-1\XZC-20171208-1 2017-12-08 10-22-44\VWD-IB(1-6)-95
                  -5-1ML-3UL-210NM-60MIN.M
Last changed    : 12/8/2017 10:22:45 AM by SYSTEM
Analysis Method : E:\DATA\XZC\XZC-DATA-1\XZC-20171208-1 2017-12-08 10-22-44\VWD-IB(1-6)-95
                  -5-1ML-3UL-210NM-60MIN.M (Sequence Method)
Last changed    : 1/31/2018 10:06:05 AM by SYSTEM
                  (modified after loading)
Additional Info : Peak(s) manually integrated
=====
```

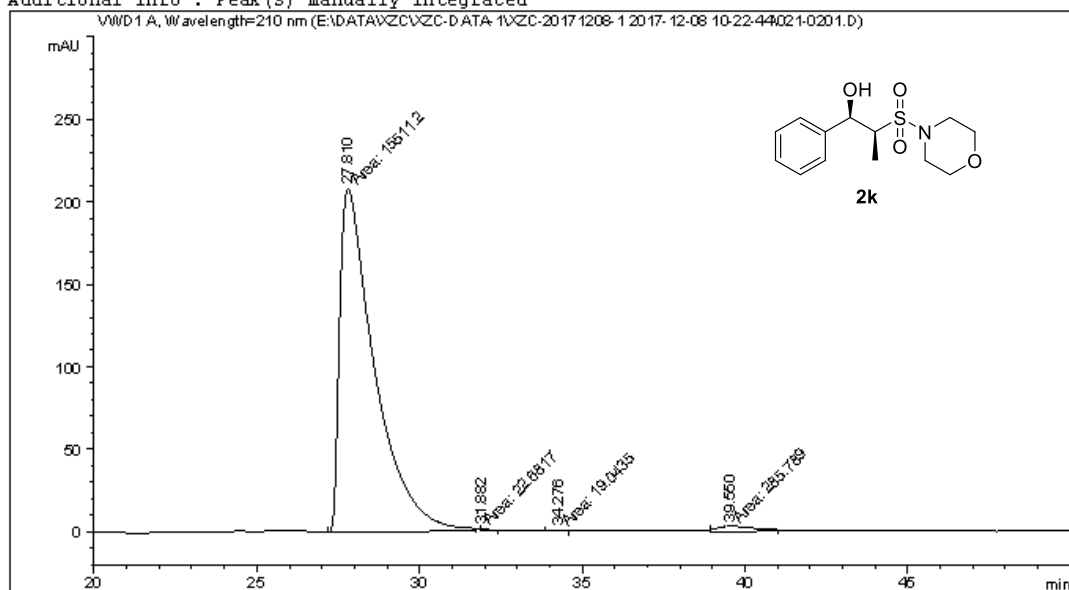

# Area Percent Report

```
Sorted By      :      Signal
Multiplier     :      1.0000
Dilution       :      1.0000
Do not use Multiplier & Dilution Factor with ISTDs
```

Signal 1: VWD1 A, Wavelength=210 nm

| Peak # | RetTime [min] | Type | Width [min] | Area [mAU*s] | Height [mAU] | Area %  |
|--------|---------------|------|-------------|--------------|--------------|---------|
| 1      | 27.810        | MM   | 1.2417      | 1.55112e4    | 208.20322    | 97.9322 |
| 2      | 31.882        | MM   | 0.3443      | 22.68172     | 1.09790      | 0.1432  |
| 3      | 34.276        | MM   | 0.6385      | 19.04350     | 4.97103e-1   | 0.1202  |
| 4      | 39.550        | MM   | 1.3278      | 285.78909    | 3.58713      | 1.8044  |

Totals : 1.58387e4 213.38535

Data File E:\DATA\XZC\XZC-DATA-1\XZC-171222-2 2017-12-22 20-20-16\003-0701.D  
Sample Name: XZC-dm-RAC

```
=====
Acq. Operator   : SYSTEM                      Seq. Line :    7
Acq. Instrument : 1260HPLC-VWD                Location  : Vial 3
Injection Date  : 12/22/2017 10:57:03 PM      Inj       :    1
                                           Inj Volume: 2.000 µl
Acq. Method     : E:\DATA\XZC\XZC-DATA-1\XZC-171222-2 2017-12-22 20-20-16\VWD-IB(1-6)-95-5
                  -1ML-2UL-210NM-40MIN.M
Last changed    : 12/22/2017 8:20:17 PM by SYSTEM
Analysis Method : E:\DATA\XZC\XZC-DATA-1\XZC-171222-2 2017-12-22 20-20-16\VWD-IB(1-6)-95-5
                  -1ML-2UL-210NM-40MIN.M (Sequence Method)
Last changed    : 1/31/2018 11:16:57 AM by SYSTEM
                  (modified after loading)
Additional Info : Peak(s) manually integrated
=====
```

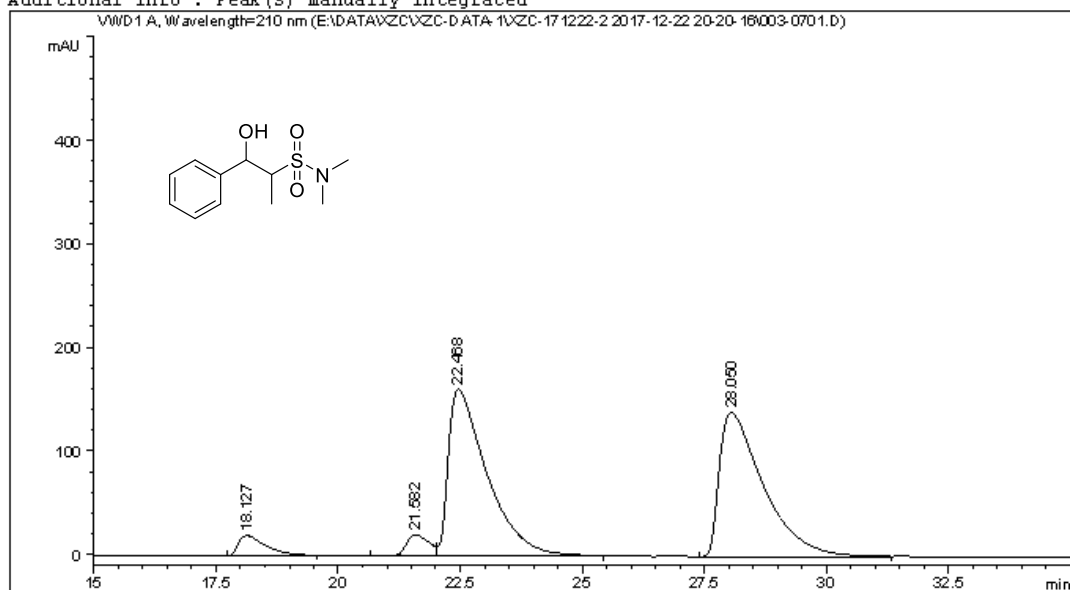

# Area Percent Report

```
Sorted By      :      Signal
Multiplier     :      1.0000
Dilution       :      1.0000
Do not use Multiplier & Dilution Factor with ISTDs
```

Signal 1: VWD1 A, Wavelength=210 nm

| Peak # | RetTime [min] | Type | Width [min] | Area [mAU*s] | Height [mAU] | Area %  |
|--------|---------------|------|-------------|--------------|--------------|---------|
| 1      | 18.127        | BB   | 0.5675      | 721.49707    | 18.93785     | 3.8073  |
| 2      | 21.582        | BV   | 0.4938      | 647.35608    | 20.36981     | 3.4161  |
| 3      | 22.468        | VB   | 0.8100      | 8854.12109   | 160.89922    | 46.7233 |
| 4      | 28.050        | BB   | 0.9245      | 8727.15527   | 139.38730    | 46.0533 |

Totals : 1.89501e4 339.59417



Data File E:\DATA\XZC\XZC-DATA-1\XZC-171222-2 2017-12-22 20-20-16\004-0801.D  
Sample Name: XZC-dm

```
=====
Acq. Operator   : SYSTEM                      Seq. Line :    8
Acq. Instrument : 1260HPLC-VWD                Location  : Vial 4
Injection Date  : 12/22/2017 11:37:45 PM      Inj       :    1
                                           Inj Volume: 2.000 µl

Acq. Method     : E:\DATA\XZC\XZC-DATA-1\XZC-171222-2 2017-12-22 20-20-16\VWD-IB(1-6)-95-5
                  -1ML-2UL-210NM-40MIN.M
Last changed    : 12/22/2017 8:20:17 PM by SYSTEM
Analysis Method : E:\DATA\XZC\XZC-DATA-1\XZC-171222-2 2017-12-22 20-20-16\VWD-IB(1-6)-95-5
                  -1ML-2UL-210NM-40MIN.M (Sequence Method)
Last changed    : 1/31/2018 11:21:07 AM by SYSTEM
                  (modified after loading)
Additional Info  : Peak(s) manually integrated
=====
```

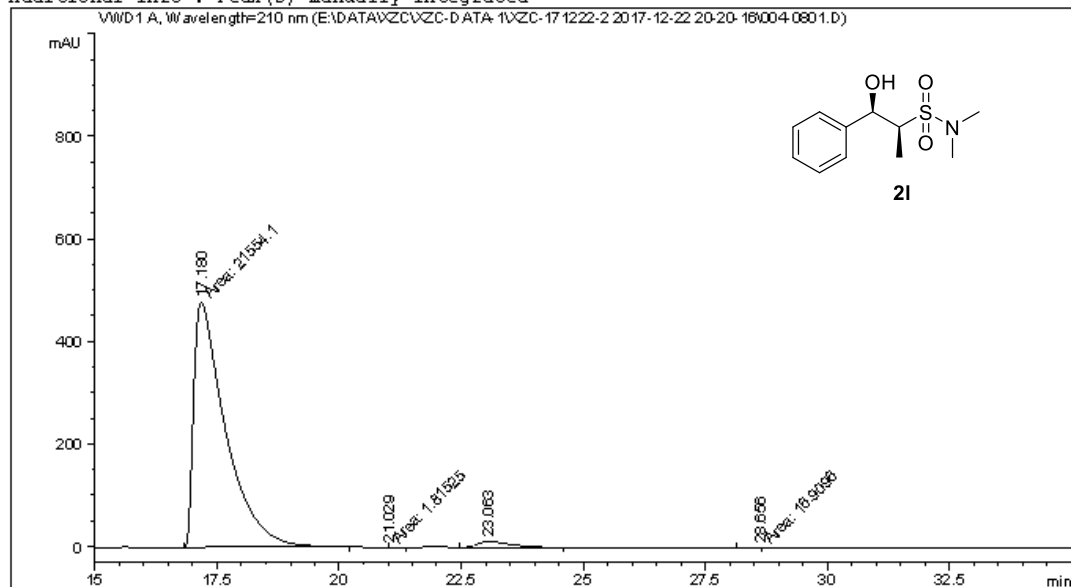

# Area Percent Report

```
Sorted By      : Signal
Multiplier     : 1.0000
Dilution       : 1.0000
Do not use Multiplier & Dilution Factor with ISTDs
```

Signal 1: VWD1 A, Wavelength=210 nm

| Peak # | RetTime [min] | Type | Width [min] | Area [mAU*s] | Height [mAU] | Area %   |
|--------|---------------|------|-------------|--------------|--------------|----------|
| 1      | 17.180        | MM   | 0.7514      | 2.15541e4    | 478.10046    | 97.6305  |
| 2      | 21.029        | MM   | 0.1445      | 1.81525      | 1.48409e-1   | 8.222e-3 |
| 3      | 23.063        | BB   | 0.6628      | 504.38492    | 11.23520     | 2.2846   |
| 4      | 28.656        | MM   | 0.1596      | 16.90961     | 1.76546      | 0.0766   |

Totals : 2.20772e4 491.24953

Data File E:\DATA\XZC\XZC-DATA-1\XZC-171222-2 2017-12-22 20-20-16\001-0301.D  
Sample Name: XZC-sulfon-RAC

```
=====
Acq. Operator   : SYSTEM                      Seq. Line :    3
Acq. Instrument : 1260HPLC-VWD                Location  : Vial 1
Injection Date  : 12/22/2017 8:53:18 PM       Inj       :    1
                                           Inj Volume: 3.000 µl

Acq. Method     : E:\DATA\XZC\XZC-DATA-1\XZC-171222-2 2017-12-22 20-20-16\VWD-AD(1-2)-90-
                  10-1ML-3UL-210NM-45MIN.M
Last changed    : 12/22/2017 8:20:16 PM by SYSTEM
Analysis Method : E:\DATA\XZC\XZC-DATA-1\XZC-171222-2 2017-12-22 20-20-16\VWD-AD(1-2)-90-
                  10-1ML-3UL-210NM-45MIN.M (Sequence Method)
Last changed    : 1/30/2018 9:50:35 PM by SYSTEM
                  (modified after loading)
Additional Info : Peak(s) manually integrated
=====
```

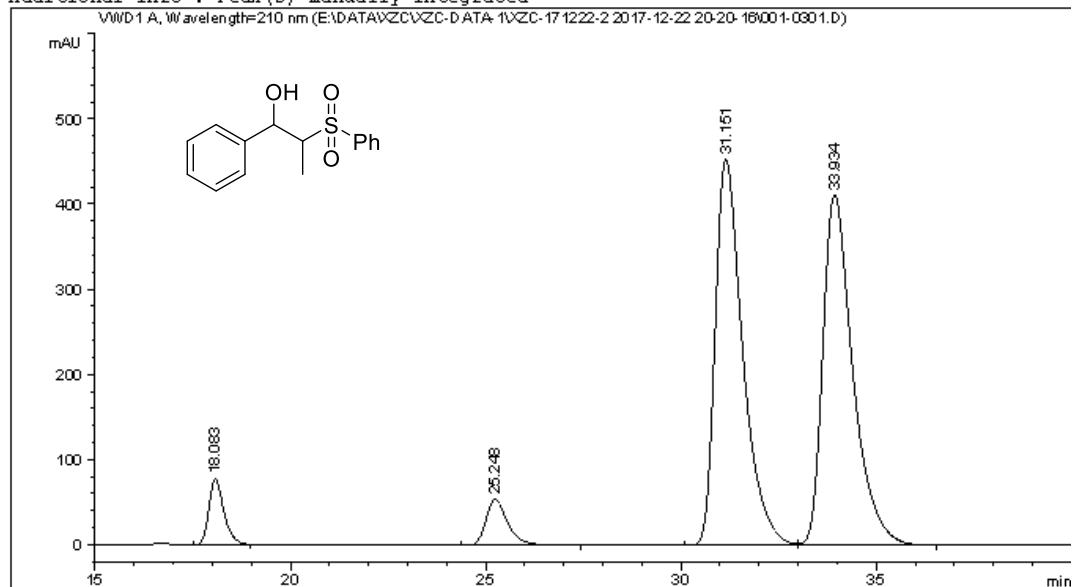

# Area Percent Report

```
Sorted By      :      Signal
Multiplier     :      1.0000
Dilution       :      1.0000
Do not use Multiplier & Dilution Factor with ISTDs
```

Signal 1: VWD1 A, Wavelength=210 nm

| Peak # | RetTime [min] | Type | Width [min] | Area [mAU*s] | Height [mAU] | Area %  |
|--------|---------------|------|-------------|--------------|--------------|---------|
| 1      | 18.083        | BB   | 0.4044      | 2075.11450   | 77.48622     | 4.2920  |
| 2      | 25.248        | BB   | 0.5879      | 2113.95703   | 54.09230     | 4.3724  |
| 3      | 31.151        | BV   | 0.7419      | 2.22281e4    | 453.47769    | 45.9753 |
| 4      | 33.934        | VB   | 0.8044      | 2.19307e4    | 411.07297    | 45.3602 |

Totals : 4.83479e4 996.12918

Data File E:\DATA\XZC\XZC-DATA-1\XZC-171222-2 2017-12-22 20-20-16\002-0401.D  
Sample Name: XZC-sulfon

```
=====
Acq. Operator   : SYSTEM                      Seq. Line :    4
Acq. Instrument : 1260HPLC-VWD                Location  : Vial 2
Injection Date  : 12/22/2017 9:39:02 PM       Inj       :    1
                                           Inj Volume: 3.000 µl

Acq. Method     : E:\DATA\XZC\XZC-DATA-1\XZC-171222-2 2017-12-22 20-20-16\VWD-AD(1-2)-90-
                  10-1ML-3UL-210NM-45MIN.M
Last changed    : 12/22/2017 8:20:16 PM by SYSTEM
Analysis Method : E:\DATA\XZC\XZC-DATA-1\XZC-171222-2 2017-12-22 20-20-16\VWD-AD(1-2)-90-
                  10-1ML-3UL-210NM-45MIN.M (Sequence Method)
Last changed    : 1/30/2018 9:53:32 PM by SYSTEM
                  (modified after loading)
Additional Info  : Peak(s) manually integrated
=====
```

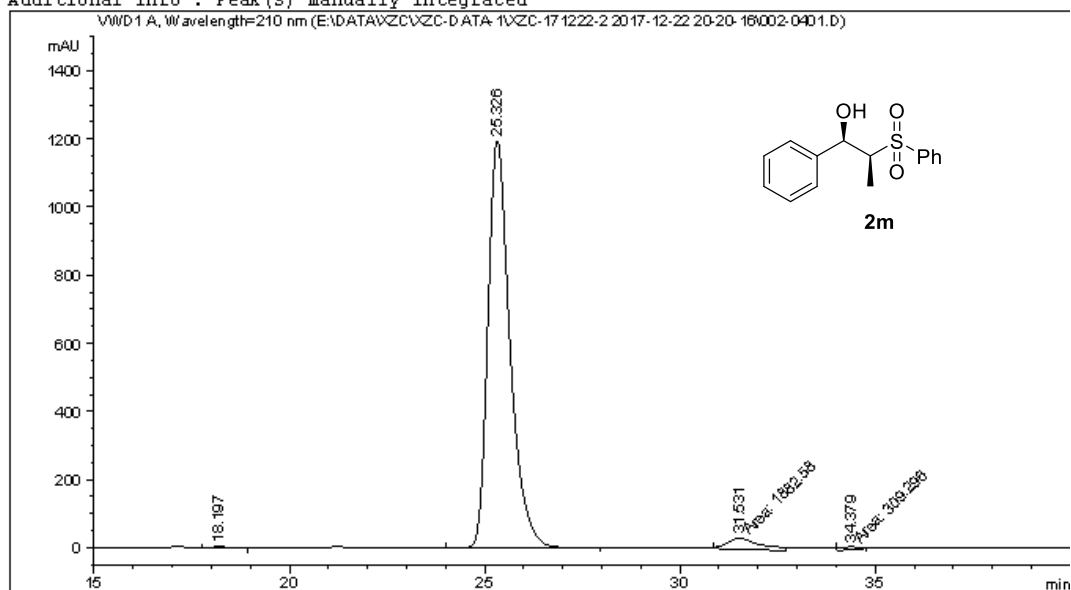

Area Percent Report

```
Sorted By      : Signal
Multiplier     : 1.0000
Dilution       : 1.0000
Do not use Multiplier & Dilution Factor with ISTDs
```

Signal 1: VWD1 A, Wavelength=210 nm

| Peak # | RetTime [min] | Type | Width [min] | Area [mAU*s] | Height [mAU] | Area %  |
|--------|---------------|------|-------------|--------------|--------------|---------|
| 1      | 18.197        | BB   | 0.4040      | 66.87212     | 2.48476      | 0.1365  |
| 2      | 25.326        | BB   | 0.5923      | 4.67261e4    | 1194.72327   | 95.3889 |
| 3      | 31.531        | MM   | 0.9926      | 1882.57715   | 31.60878     | 3.8432  |
| 4      | 34.379        | MM   | 0.5903      | 309.29623    | 7.34431      | 0.6314  |

Totals : 4.89849e4 1236.16112

Data File E:\DATA\XZC\XZC-20180111\XZC-180115-1 2018-01-15 16-01-58\041-0201.D  
Sample Name: XZC-Br-RAC

```

=====
Acq. Operator   : SYSTEM                      Seq. Line :    2
Acq. Instrument : 1260HPLC-VWD                Location  : Vial 41
Injection Date  : 1/15/2018 4:13:28 PM         Inj       :    1
                                           Inj Volume: 3.000 µl

Acq. Method     : E:\DATA\XZC\XZC-20180111\XZC-180115-1 2018-01-15 16-01-58\VWD-AD(1-2)-90
                  -10-1ML-3UL-210NM-35MIN.M
Last changed    : 1/15/2018 4:48:09 PM by SYSTEM
                  (modified after loading)
Analysis Method : E:\DATA\XZC\XZC-20180111\XZC-180115-1 2018-01-15 16-01-58\VWD-AD(1-2)-90
                  -10-1ML-3UL-210NM-35MIN.M (Sequence Method)
Last changed    : 1/31/2018 11:02:16 AM by SYSTEM
                  (modified after loading)
Additional Info : Peak(s) manually integrated

```

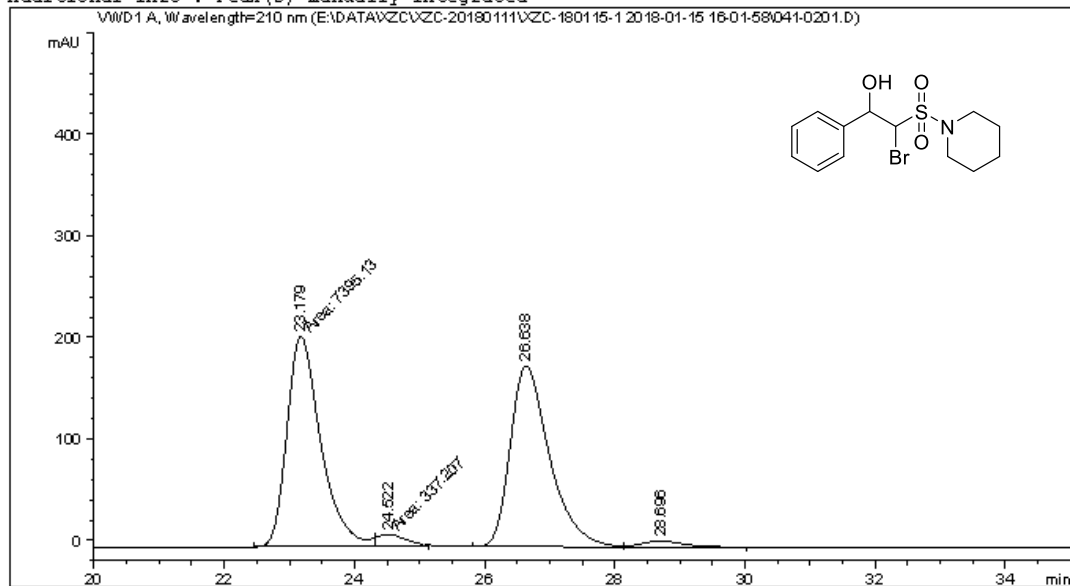

#### Area Percent Report

```

Sorted By      : Signal
Multiplier     : 1.0000
Dilution       : 1.0000
Do not use Multiplier & Dilution Factor with ISTDs

```

Signal 1: VWD1 A, Wavelength=210 nm

| Peak # | RetTime [min] | Type | Width [min] | Area [mAU*s] | Height [mAU] | Area %  |
|--------|---------------|------|-------------|--------------|--------------|---------|
| 1      | 23.179        | MF   | 0.5972      | 7395.12744   | 206.38376    | 47.9120 |
| 2      | 24.522        | FM   | 0.4984      | 337.20685    | 11.27615     | 2.1847  |
| 3      | 26.638        | BV   | 0.6331      | 7447.60693   | 178.02249    | 48.2520 |
| 4      | 28.696        | VB   | 0.6426      | 254.87865    | 5.75562      | 1.6513  |

Totals : 1.54348e4 401.43802

Data File E:\DATA\XZC\XZC-20180111\XZC-180116-1 2018-01-16 15-43-34\002-0201.D  
Sample Name: XZC-Br

```
=====
Acq. Operator   : SYSTEM                      Seq. Line :    2
Acq. Instrument : 1260HPLC-VWD                Location  : Vial 2
Injection Date  : 1/16/2018 3:56:01 PM        Inj       :    1
                                           Inj Volume: 3.000 µl

Acq. Method     : E:\DATA\XZC\XZC-20180111\XZC-180116-1 2018-01-16 15-43-34\VWD-AD (1-2)-90
                  -10-1ML-3UL-210NM-35MIN.M
Last changed    : 1/16/2018 3:43:34 PM by SYSTEM
Analysis Method : E:\DATA\XZC\XZC-20180111\XZC-180116-1 2018-01-16 15-43-34\VWD-AD (1-2)-90
                  -10-1ML-3UL-210NM-35MIN.M (Sequence Method)
Last changed    : 1/31/2018 11:05:36 AM by SYSTEM
                  (modified after loading)
Additional Info  : Peak(s) manually integrated
=====
```

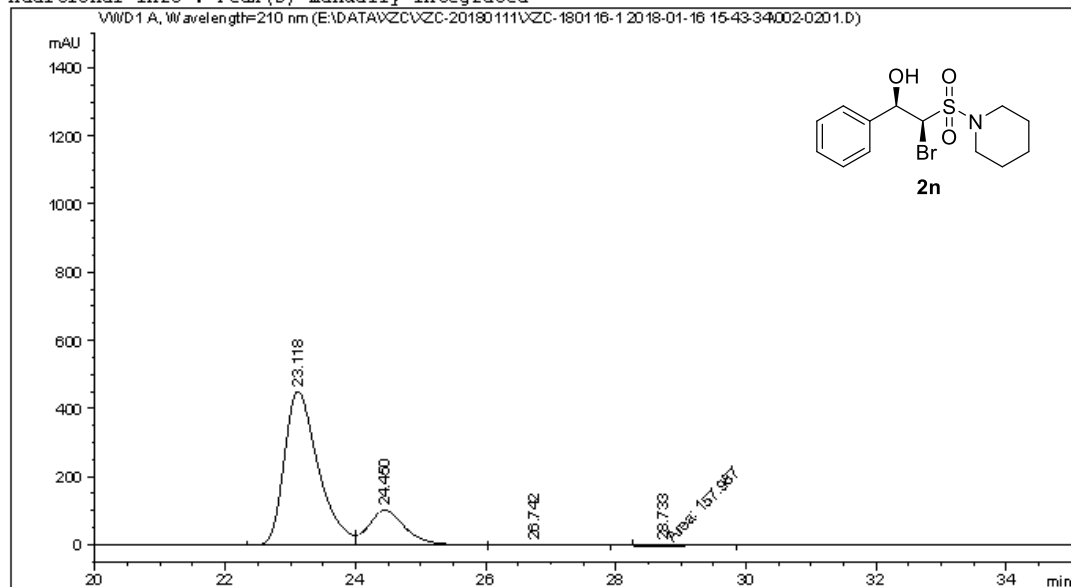

Area Percent Report

```
Sorted By      :      Signal
Multiplier     :      1.0000
Dilution       :      1.0000
Do not use Multiplier & Dilution Factor with ISTDs
```

Signal 1: VWD1 A, Wavelength=210 nm

| Peak # | RetTime [min] | Type | Width [min] | Area [mAU*s] | Height [mAU] | Area %  |
|--------|---------------|------|-------------|--------------|--------------|---------|
| 1      | 23.118        | BV   | 0.5486      | 1.63155e4    | 451.45810    | 79.3175 |
| 2      | 24.450        | VB   | 0.5889      | 4012.88306   | 102.25356    | 19.5085 |
| 3      | 26.742        | BB   | 0.6031      | 83.49436     | 2.05018      | 0.4059  |
| 4      | 28.733        | MM   | 1.0282      | 157.98688    | 2.56097      | 0.7680  |

Totals : 2.05699e4 558.32280

Data File E:\DATA\XZC\XZC-180103\XZC-180103-2 2018-01-03 14-33-45\001-0601.D  
Sample Name: XZC-C1-RAC

```
=====
Acq. Operator   : SYSTEM                      Seq. Line :    6
Acq. Instrument : 1260HPLC-VWD                Location  : Vial 1
Injection Date  : 1/3/2018 4:02:18 PM          Inj       :    1
                                           Inj Volume: 2.000 µl
Acq. Method     : E:\DATA\XZC\XZC-180103\XZC-180103-2 2018-01-03 14-33-45\VWD-IA(1-2)-95-5
                  -1ML-2UL-210NM-40MIN.M
Last changed    : 1/3/2018 4:11:22 PM by SYSTEM
                  (modified after loading)
Analysis Method : E:\DATA\XZC\XZC-180103\XZC-180103-2 2018-01-03 14-33-45\VWD-IA(1-2)-95-5
                  -1ML-2UL-210NM-40MIN.M (Sequence Method)
Last changed    : 1/3/2018 7:22:33 PM by SYSTEM
                  (modified after loading)
Additional Info : Peak(s) manually integrated
=====
```

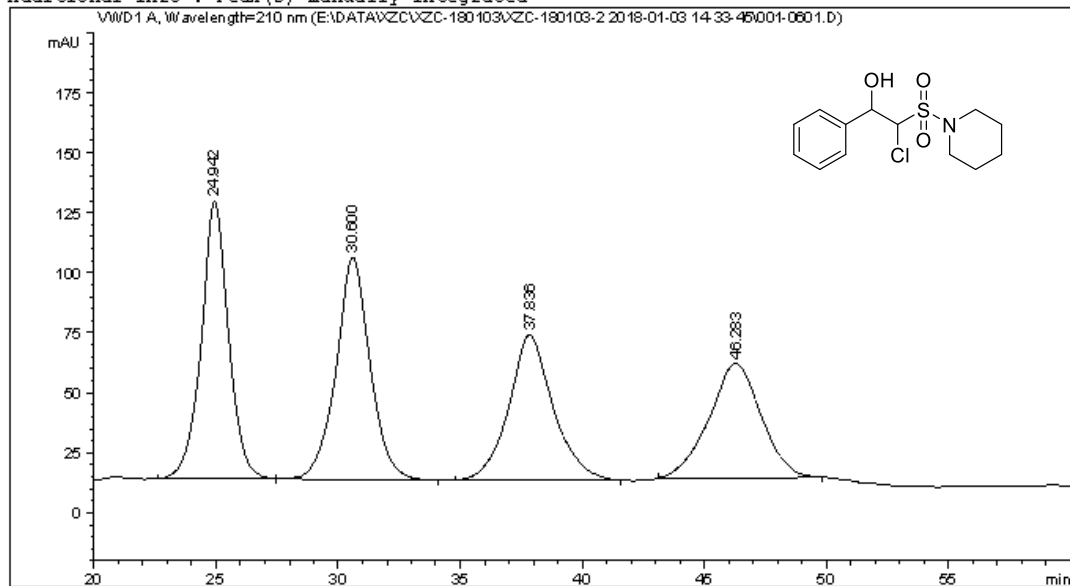

Area Percent Report

```
Sorted By      : Signal
Multiplier     : 1.0000
Dilution       : 1.0000
Do not use Multiplier & Dilution Factor with ISTDs
```

Signal 1: VWD1 A, Wavelength=210 nm

| Peak # | RetTime [min] | Type | Width [min] | Area [mAU*s] | Height [mAU] | Area %  |
|--------|---------------|------|-------------|--------------|--------------|---------|
| 1      | 24.942        | BB   | 1.1373      | 8965.39063   | 115.53982    | 27.4710 |
| 2      | 30.600        | BB   | 1.4032      | 8999.07129   | 92.65170     | 27.5742 |
| 3      | 37.836        | BB   | 1.7684      | 7624.28271   | 60.53615     | 23.3617 |
| 4      | 46.283        | BB   | 2.1048      | 7047.13965   | 47.50086     | 21.5932 |

Totals : 3.26359e4 316.22852

Data File E:\DATA\XZC\XZC-180103\XZC-180103-2 2018-01-03 14-33-45\002-0701.D  
Sample Name: XZC-C1

```
=====
Acq. Operator   : SYSTEM                      Seq. Line :    7
Acq. Instrument : 1260HPLC-VWD                Location  : Vial 2
Injection Date  : 1/3/2018 5:03:02 PM          Inj       :    1
                                           Inj Volume: 2.000 µl

Acq. Method     : E:\DATA\XZC\XZC-180103\XZC-180103-2 2018-01-03 14-33-45\VWD-IA(1-2)-95-5
                  -1ML-2UL-210NM-40MIN.M
Last changed    : 1/3/2018 4:11:22 PM by SYSTEM
Analysis Method : E:\DATA\XZC\XZC-180103\XZC-180103-2 2018-01-03 14-33-45\VWD-IA(1-2)-95-5
                  -1ML-2UL-210NM-40MIN.M (Sequence Method)
Last changed    : 1/3/2018 7:24:37 PM by SYSTEM
                  (modified after loading)
Additional Info  : Peak(s) manually integrated
=====
```

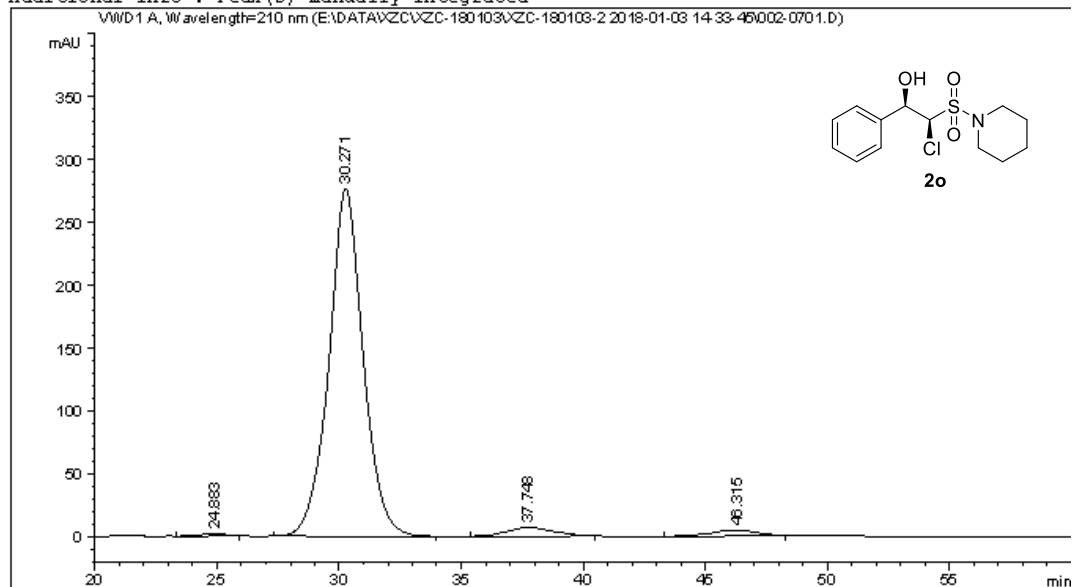

#### Area Percent Report

```
Sorted By      :      Signal
Multiplier     :      1.0000
Dilution       :      1.0000
Do not use Multiplier & Dilution Factor with ISTDs
```

Signal 1: VWD1 A, Wavelength=210 nm

| Peak # | RetTime [min] | Type | Width [min] | Area [mAU*s] | Height [mAU] | Area %  |
|--------|---------------|------|-------------|--------------|--------------|---------|
| 1      | 24.883        | BB   | 0.8341      | 153.94118    | 2.17922      | 0.5374  |
| 2      | 30.271        | BB   | 1.4302      | 2.69259e4    | 276.73410    | 93.9914 |
| 3      | 37.748        | BB   | 1.6306      | 938.47510    | 7.42008      | 3.2760  |
| 4      | 46.315        | BB   | 1.5643      | 628.87866    | 4.79452      | 2.1953  |

Totals : 2.86472e4 291.12793

## Reference:

1. John J. Piwinski *et al*, *Org. Lett.*, 2008, **10**, 2517–2520;
2. W. K. C. Park *et al*. *Bioorg. Med. Chem. Lett.*, 2008, **18**, 1151–1156;

3. M.-Y. Chang *et al.*, *Tetrahedron*, 2015, **71**, 782-791.
